# Supplementary material for: Joint multi-ancestry and admixed GWAS reveals the complex genetics behind human cranial vault shape
Source: PubMed Central journal article supplement (PMC10654897; doi:10.1038/s41467-023-43237-8), 2023-11-16

# Supplementary Information

## Overview of Genome-Wide Significant Loci

S. Goovaerts et al.

### Contents

|                   |    |
|-------------------|----|
| RS3936018 .....   | 3  |
| RS2009778 .....   | 4  |
| RS6739488 .....   | 5  |
| RS17479393 .....  | 6  |
| RS970797 .....    | 7  |
| RS7626244 .....   | 8  |
| RS35614773 .....  | 9  |
| RS1351637 .....   | 10 |
| RS3822730 .....   | 11 |
| RS4714260 .....   | 12 |
| RS3799970 .....   | 13 |
| RS9491697 .....   | 14 |
| RS296418 .....    | 15 |
| RS148673350 ..... | 16 |
| RS202055590 ..... | 17 |
| RS1581525 .....   | 18 |
| RS147676525 ..... | 19 |
| RS7813717 .....   | 20 |
| RS10120728 .....  | 21 |
| RS7920484 .....   | 22 |
| RS61920200 .....  | 23 |
| RS10843158 .....  | 24 |
| RS151174669 ..... | 25 |
| RS11609649 .....  | 26 |
| RS1034266 .....   | 27 |
| RS1380208 .....   | 28 |
| RS4842918 .....   | 29 |
| RS12940346 .....  | 30 |
| RS1321454 .....   | 31 |
| RS6054748 .....   | 32 |

See page 2 for captions

**Overview figures of 30 genome-wide significant loci.** **A**, LocusZoom plots for the segment in which the SNP had its lowest P-value (one-sided chi-square). Points are colored based on linkage disequilibrium ( $r^2$ ) in the 1000 Genomes Phase 3 EUR population. **B**,  $-\log_{10}(P\text{-values})$  (one-sided chi-square) across hierarchical cranial vault segments. Genome-wide significant associations ( $P < 5e-8$ ) are indicated with black circles on the polar dendrogram and segments that significantly replicated in the UK Biobank ( $P < 0.0244$ ) are indicated with '\*'. **C**, Latent shapes associated with the most significant segment (top row), and full cranial vault (bottom row). Red and blue represent an outwards and inwards deformation respectively relative to the overall average cranial vault shape.

rs3936018

A

CV11

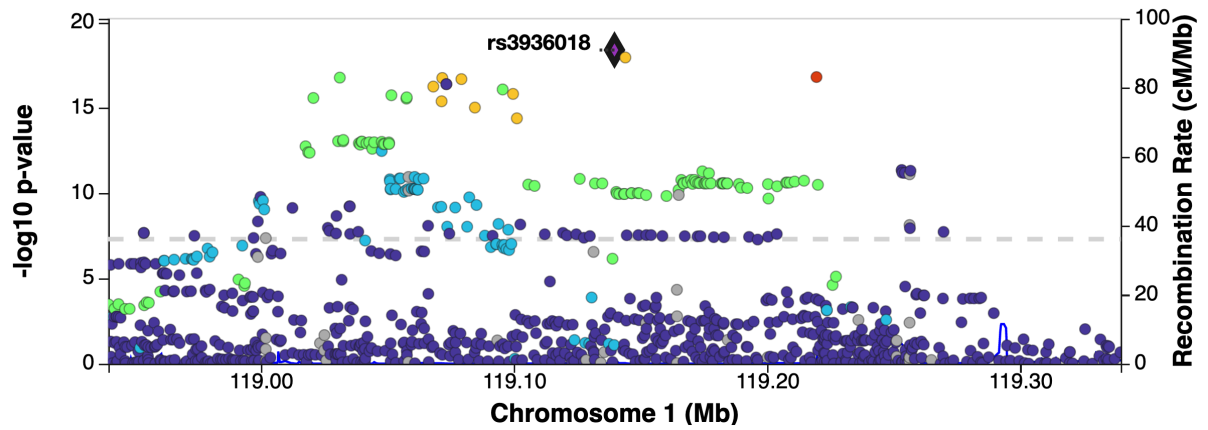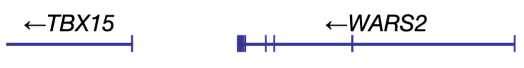

B

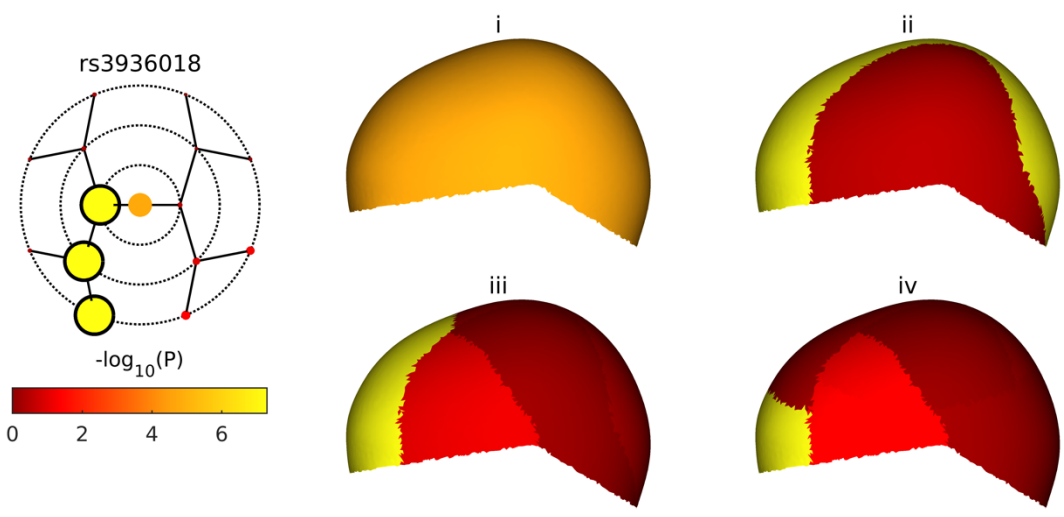

C

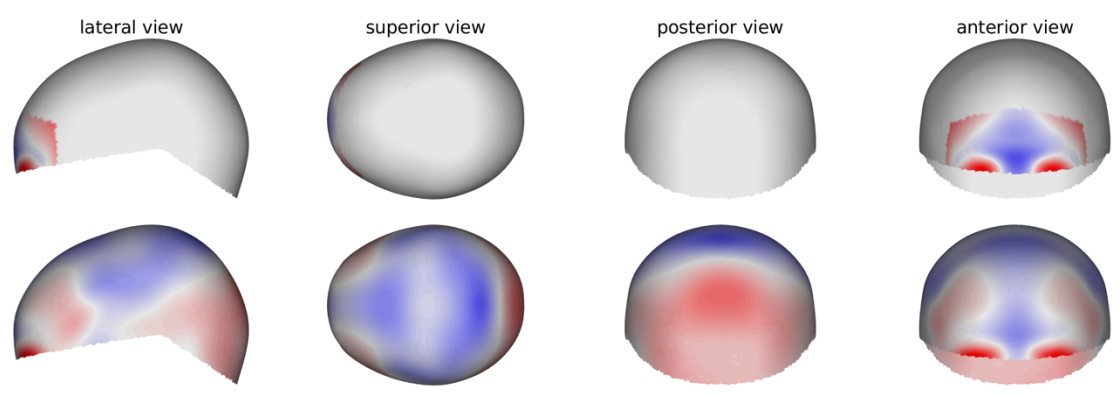

See page 2 for captions

rs2009778

A

CV1

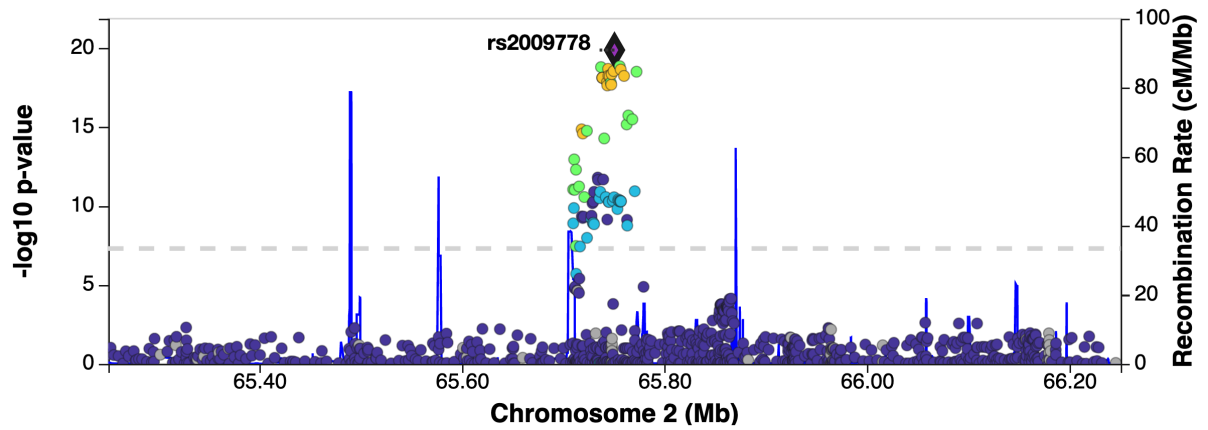

B

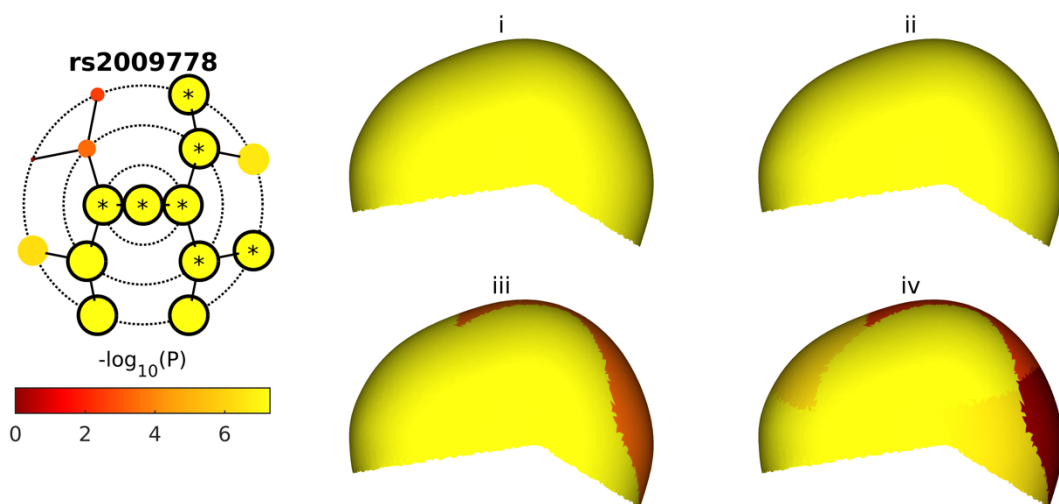

C

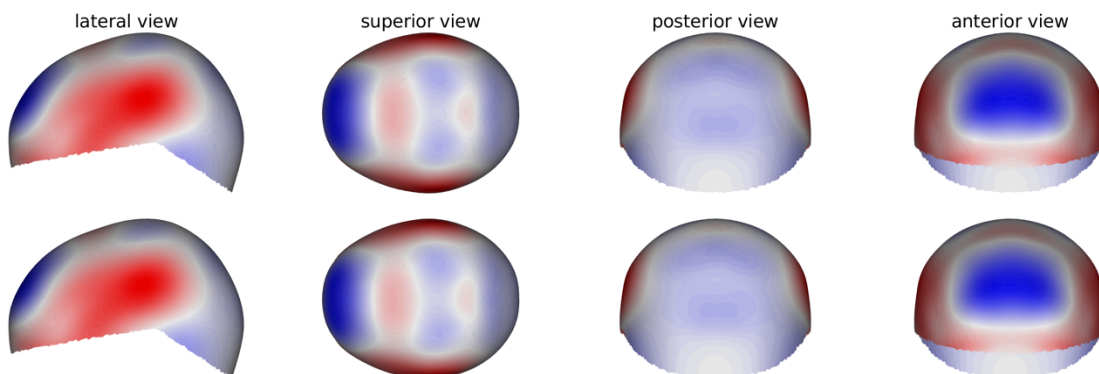

rs6739488

A

CV1

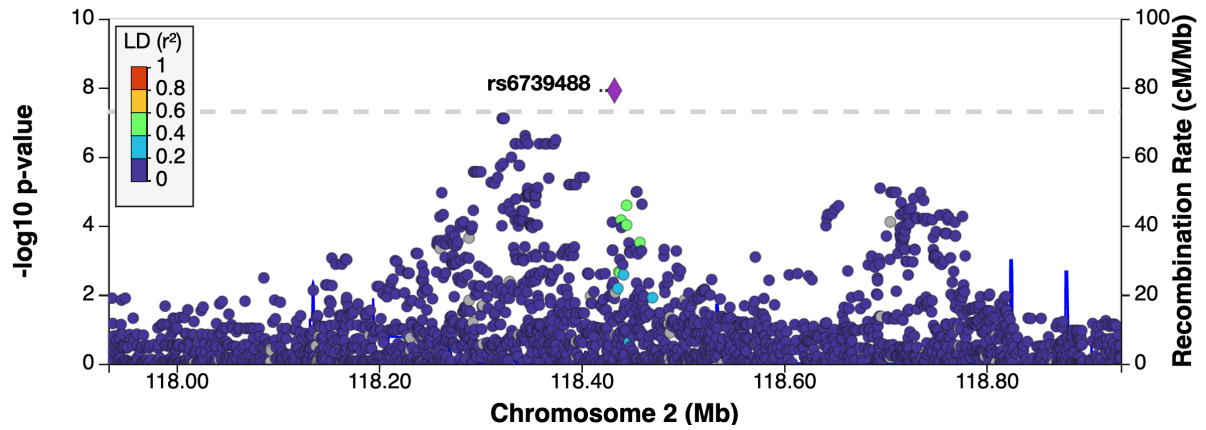

←CCDC93

INSIG2→

←EN1

B

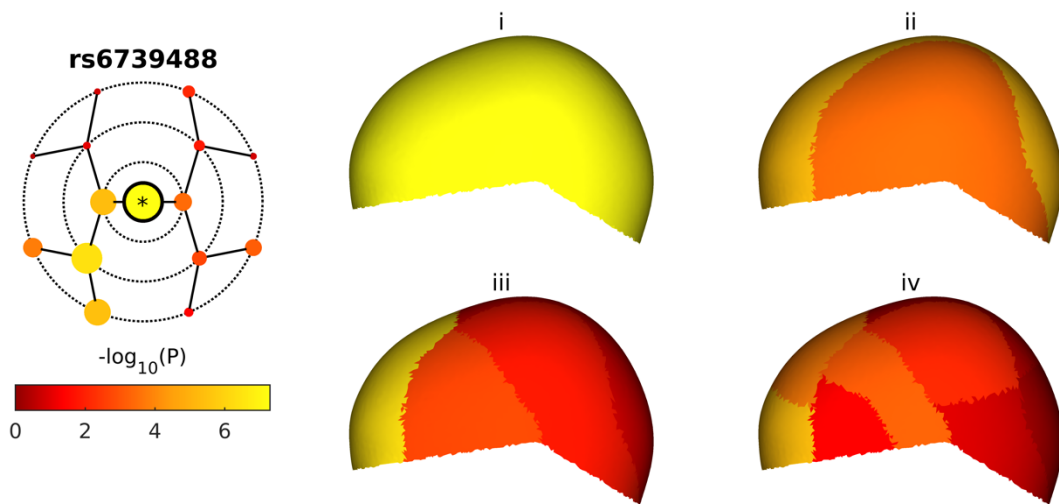

C

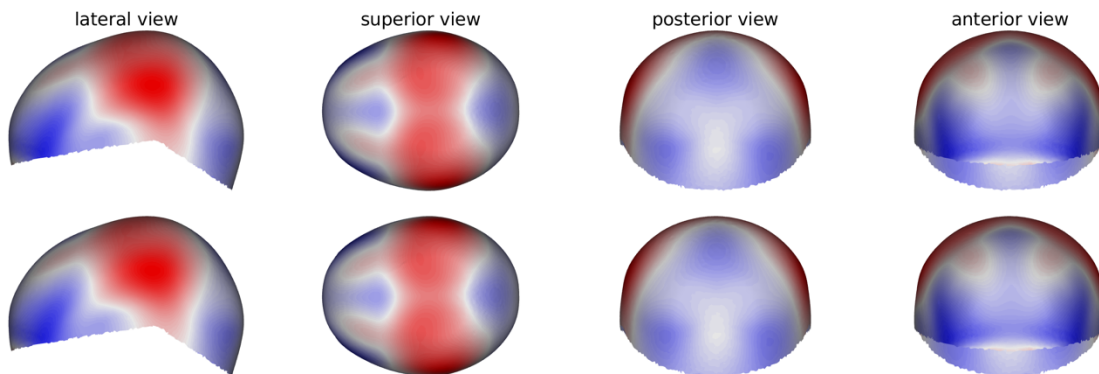

See page 2 for captions

rs17479393

A

CV1

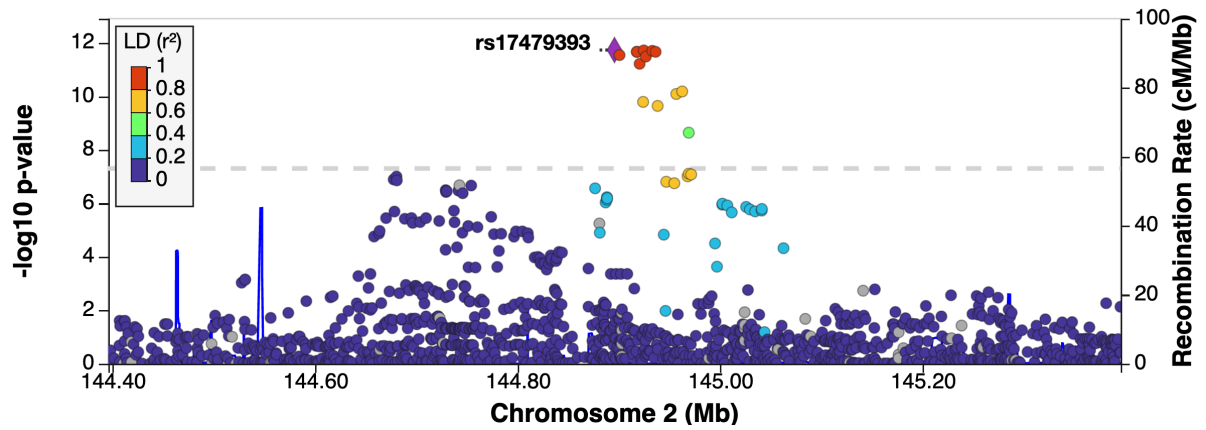

B

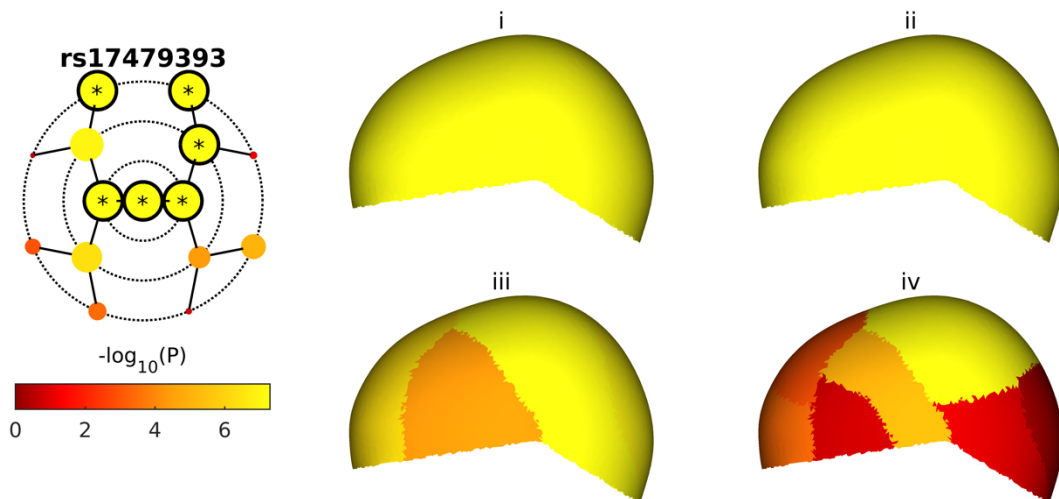

C

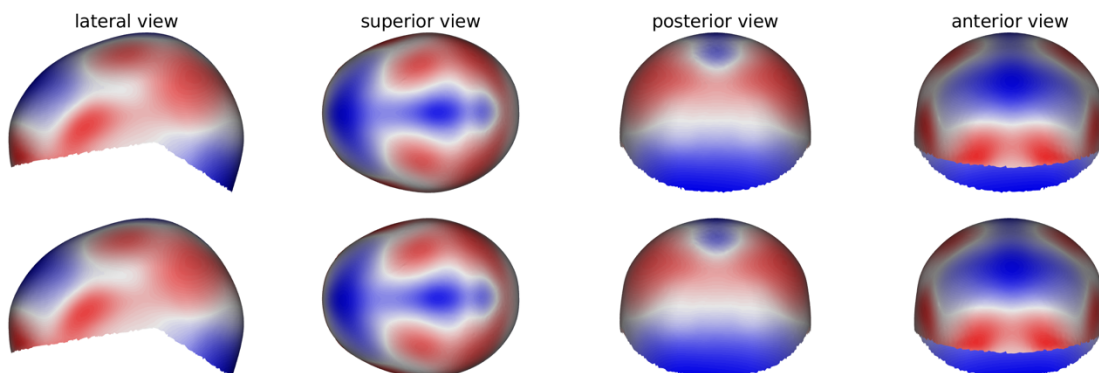

See page 2 for captions

rs970797

A

CV5

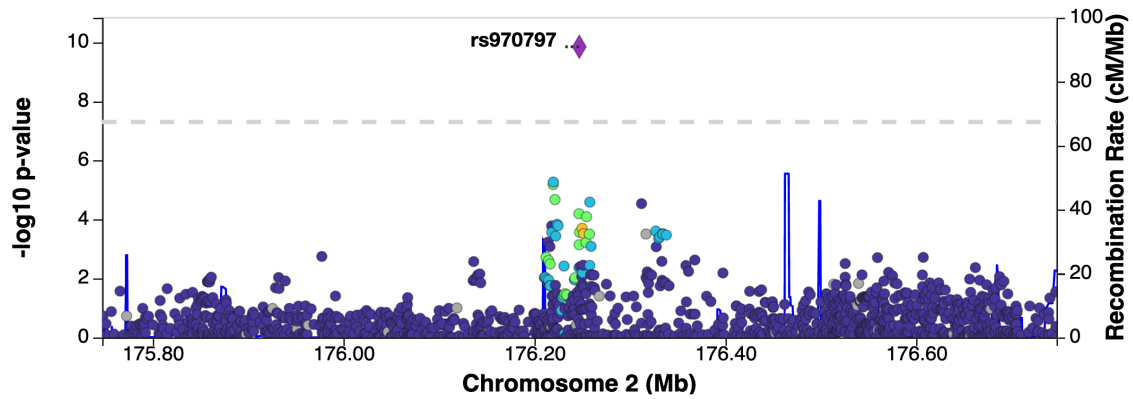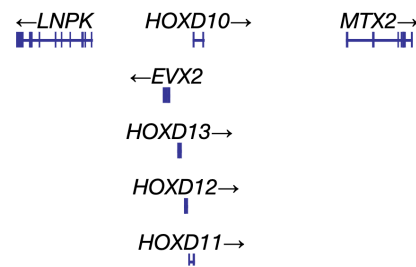

B

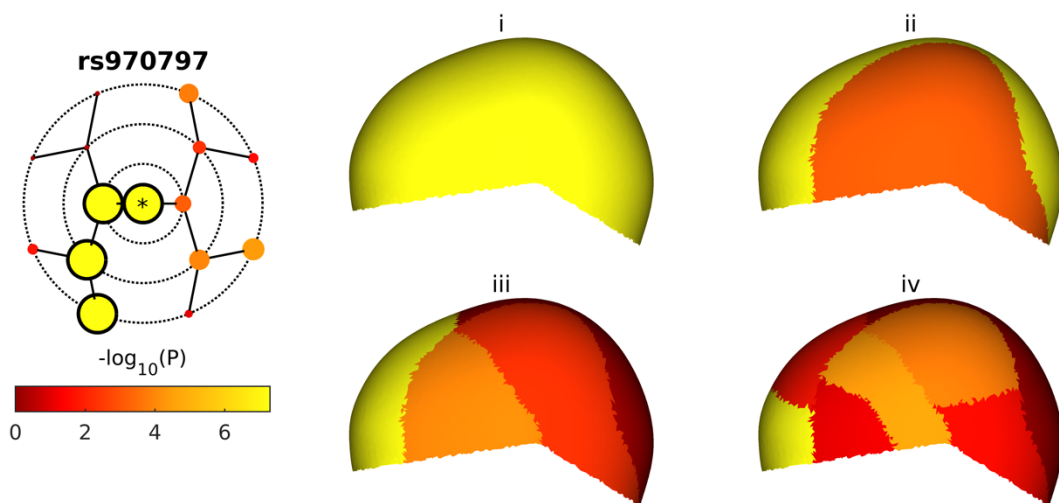

C

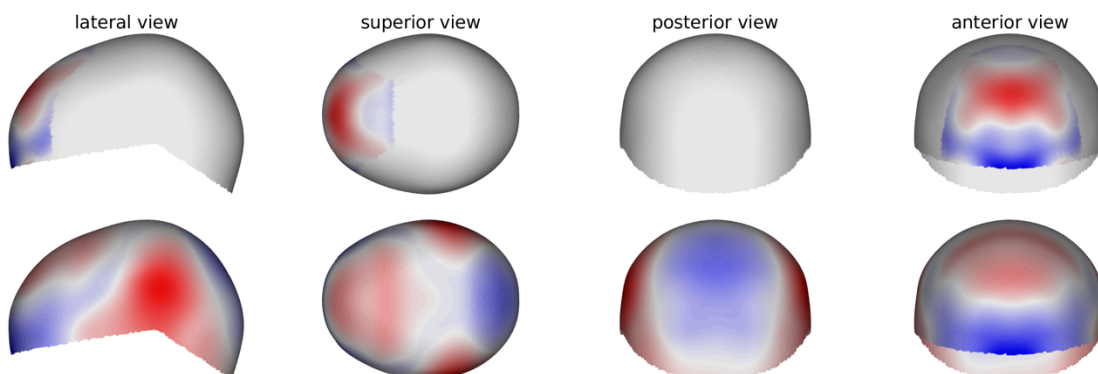

rs7626244

A

CV5

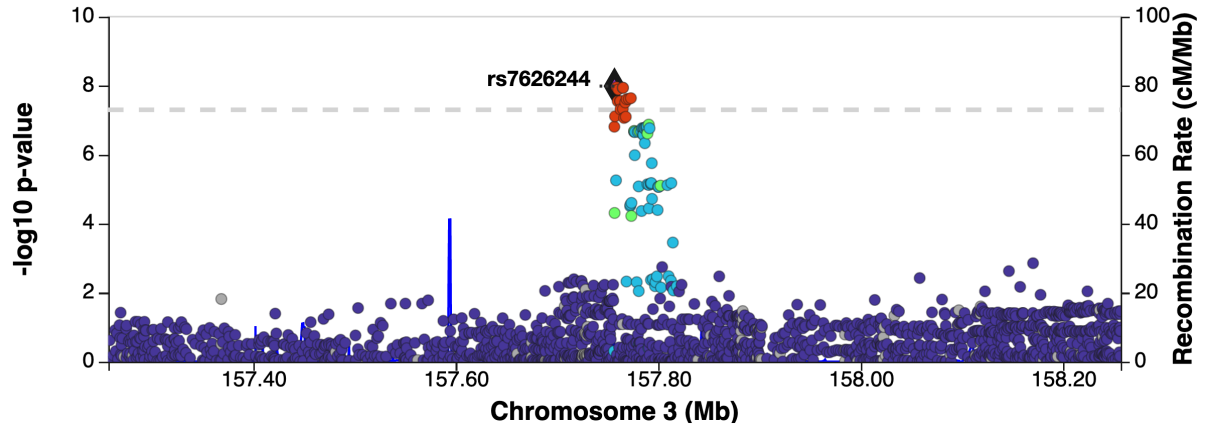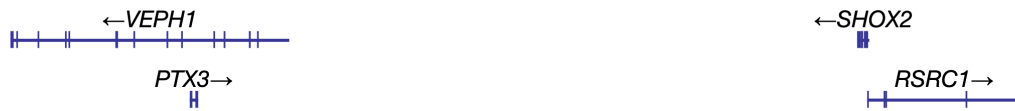

B

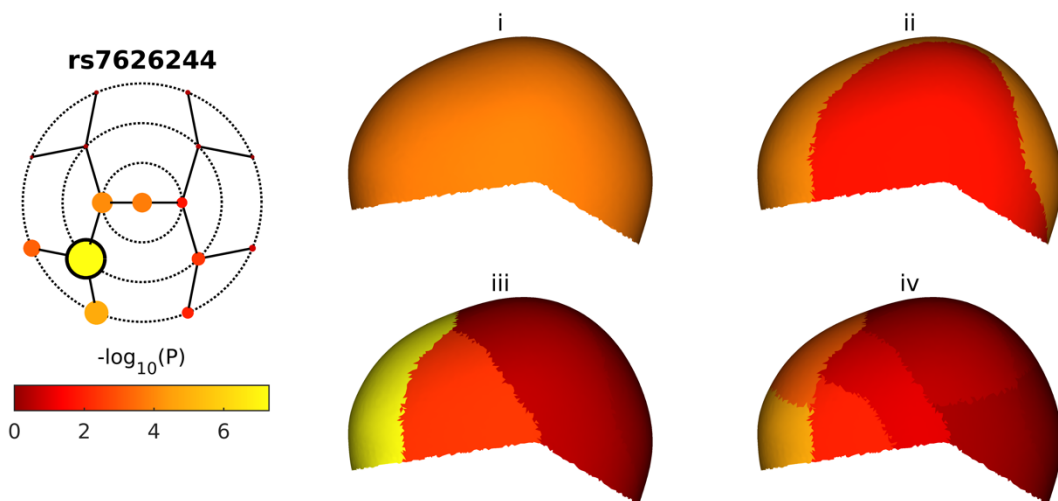

C

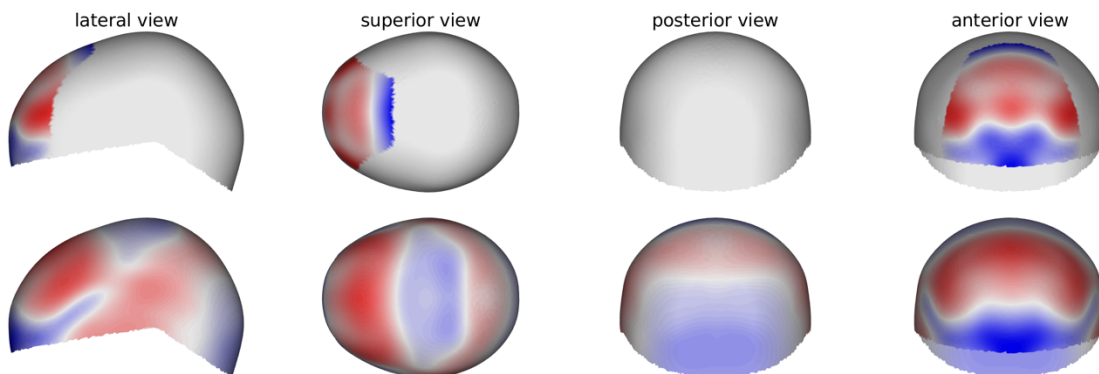



rs35614773

A

CV1

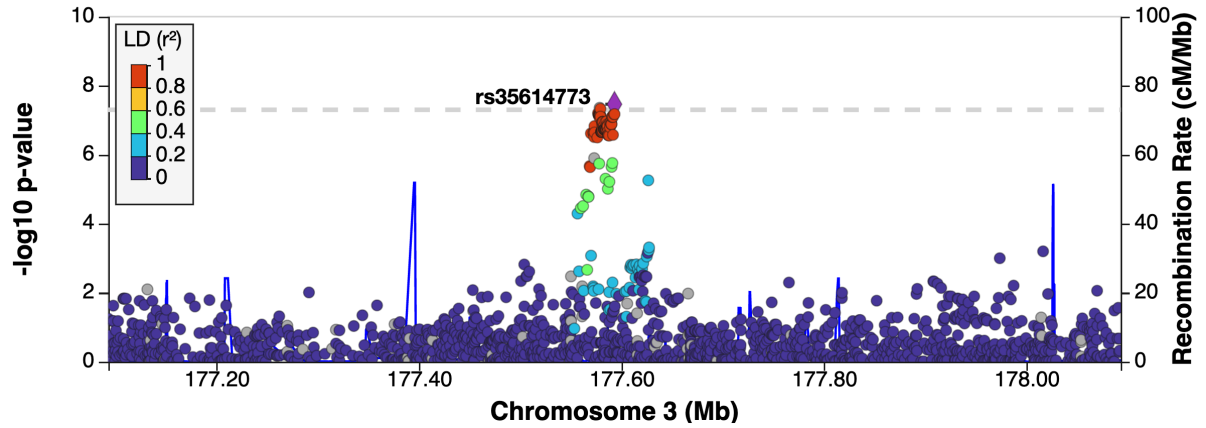

B

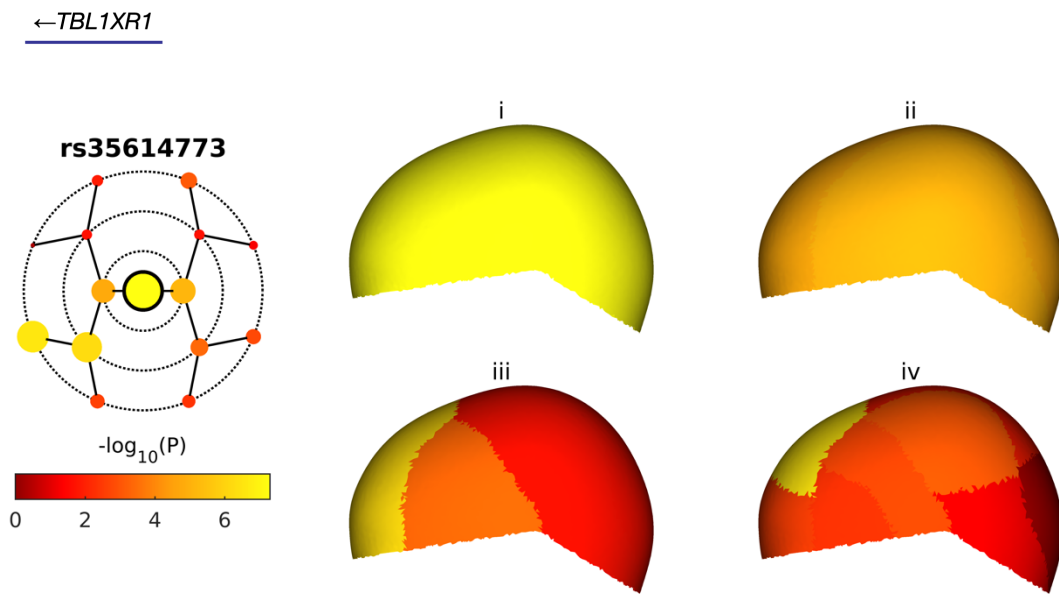

C

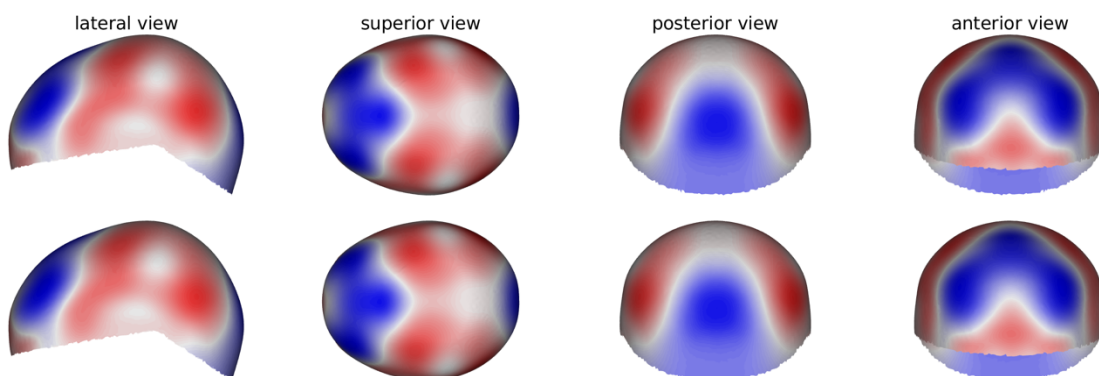

rs1351637

A

CV8

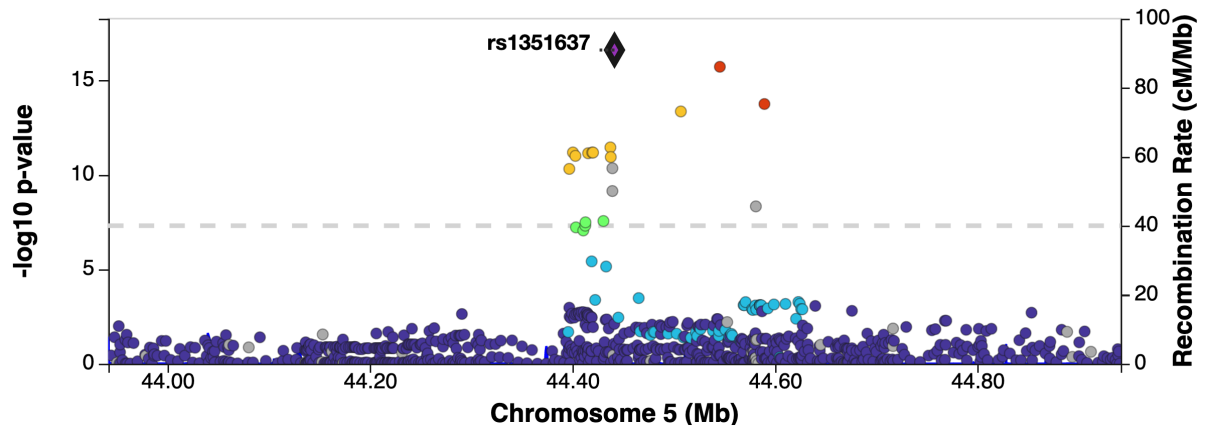

←FGF10

MRPS30→

B

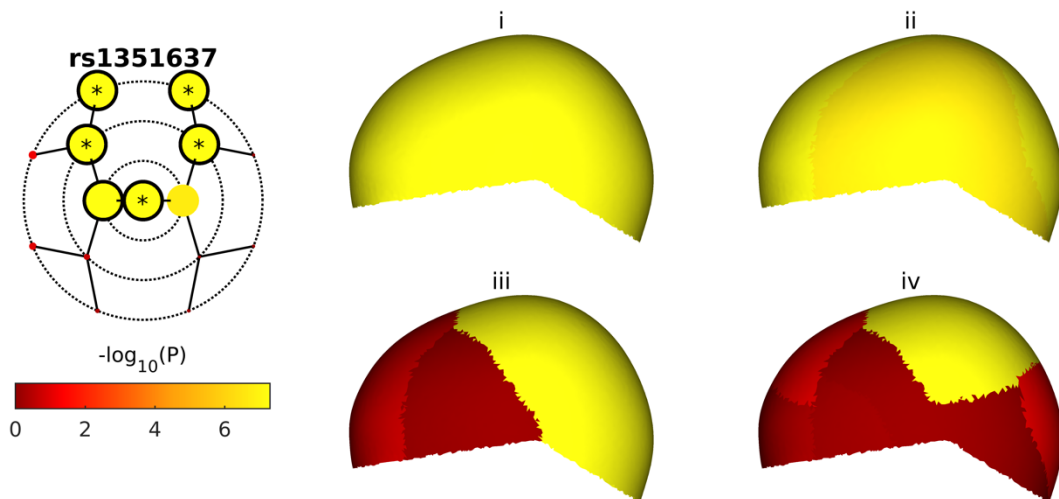

C

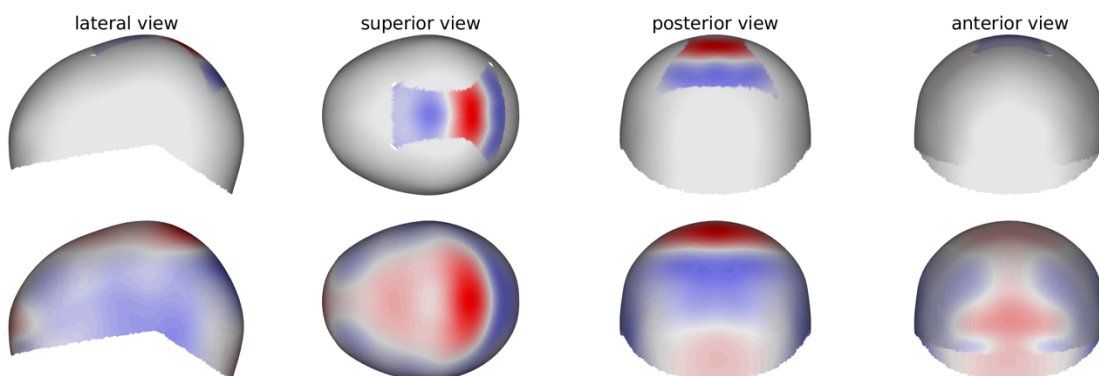

rs3822730

A

CV2

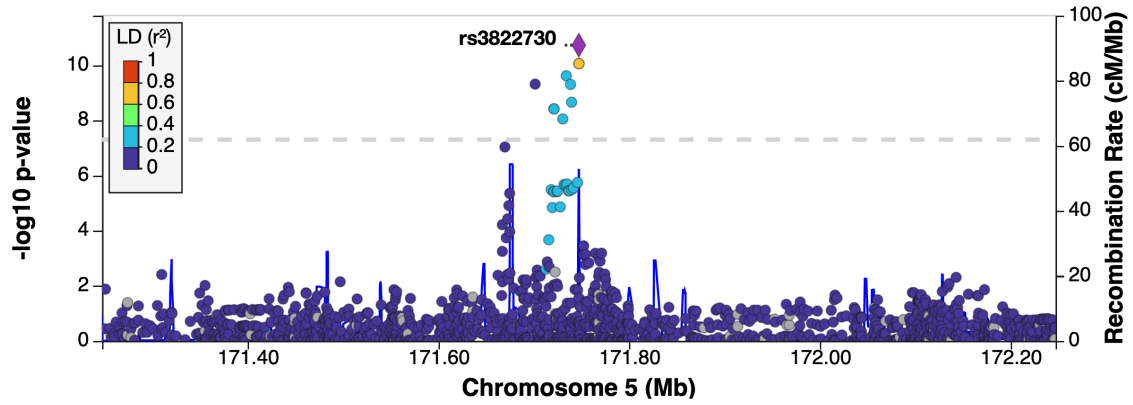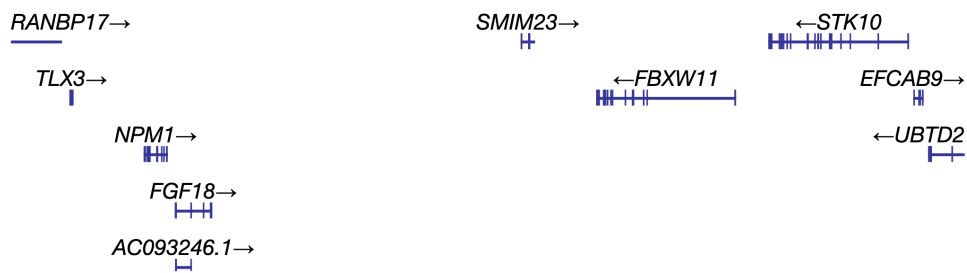

B

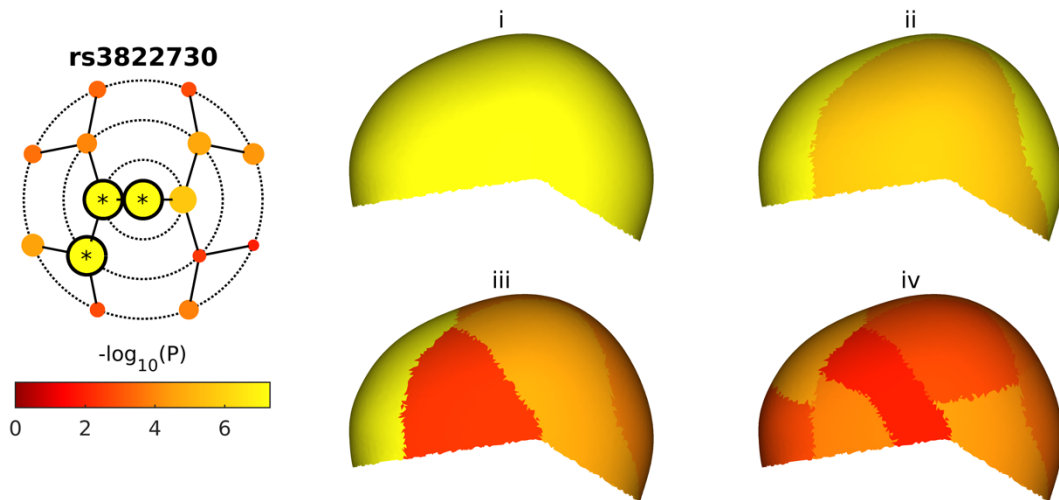

C

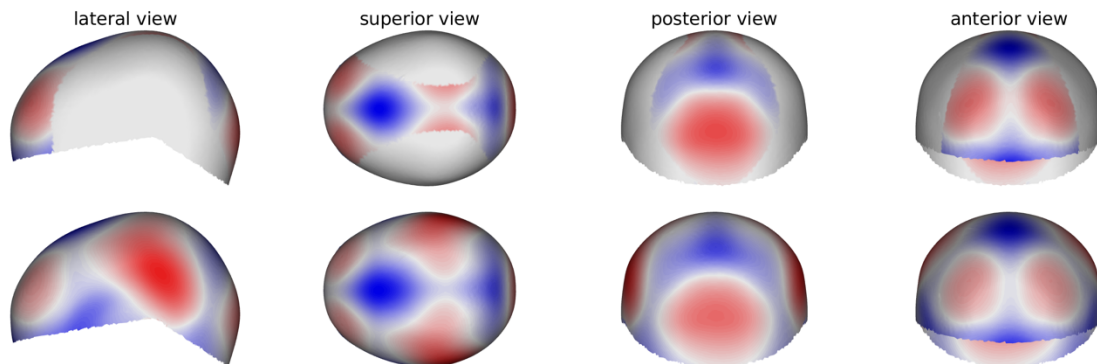

rs4714260

A

CV1

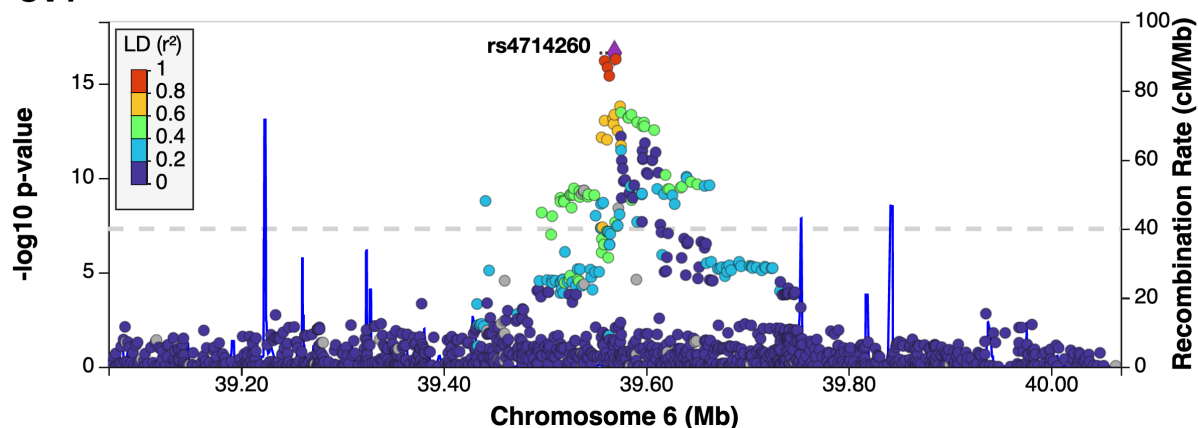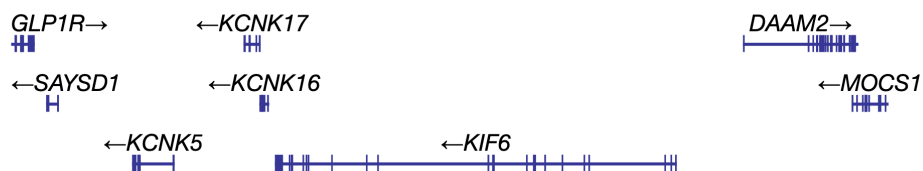

B

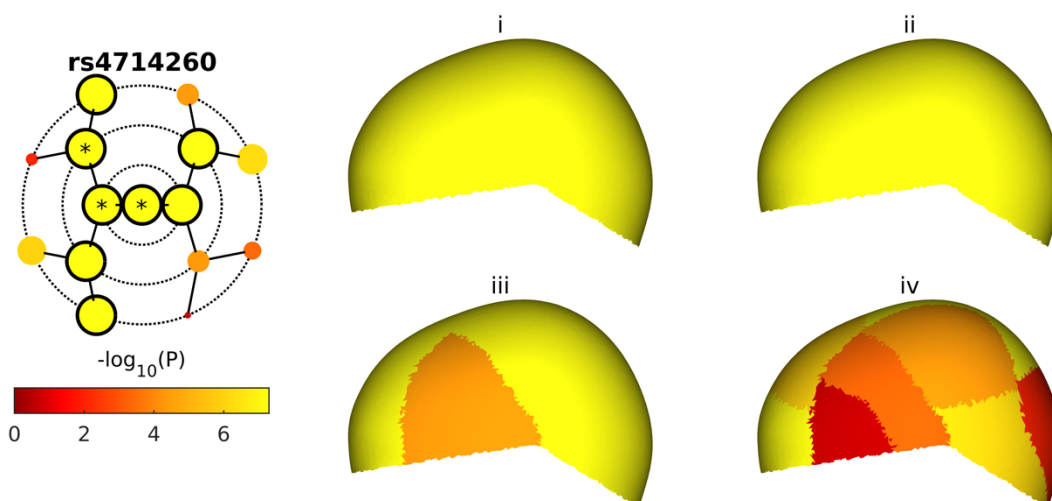

C

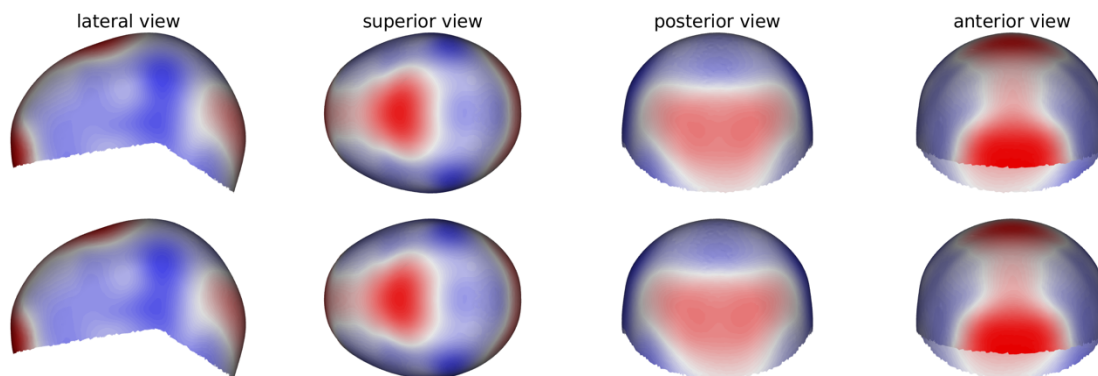

rs3799970

A

CV1

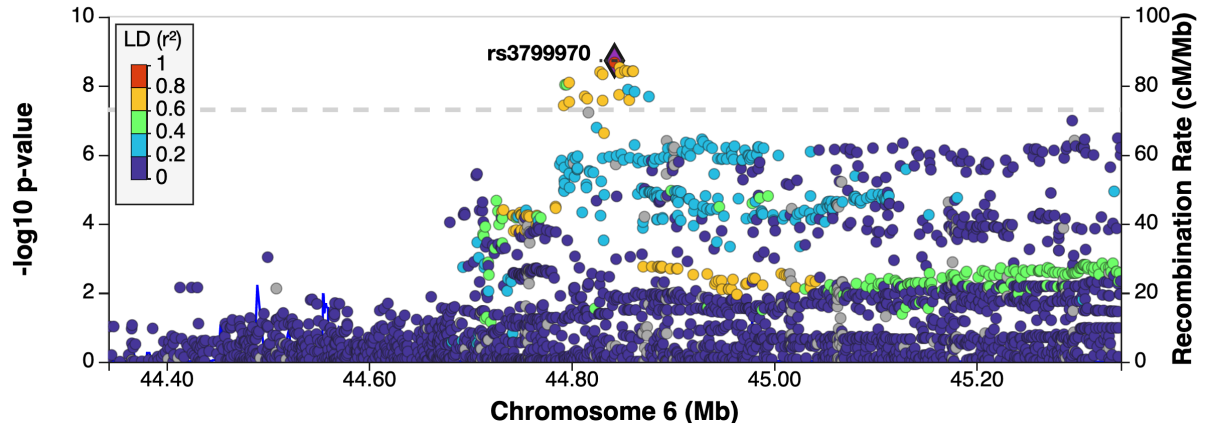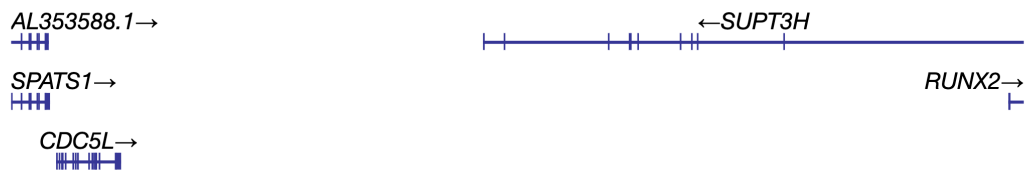

B

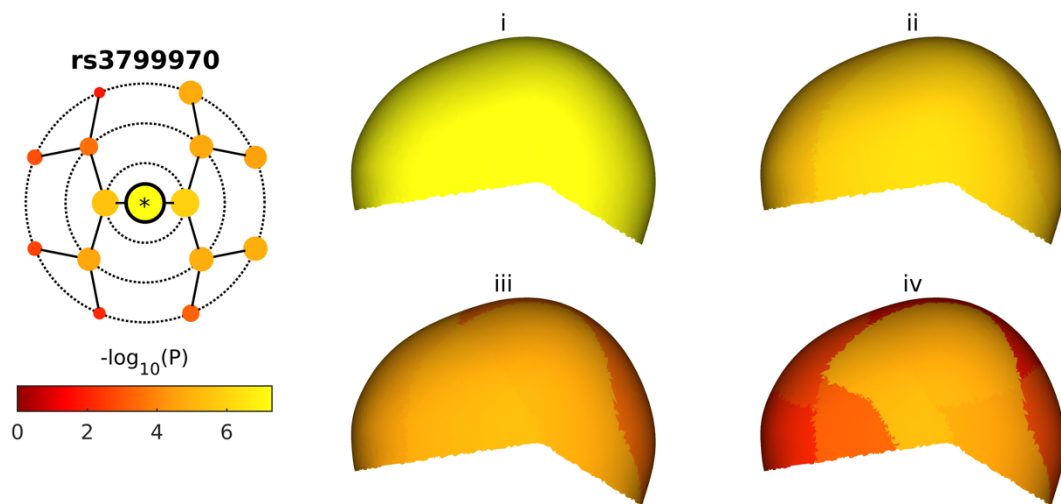

C

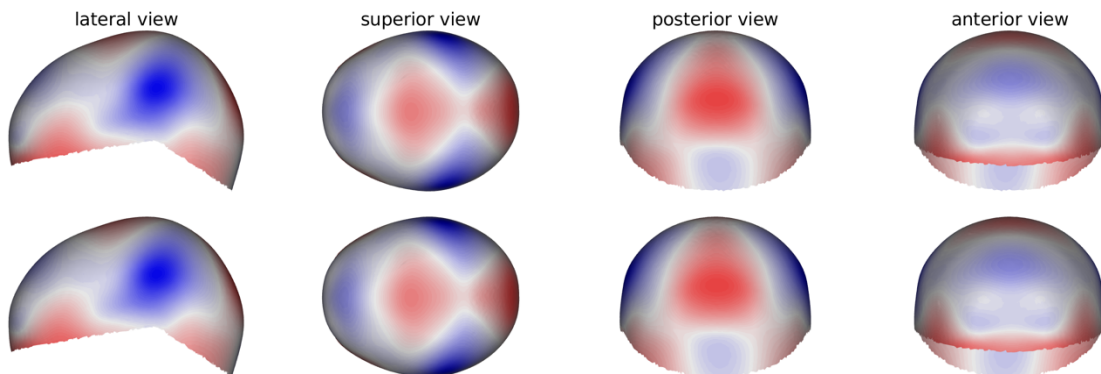

rs9491697

A

CV3

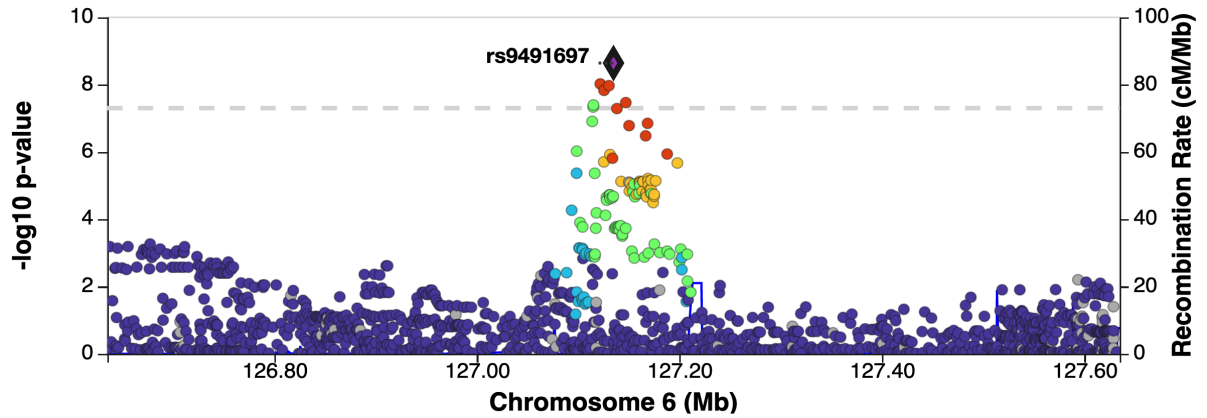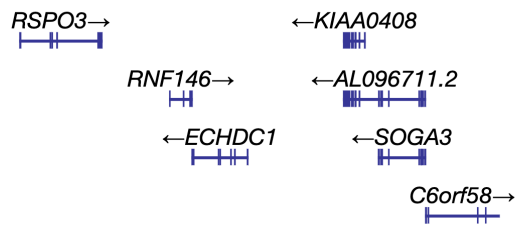

B

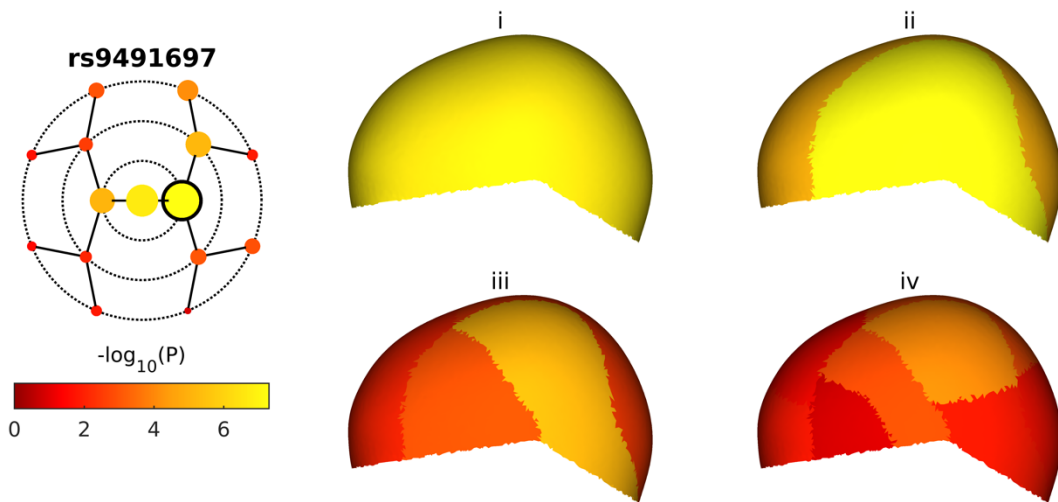

C

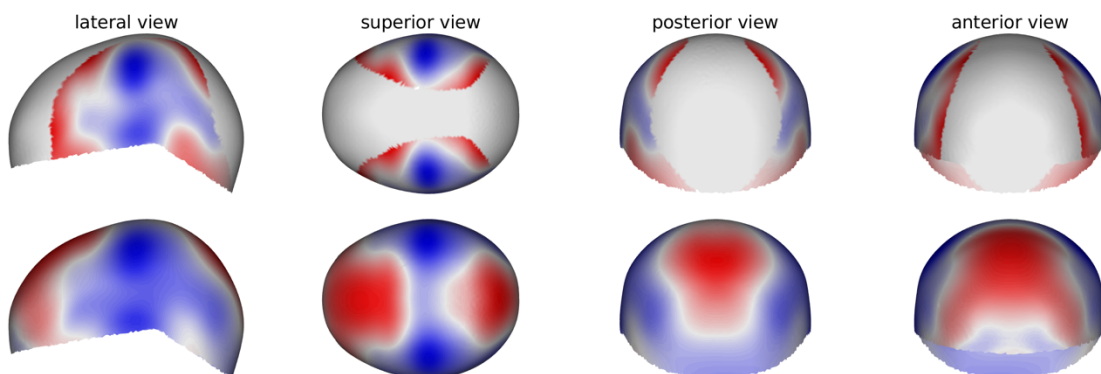

See page 2 for captions

rs296418

A

CV11

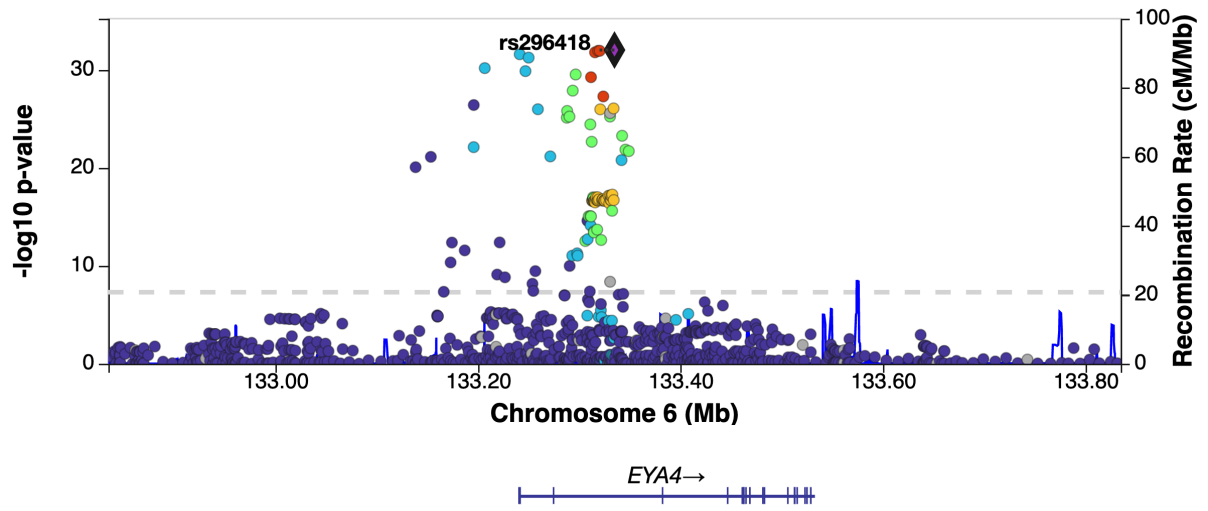

B

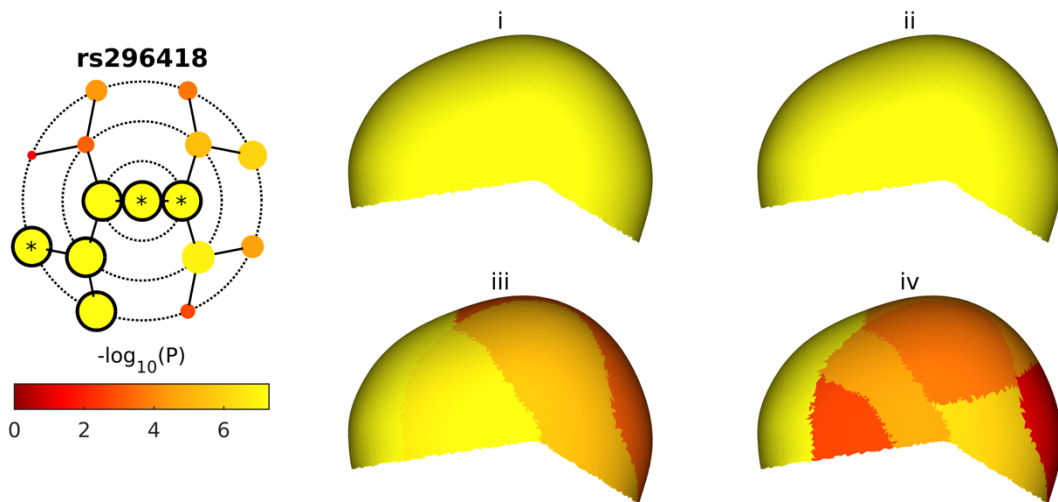

C

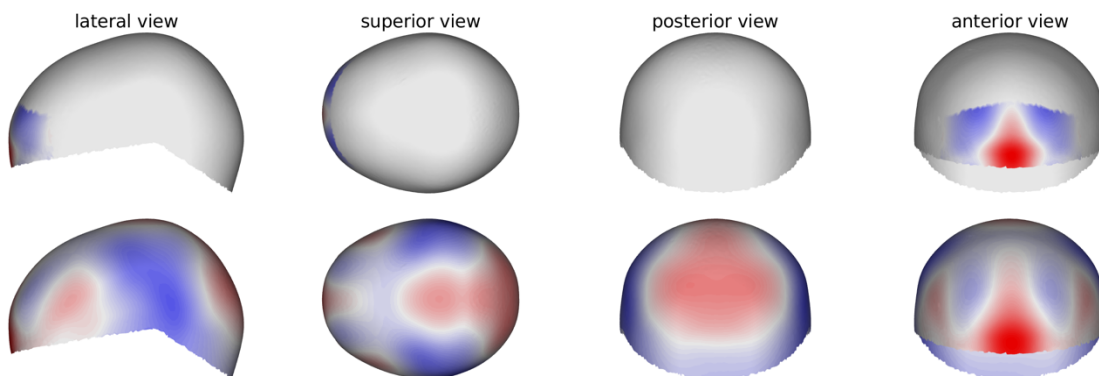

rs148673350

A

CV1

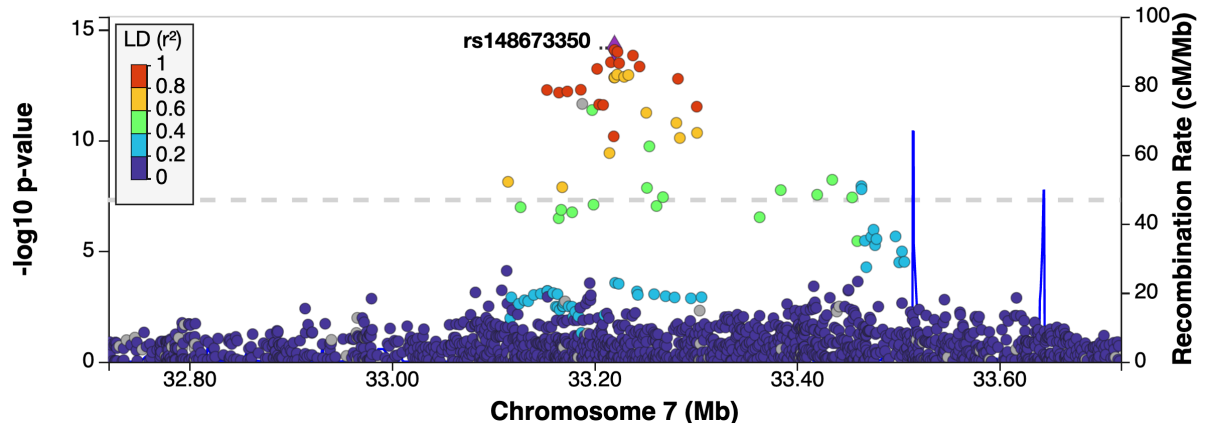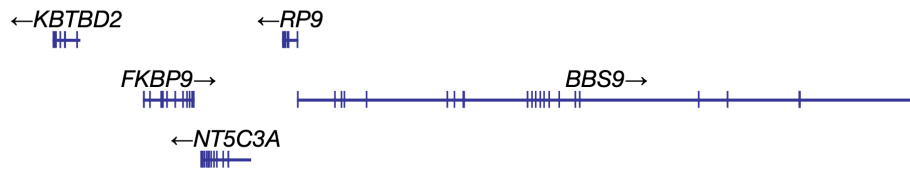

B

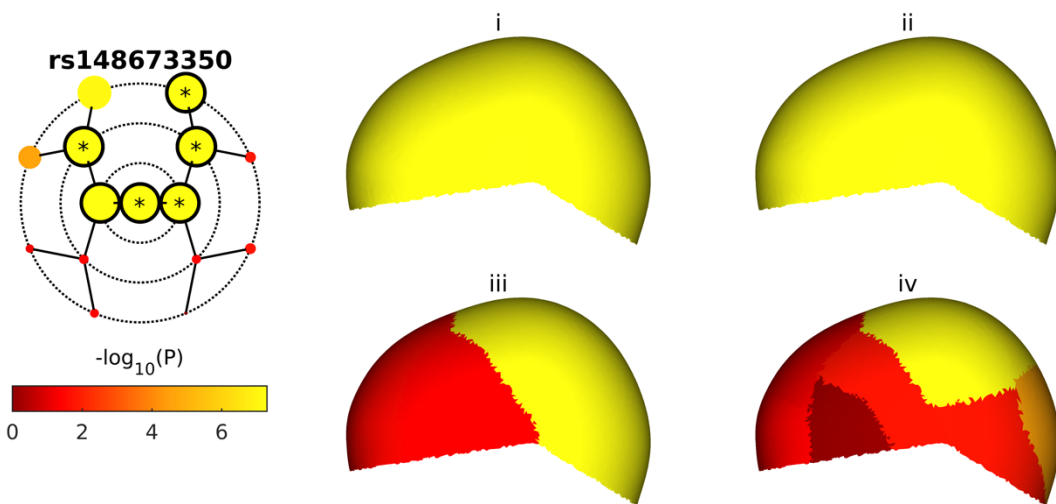

C

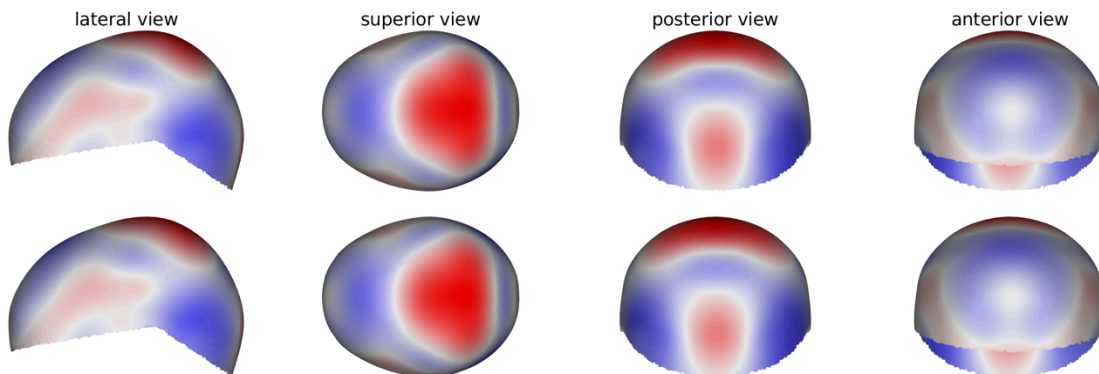



rs202055590

A

CV1

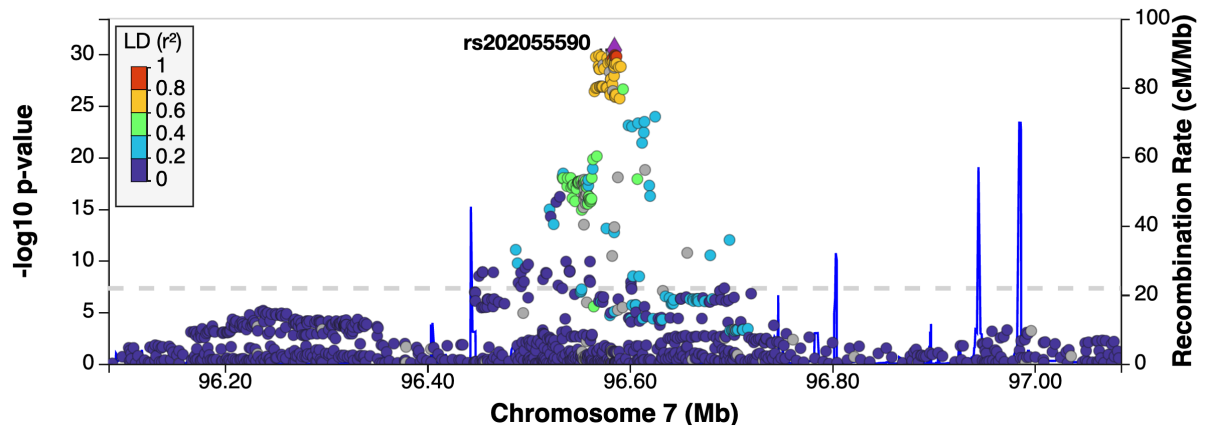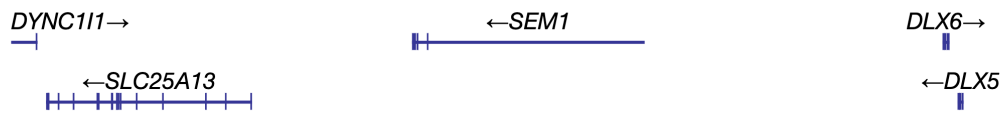

B

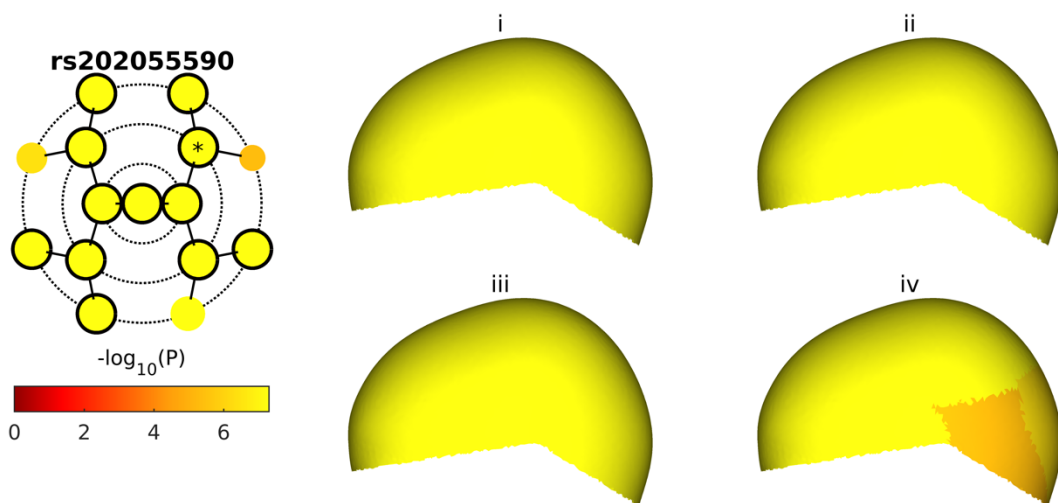

C

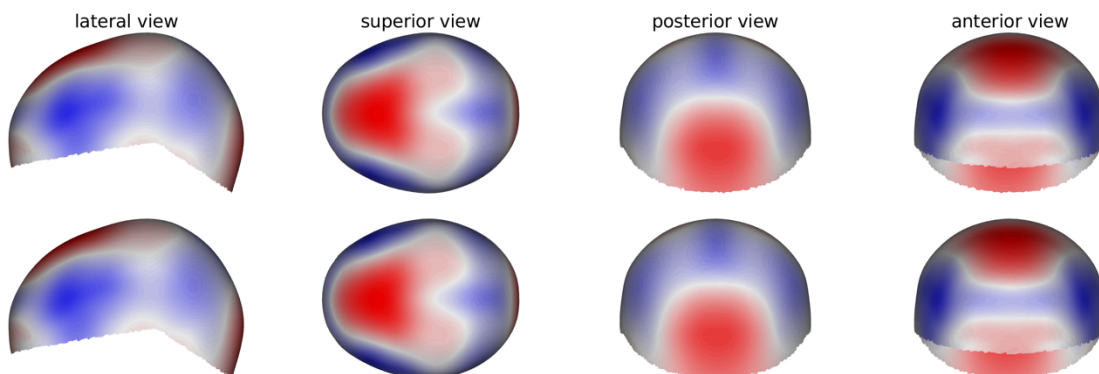

rs1581525

A

CV12

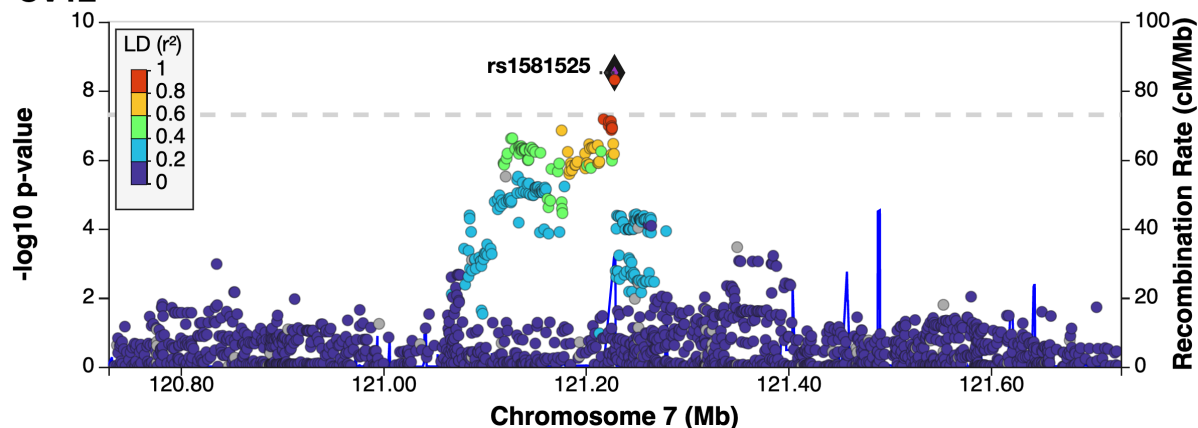

B

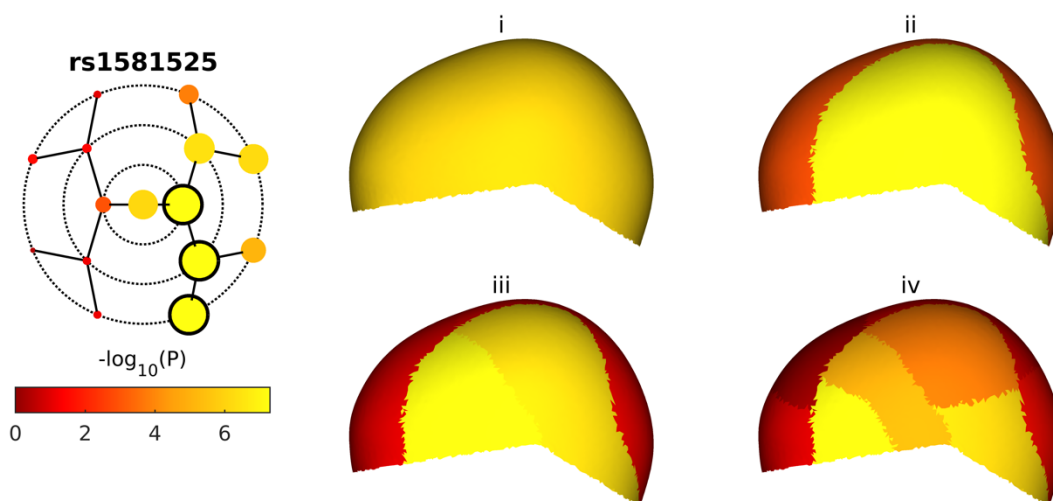

C

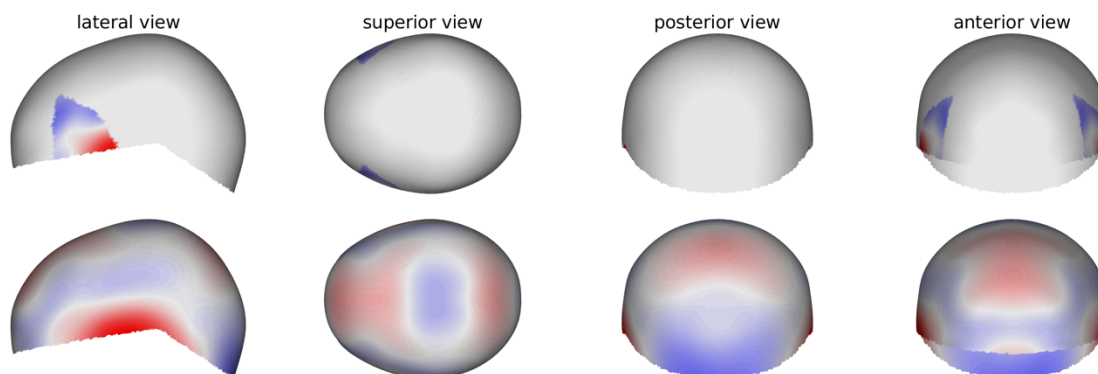

rs147676525

A

CV15

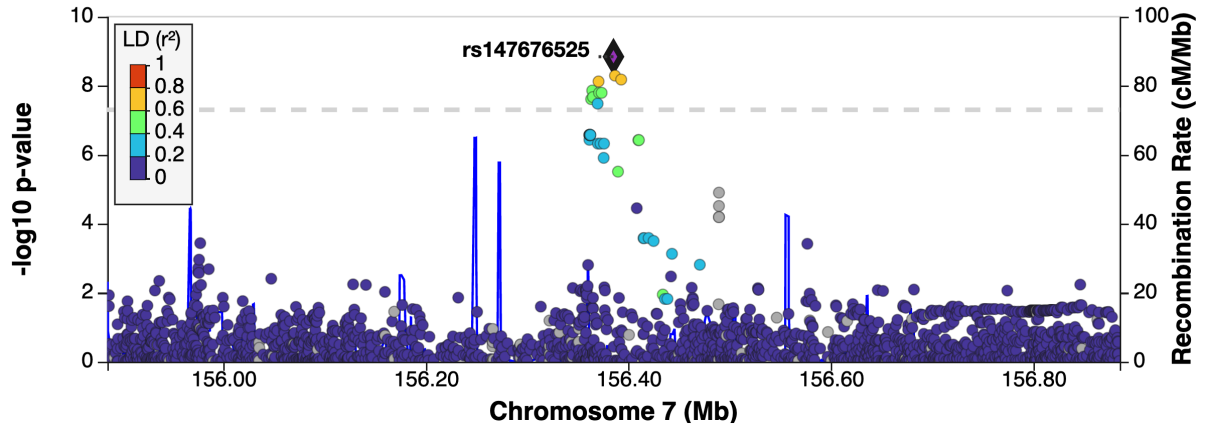

B

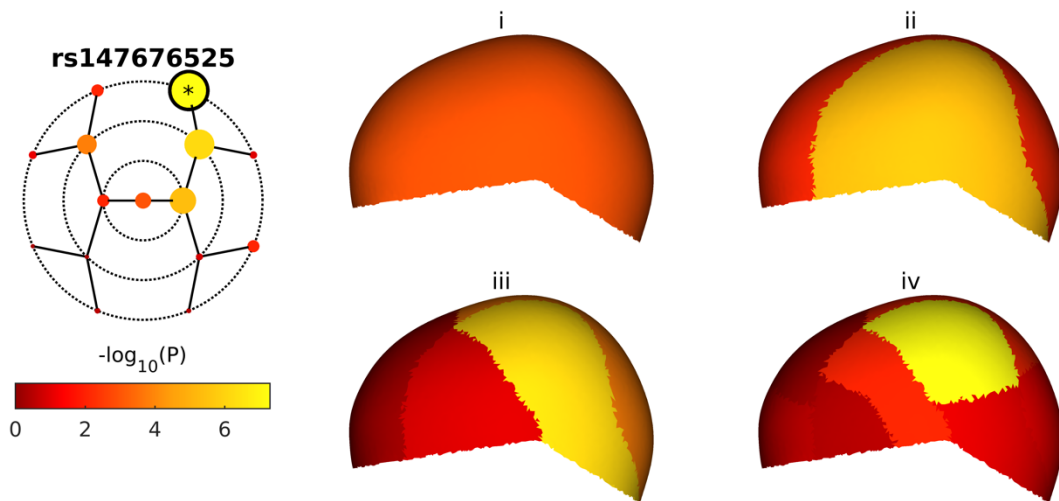

C

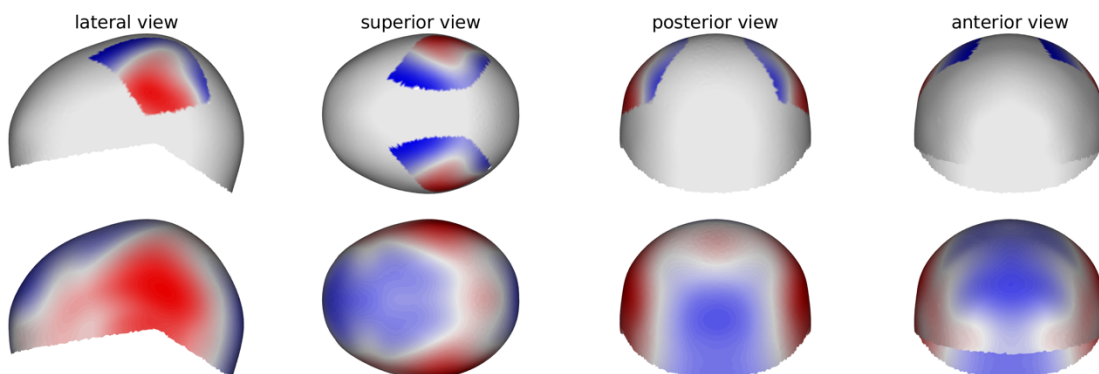

rs7813717

A

CV1

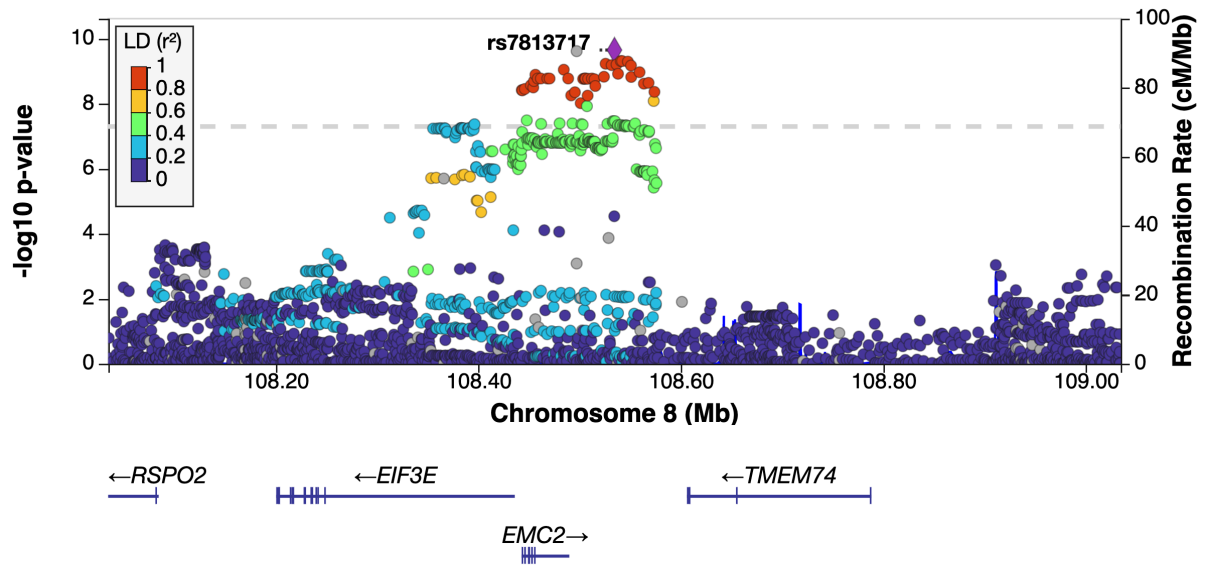

B

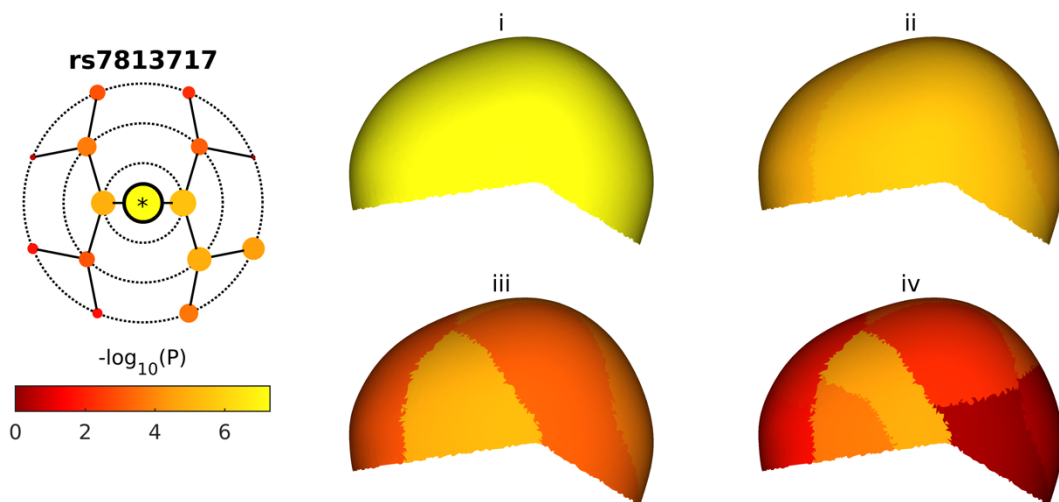

C

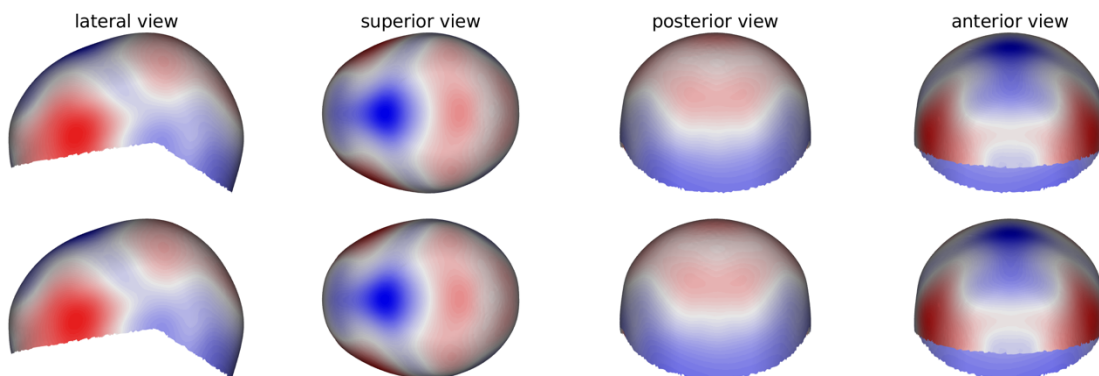

rs10120728

A

CV5

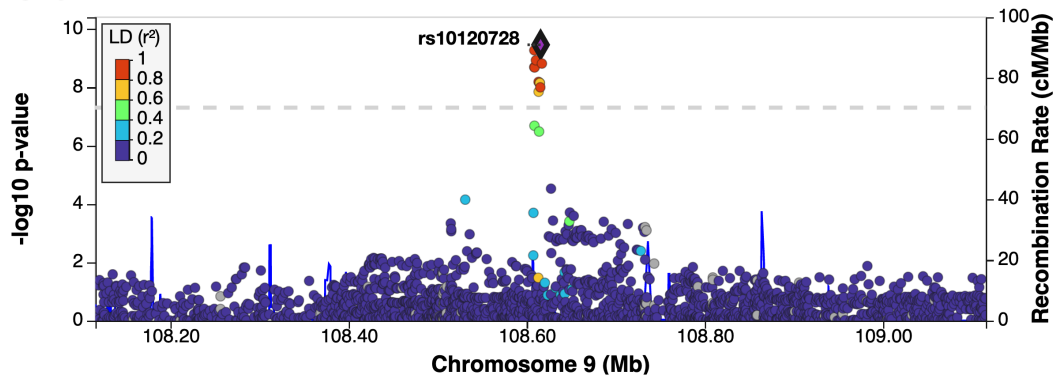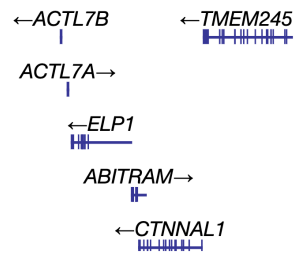

B

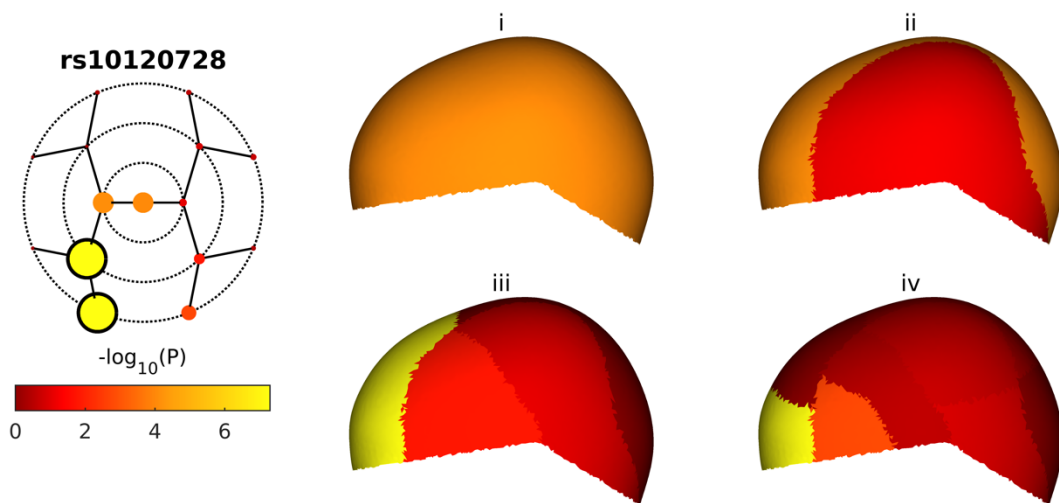

C

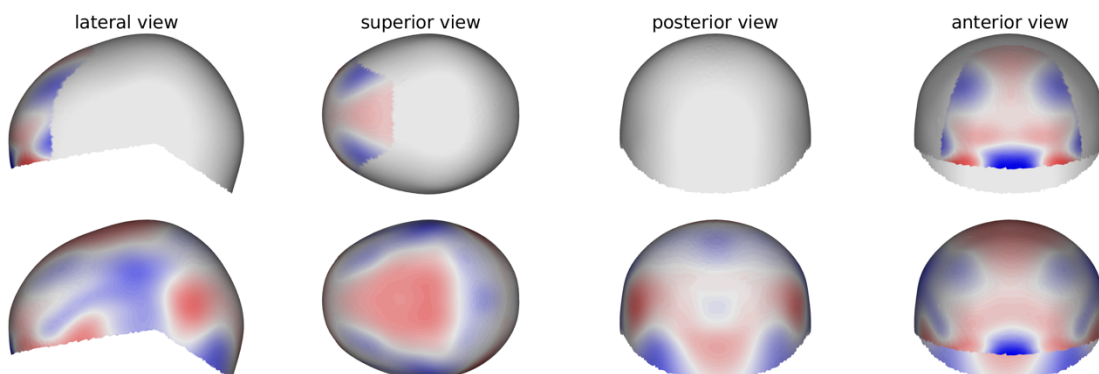

rs7920484

A

CV1

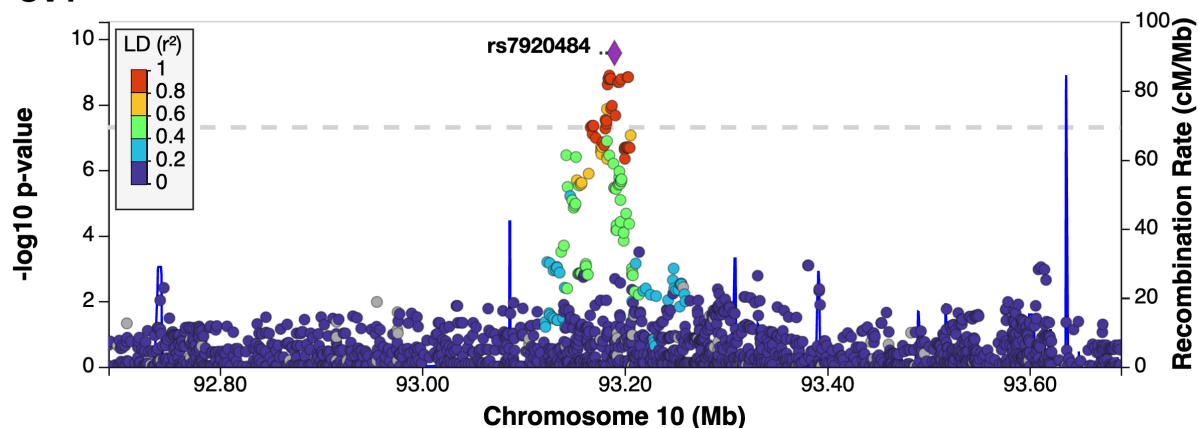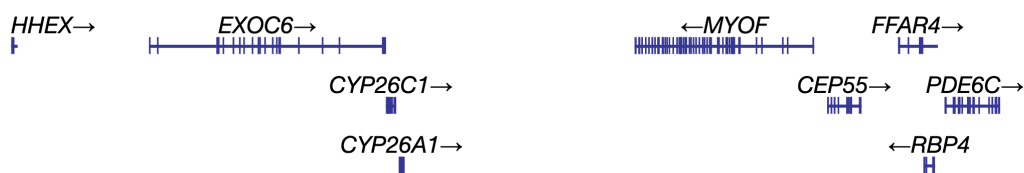

B

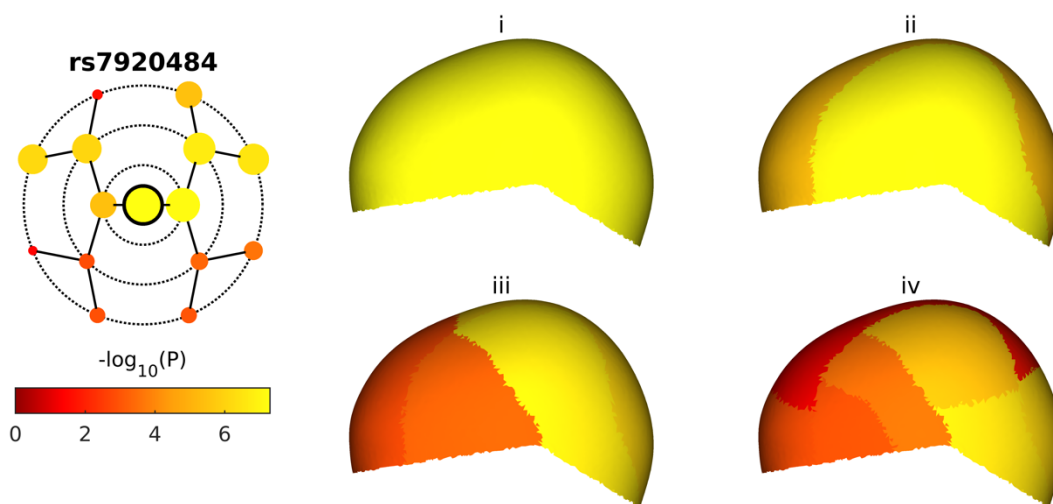

C

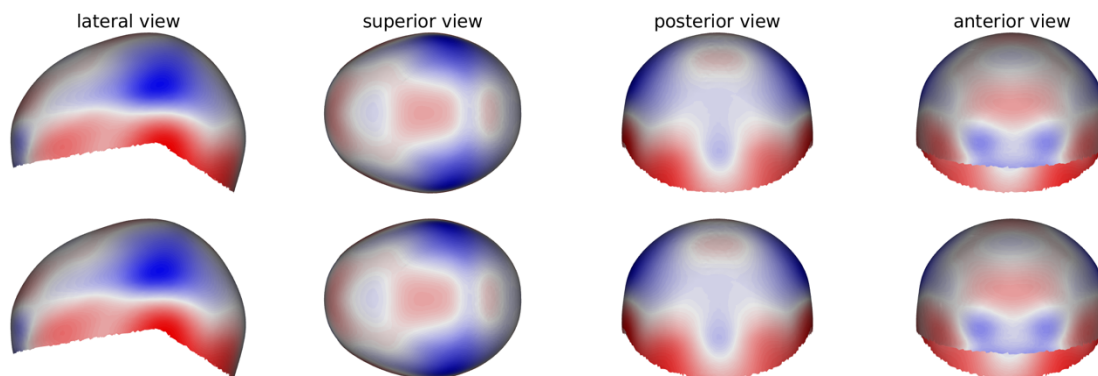

rs61920200

A

CV1

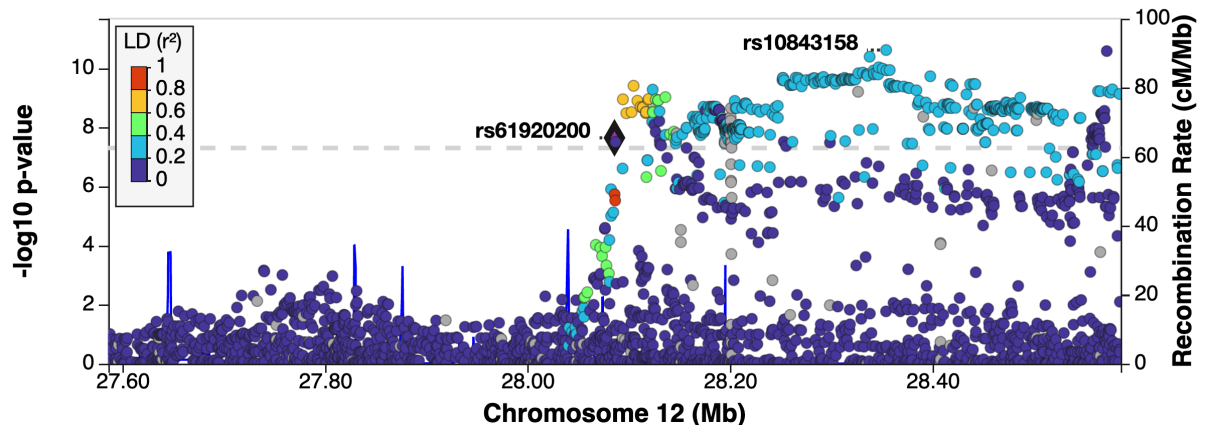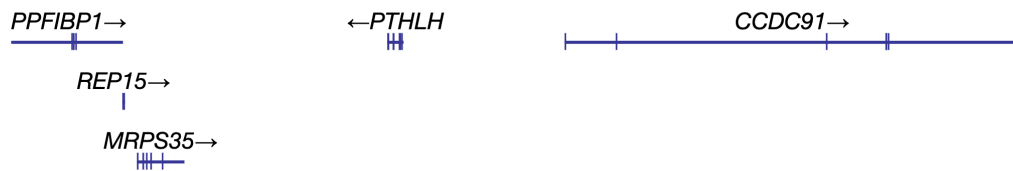

B

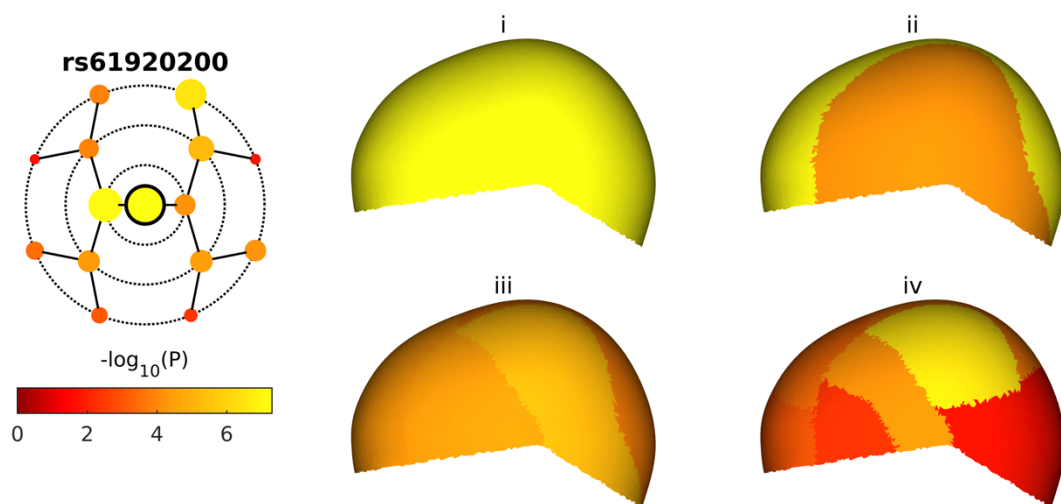

C

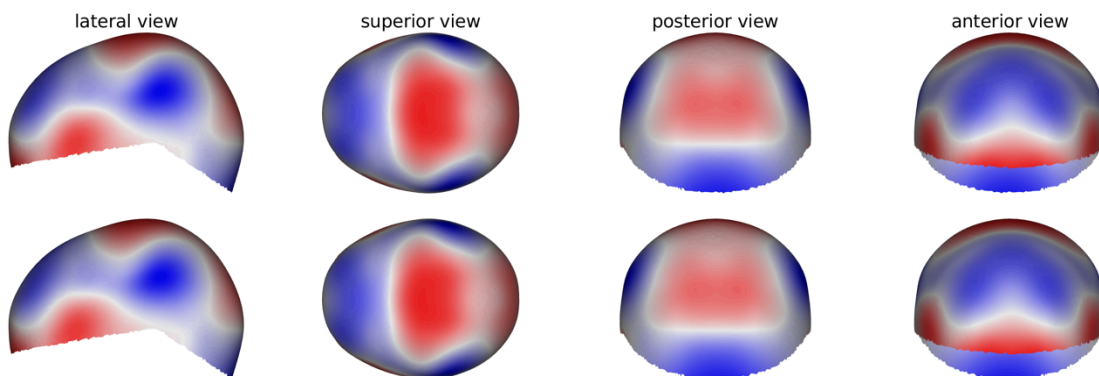

rs10843158

A

CV1

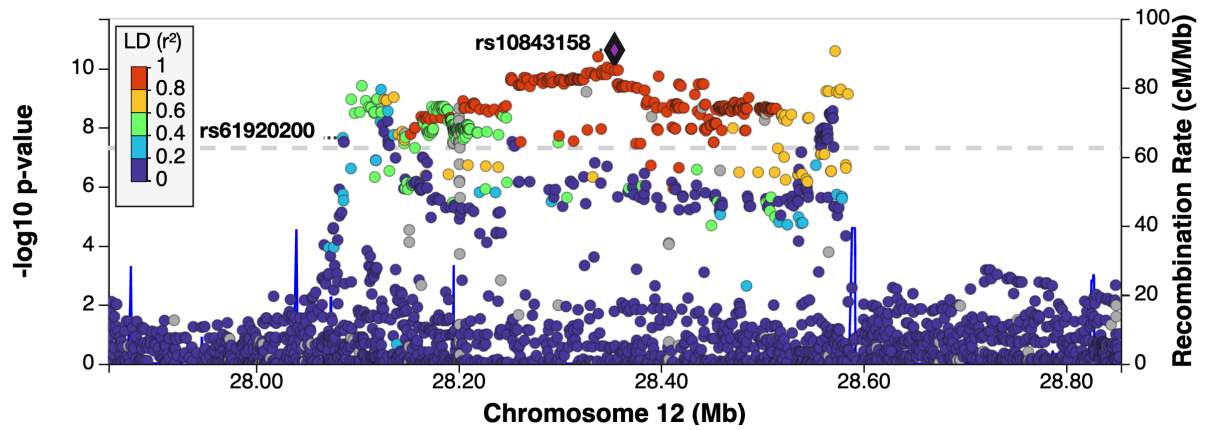

B

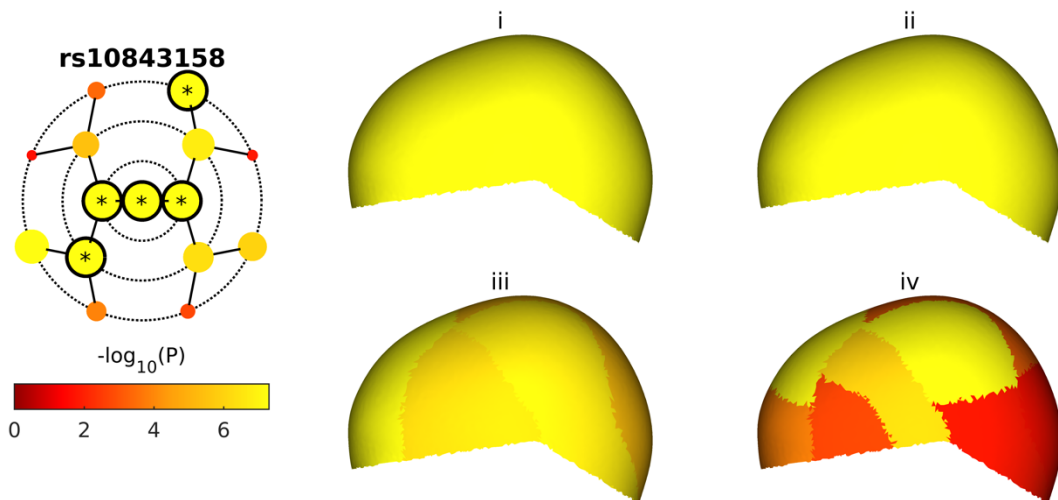

C

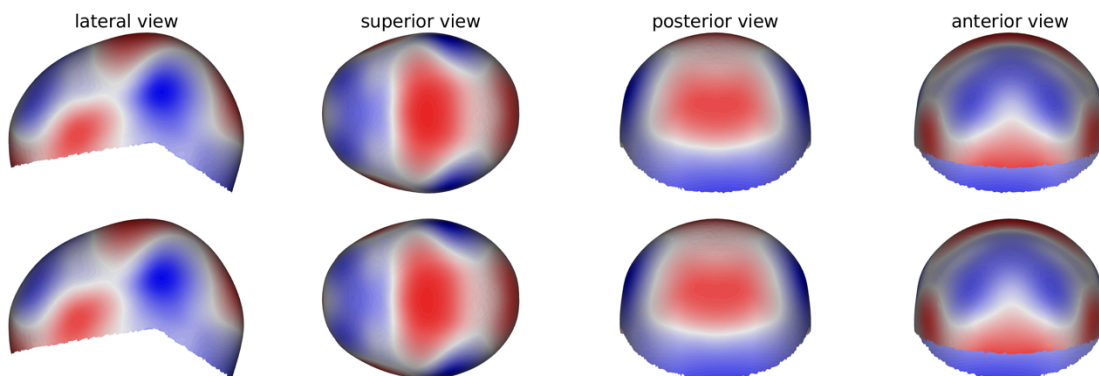



rs151174669

A

CV11

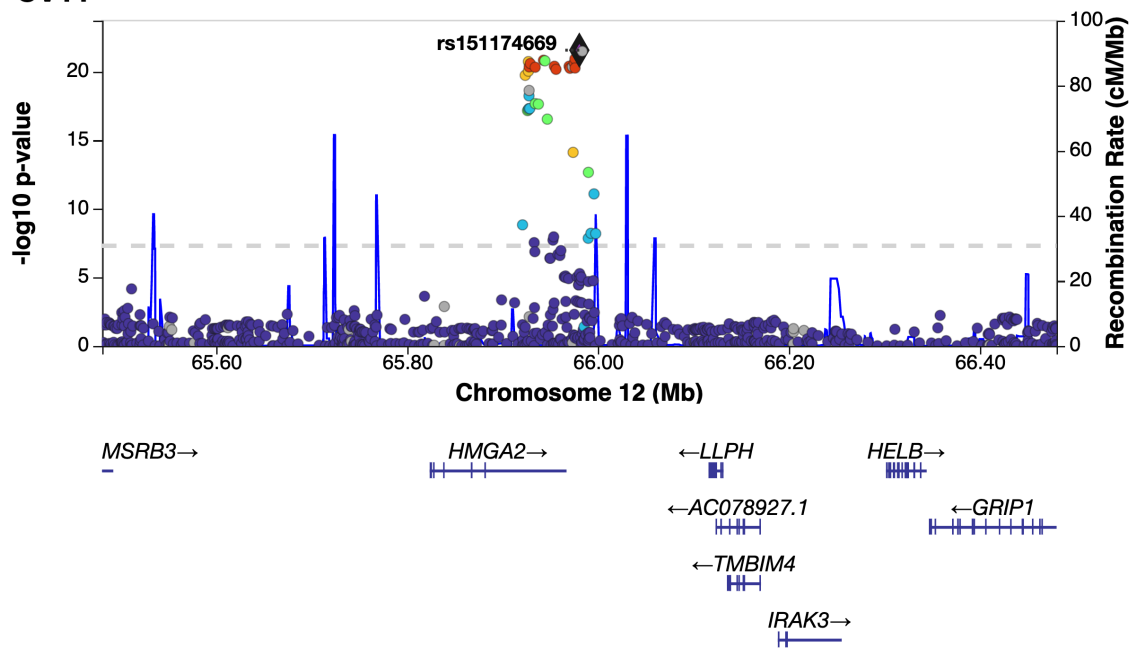

B

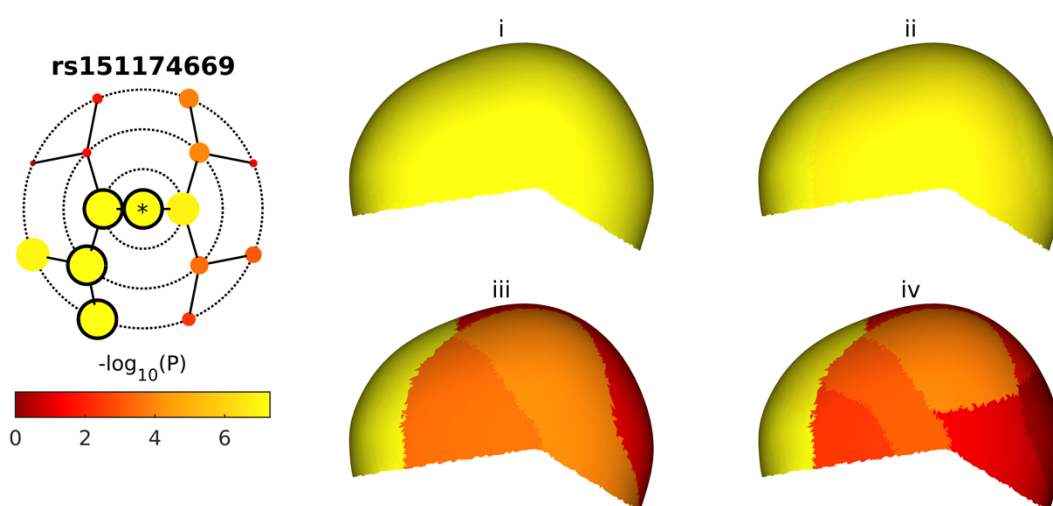

C

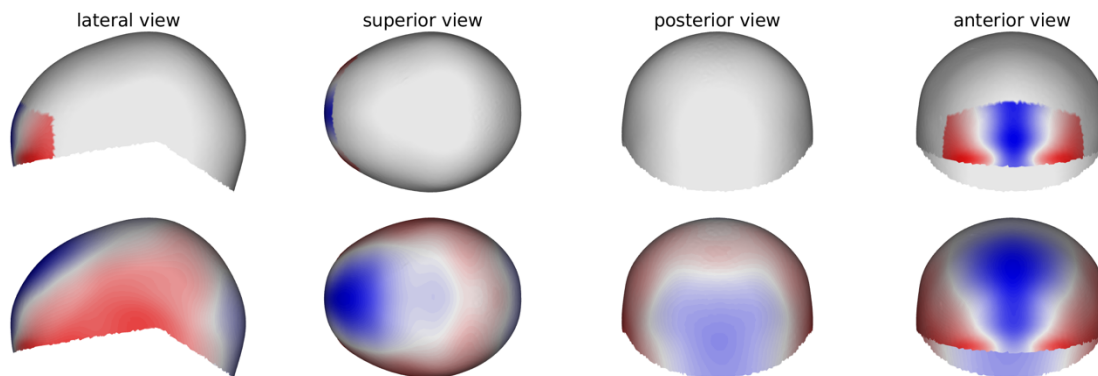

rs11609649

A

CV5

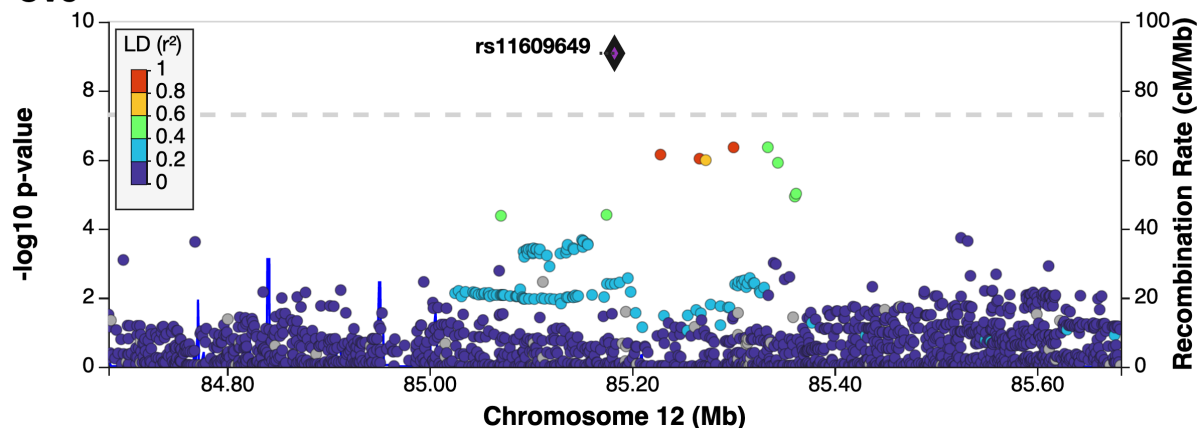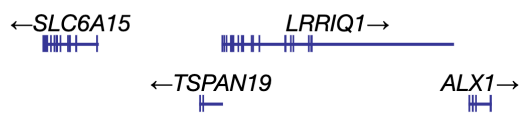

B

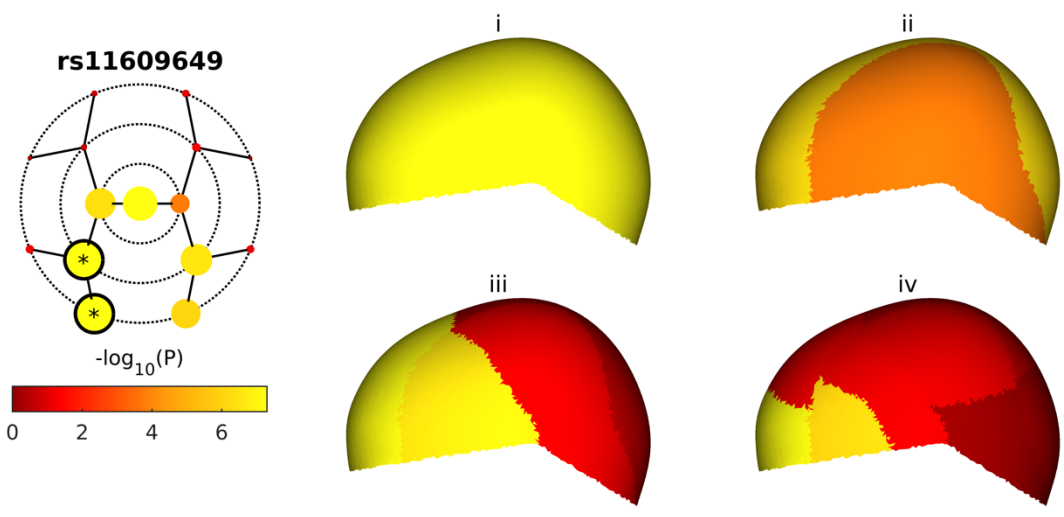

C

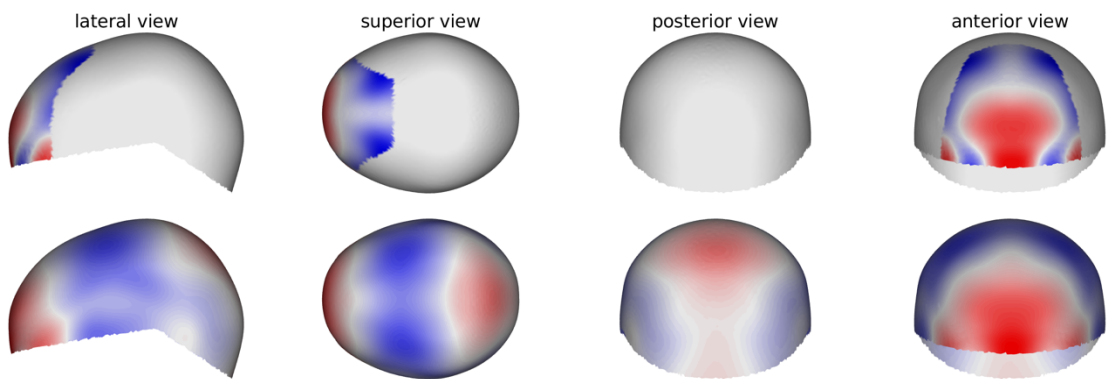

rs1034266

A

CV2

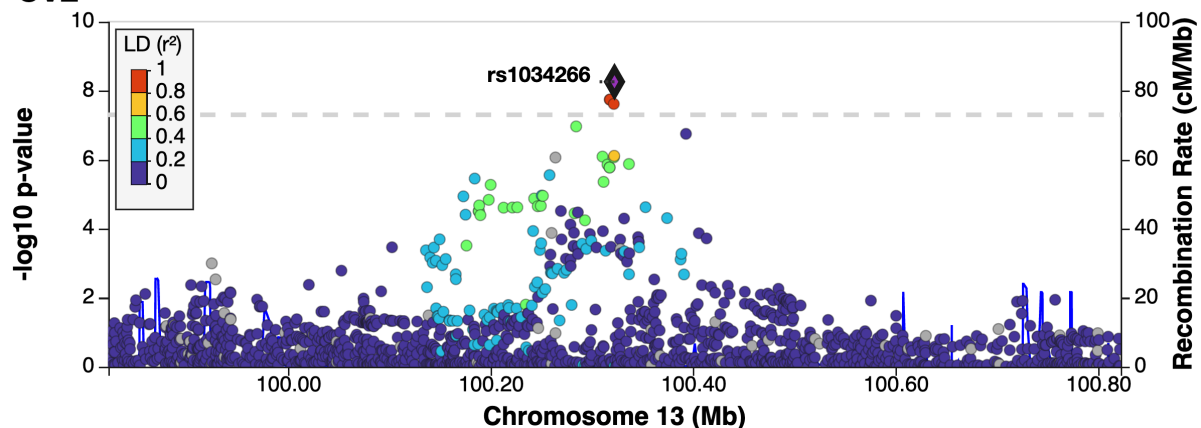

B

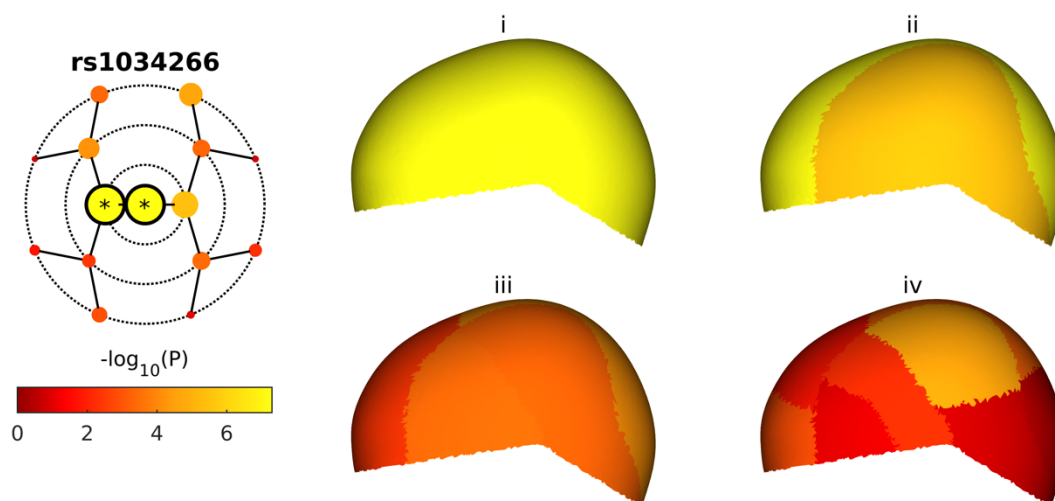

C

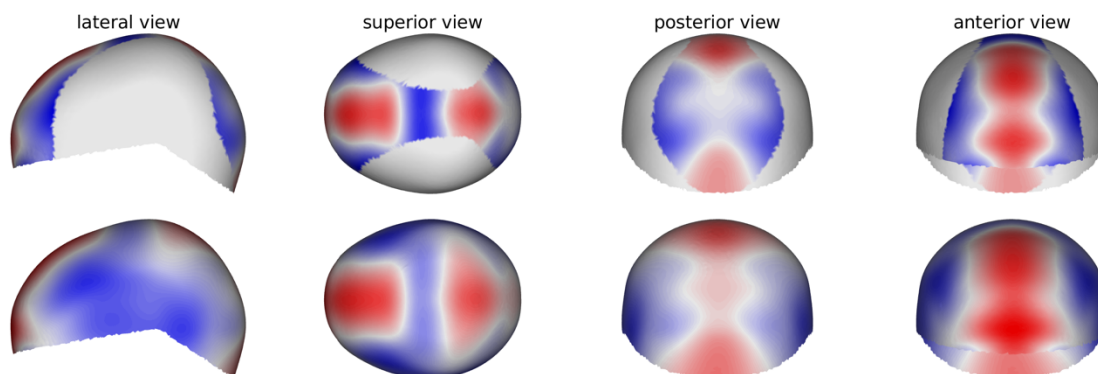

See page 2 for captions

rs1380208

A

CV11

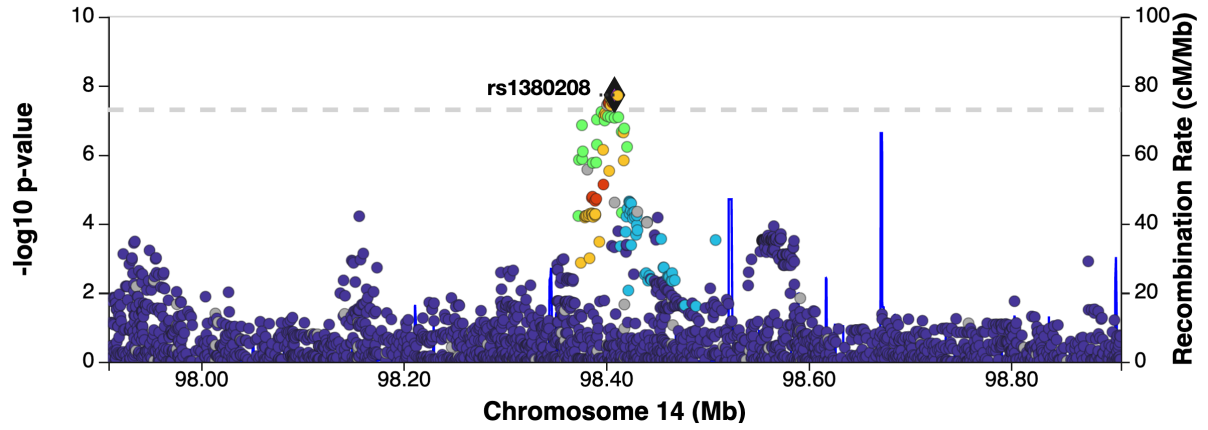

B

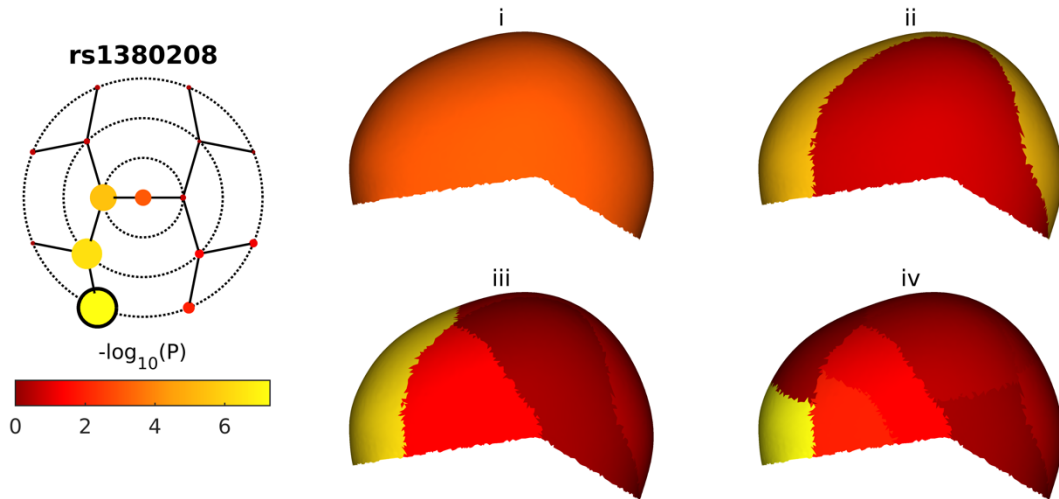

C

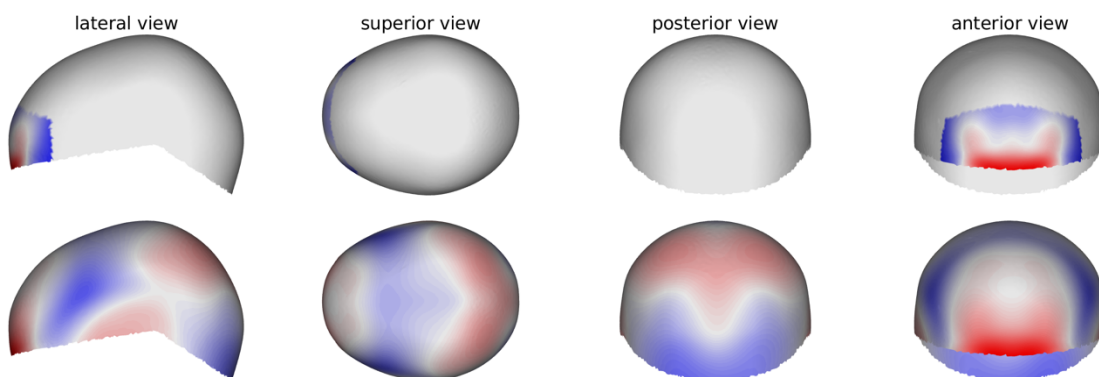

rs4842918

A

CV2

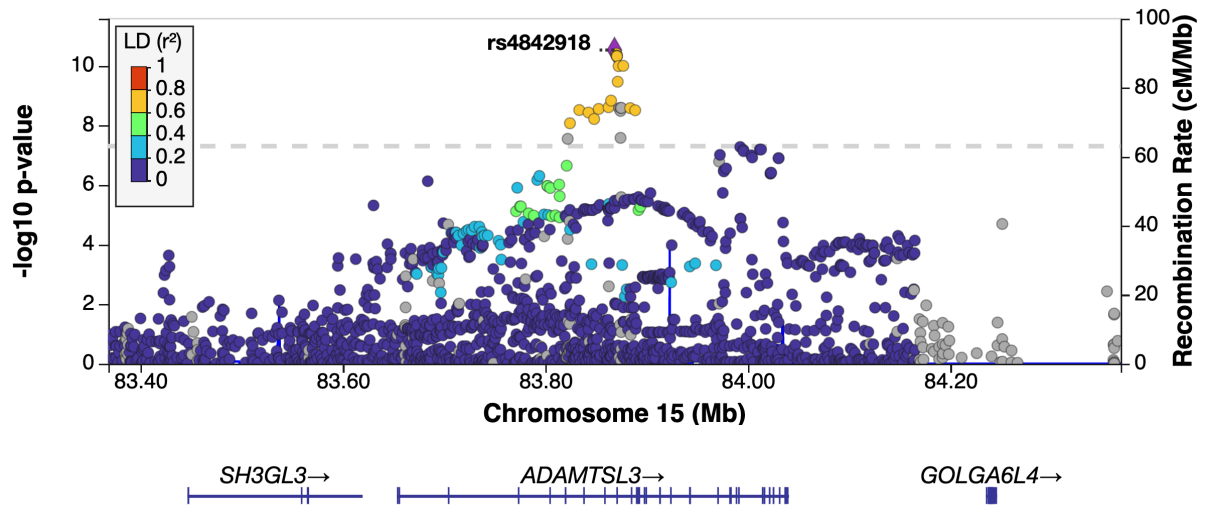

B

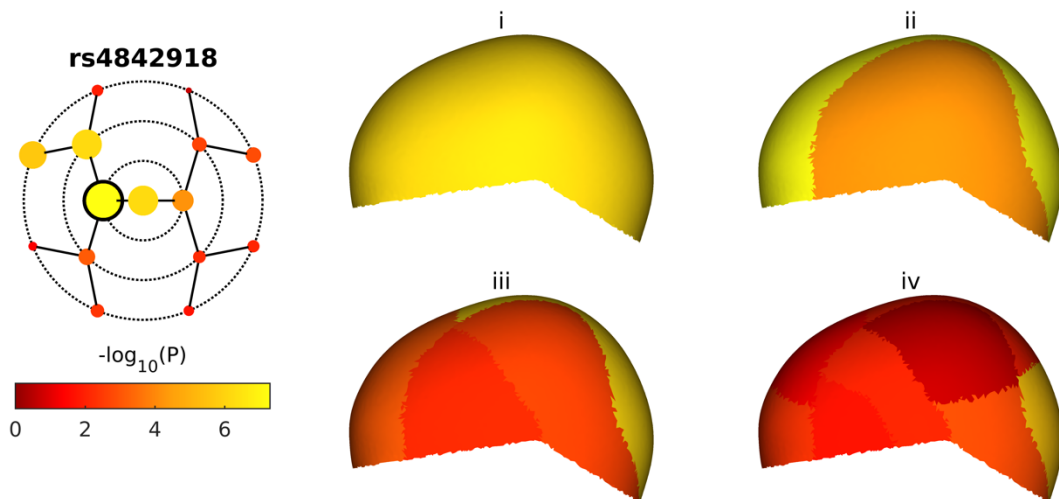

C

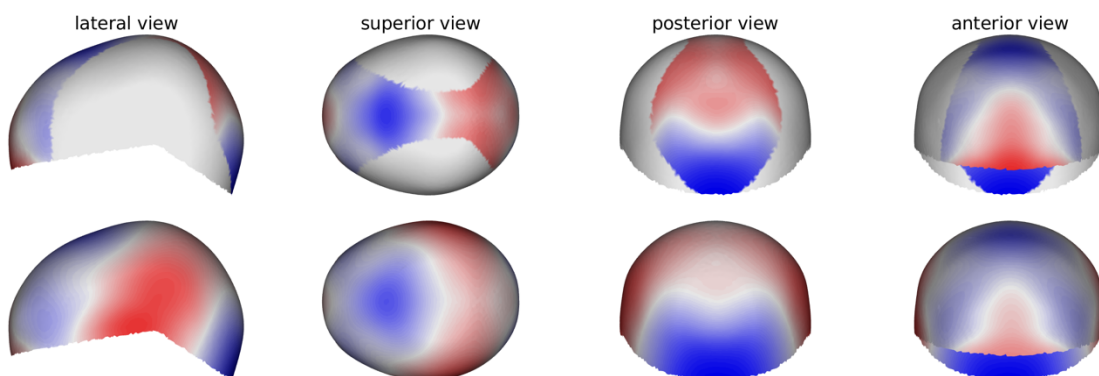

rs12940346

A

CV1

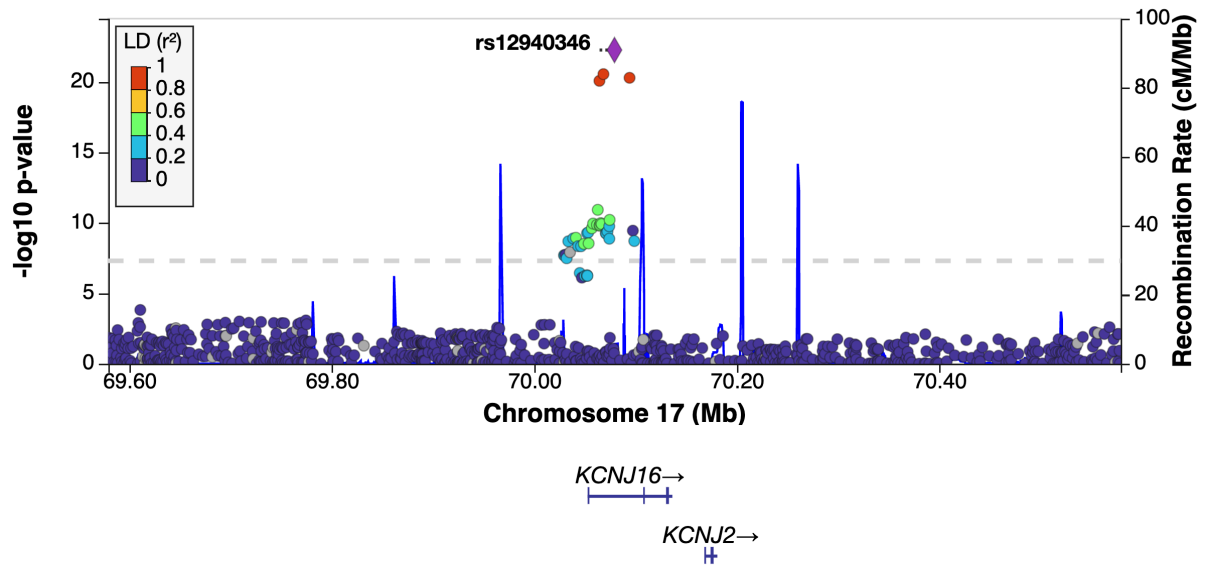

B

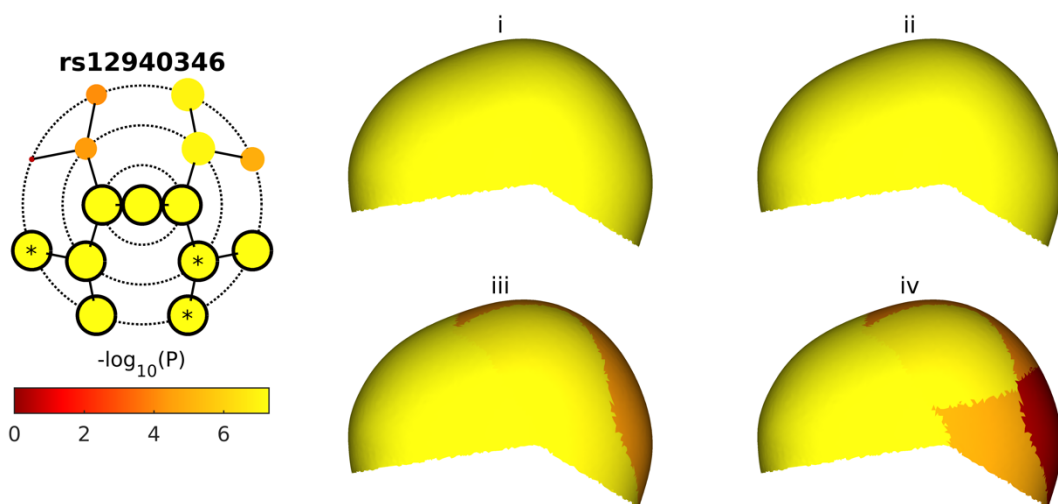

C

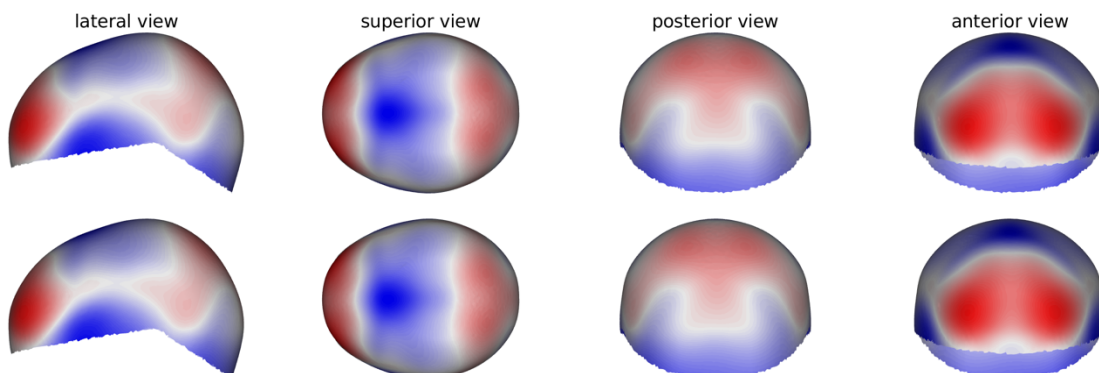

See page 2 for captions

rs1321454

A

CV3

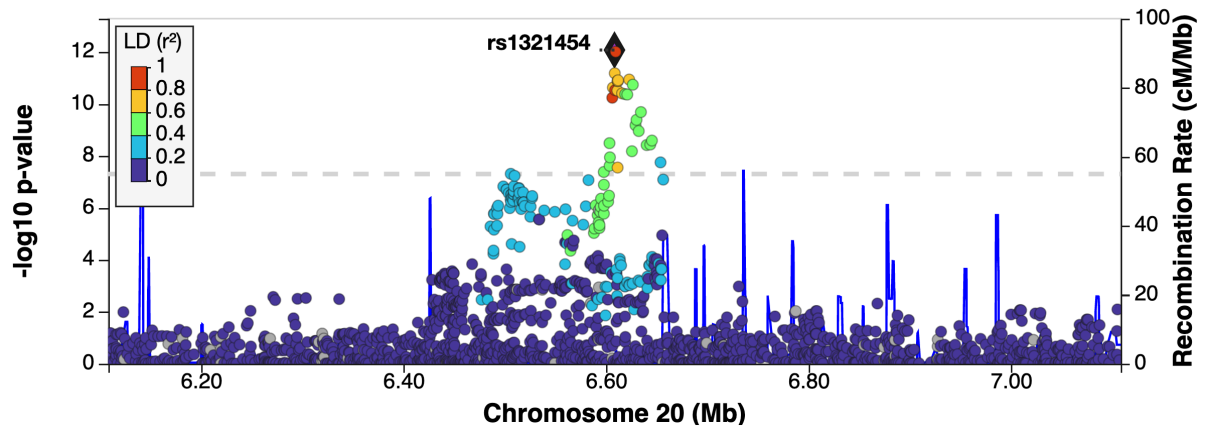

←*FERMT1*

*BMP2*→

B

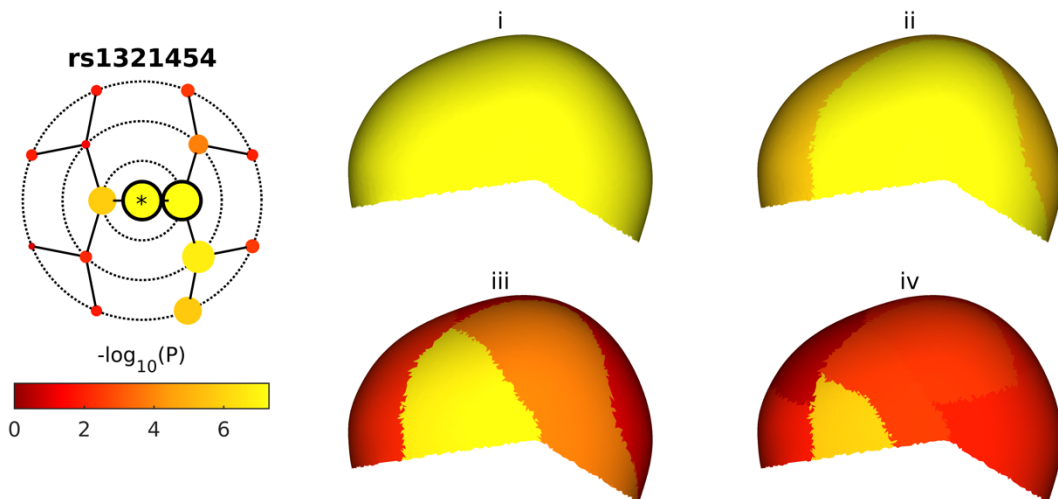

C

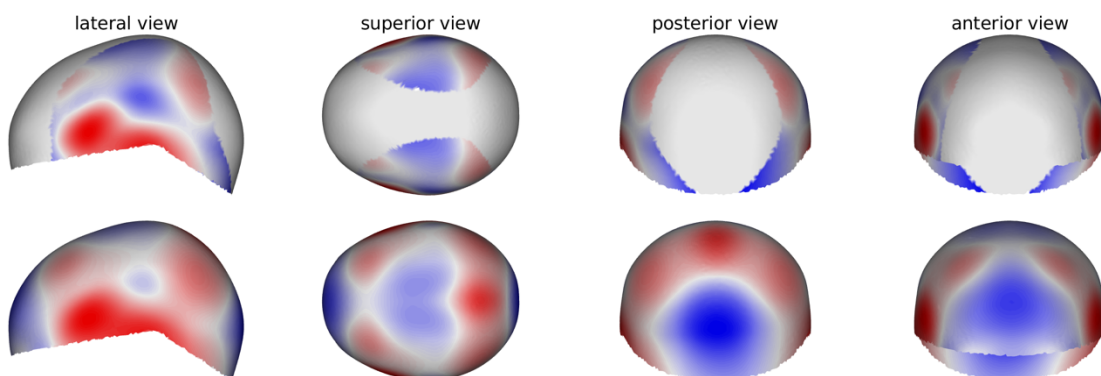

rs6054748

A

CV4

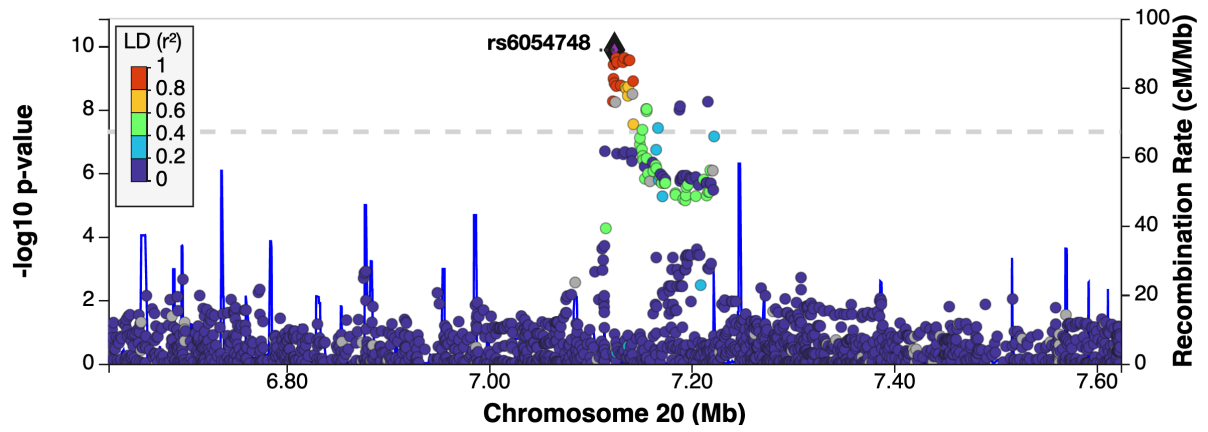

*BMP2*→  
H

B

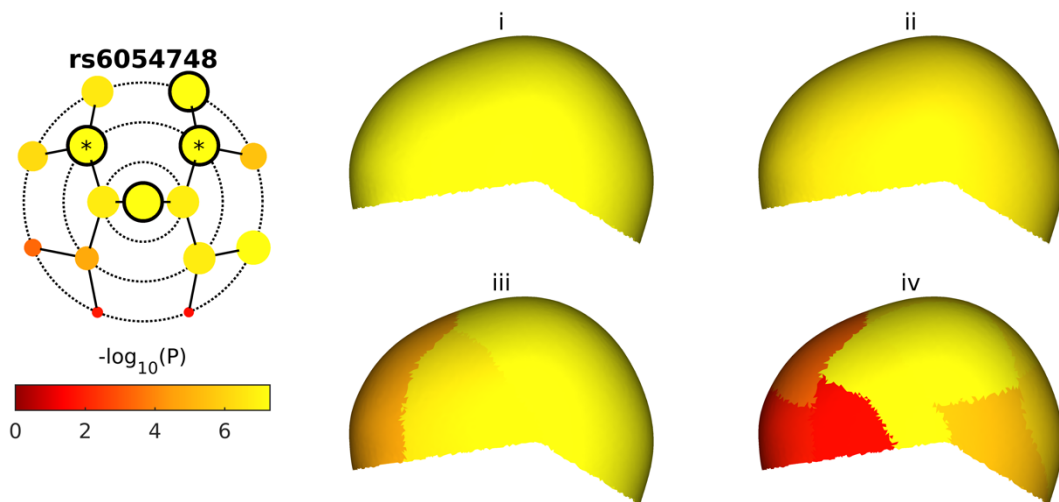

C

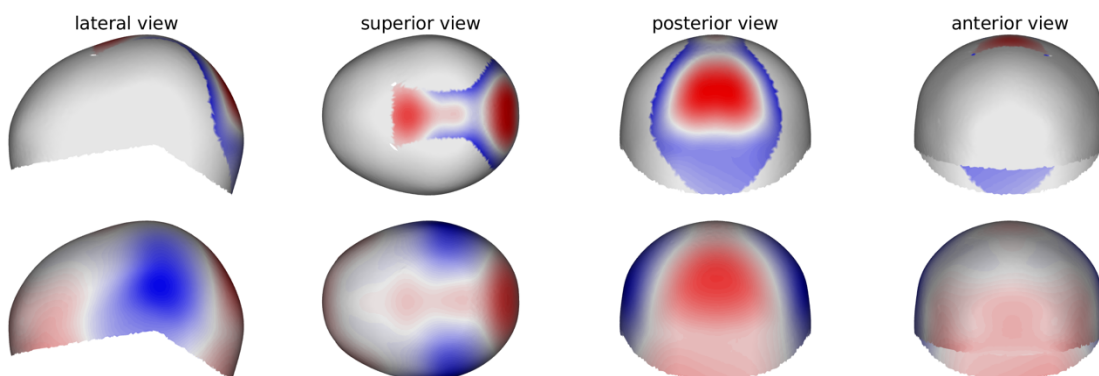

Supplement: 41467_2023_43237_MOESM4_ESM.pdf [file 41467_2023_43237_MOESM4_ESM.pdf]
