# Supplementary material for: Joint multi-ancestry and admixed GWAS reveals the complex genetics behind human cranial vault shape
Source: PubMed Central journal article supplement (PMC10654897; doi:10.1038/s41467-023-43237-8), 2023-11-16
Supplement: 41467_2023_43237_MOESM1_ESM.pdf [file 41467_2023_43237_MOESM1_ESM.pdf]

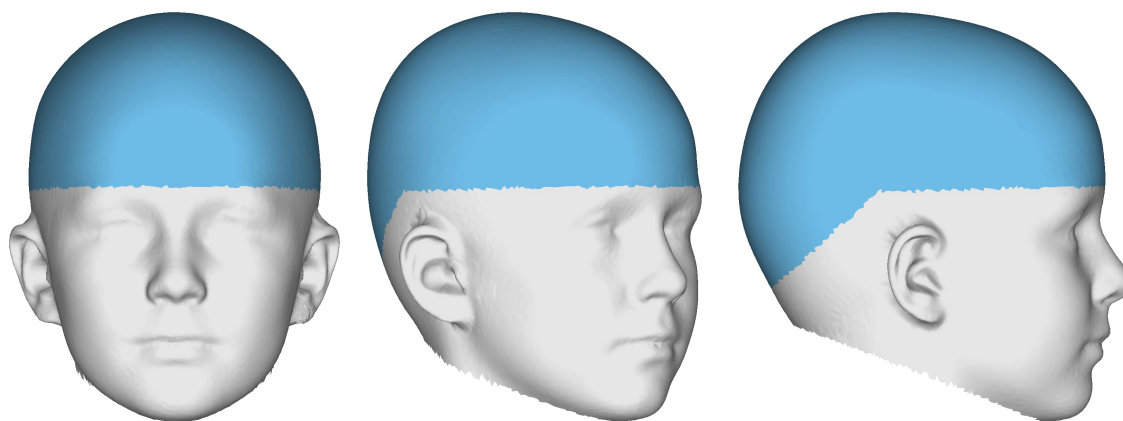

**Supplementary Fig. 1 Cranial vault surface atlas.** The cranial vault surface (cyan) as defined in this study, encompassing the supraorbital ridge and extending towards the occipital bone. Depicted on the full head mesh template.

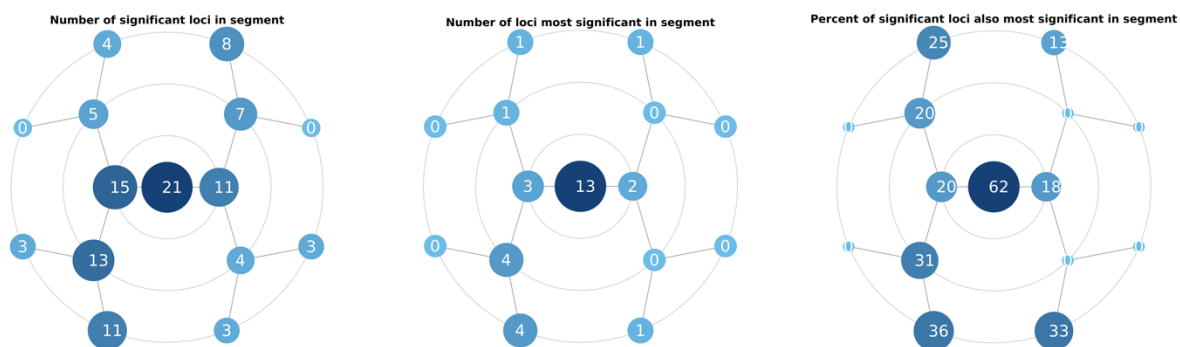

**Supplementary Fig. 2 Localization of genome-wide significant cranial vault shape loci.** Significance is declared at  $P < 5e-8$ . Left to right: the number of significant loci in each cranial vault segment; the number of loci reaching their lowest P value in each segment; the percentage of significant loci also being the most significant in each segment.

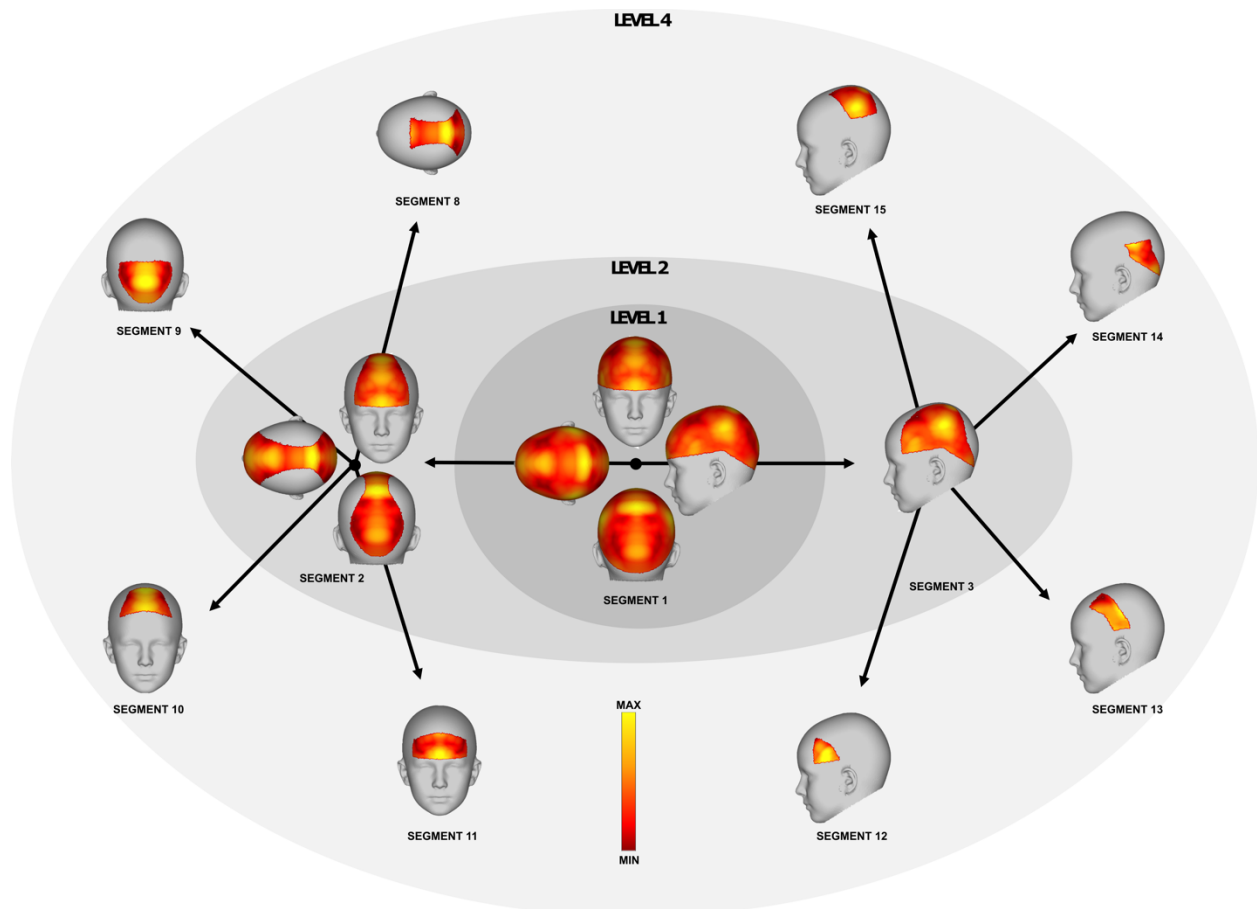

**Supplementary Fig. 3 Deformation hotspots of the cranial vault are separated by global-to-local segmentation.** Vertex-wise normal distances were calculated from the effects of each of 22 SNPs with genome-wide significant ( $P < 5e-8$ ) effects on global cranial vault shape yielding a distribution of normal displacements associated with each vertex. The colormap shows the 95th percentile of this distribution for each vertex. Yellow spots represent deformation hotspots, i.e., regions where shape deformations were observed to be larger than surrounding regions. The global-to-local segmentation was then overlaid to illustrate how it relates to these deformation hotspots. The colormap applies to each segment individually, ranging between the minimum and maximum values. Hierarchical level 3 is omitted to declutter the figure.

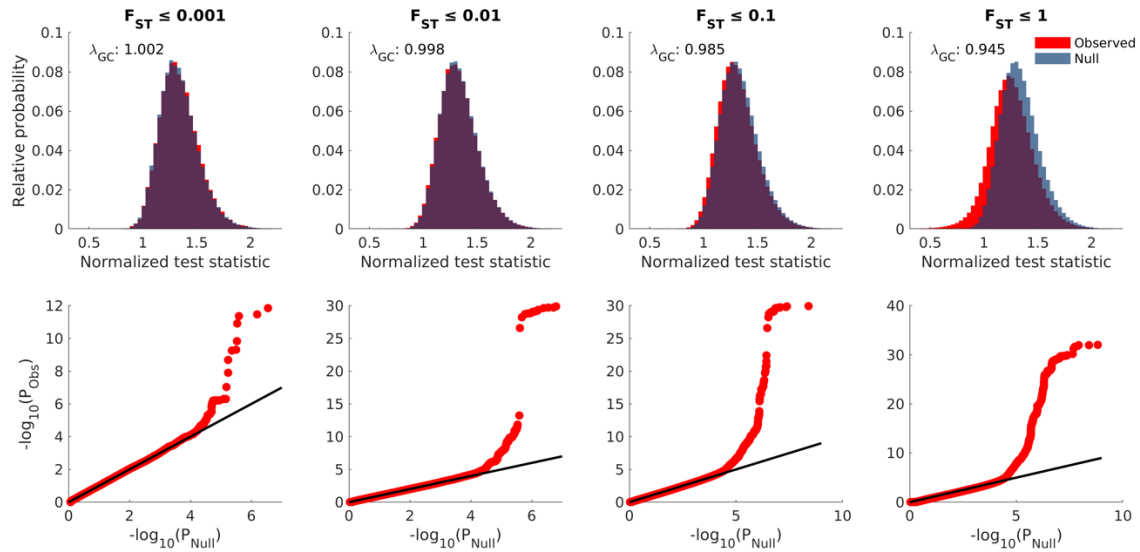

**Supplementary Fig. 4 Observed versus null-distributed genotype-phenotype associations across the  $F_{ST}$  spectrum.** Distributions of observed (red) and null-distributed (blue) normalized test statistics (top row) with corresponding  $\lambda_{GC}$  values and QQ-plots (bottom row) for subsets of SNPs satisfying indicated  $F_{ST}$  thresholds. For each SNP, both the observed and null-distributed P-values together with their test statistics represent the best genotype-phenotype association across the 15 cranial vault segments (Methods). Panels for  $F_{ST} \leq 1$  represent the full GWAS.

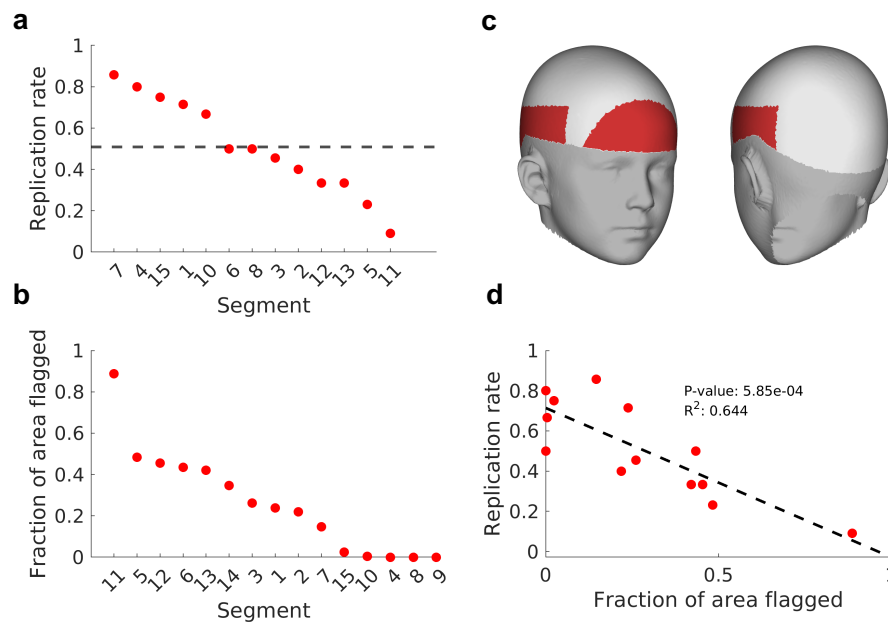

**Supplementary Fig. 5 Segment-wise replication rate in the UK Biobank.** **a**, Fraction of significant ( $P < 5e-8$ ) loci per cranial vault segment that replicated at 5% FDR. Dashed line represents the overall replication rate (55/108 SNP-segment pairs). No significant loci were found to be associated with segments 9 and 14 during discovery. Segments 5 and its direct descendent, segment 11, both contain the forehead, which was severely damaged in the UK Biobank sample. **b**, Fraction of vertices within each cranial vault segment that were flagged, i.e., located within any of the damage-harboring regions. **c**, Damage harboring regions (red) of the cranial vault (light grey). **d**, The fraction of vertices located in damage-harboring regions was significantly associated with the replication rate ( $P\text{-value} = 5.85e-4$ , two-tailed t-test). Each point represents one cranial vault segment.

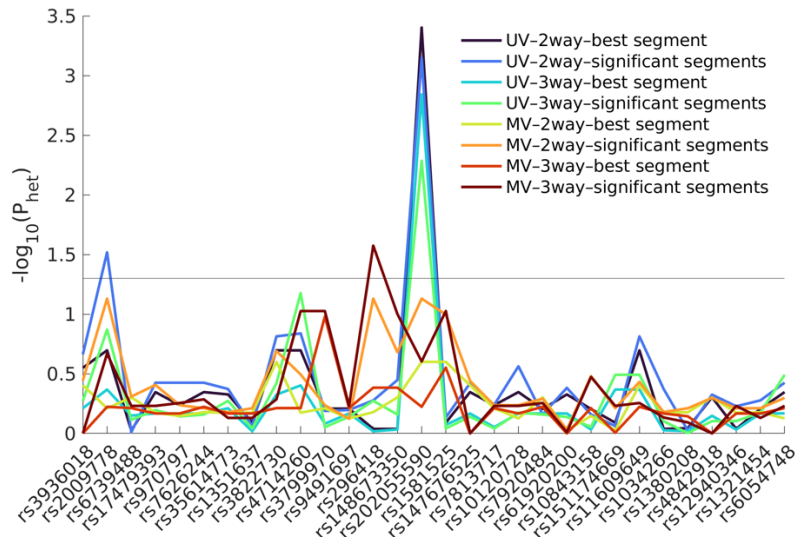

**Supplementary Fig. 6 Effect size heterogeneity of genome-wide cranial vault shape loci.** In total, we used  $2 \times 2 \times 2$  scenarios to test effect size heterogeneity. **UV/MV:** Under the ‘univariate (UV) scenario’, the latent associated shape trait from the main GWAS was tested. Under the ‘multivariate (MV) scenario’, the shape trait was free to vary. **2way/3way:** Under the ‘2-way scenario’, only African-European effect size heterogeneity was tested. Under the ‘3-way scenario’, African-European-Indigenous American effect size heterogeneity was tested. **Best segment/significant segments:** Under the ‘best segment scenario’, heterogeneity of effect size was only tested in the segment most significantly associated with the SNP in the GWAS. Under the ‘significant segments scenario’, heterogeneity of effect size was tested in all segments where that SNP was significant ( $P < 5e-8$ ) in the main GWAS, and the lowest P-value was kept. P-values were adjusted for 5% FDR, and the horizontal line represents the  $P < 0.05$  significance threshold. SNPs are in genomic order.

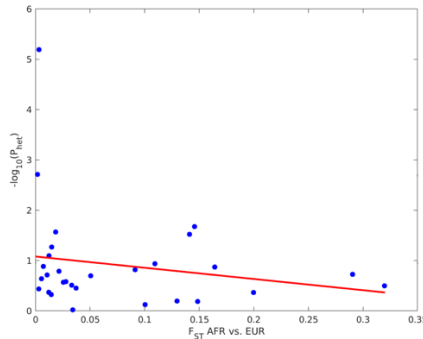

**Supplementary Fig. 7 Relationship between  $F_{ST}$  and effect size heterogeneity.** Heterogeneity of effect size between European and African ancestry based on the univariate latent phenotypes associated with each SNP in the main GWAS. All segment-SNP combinations with  $P < 5e-8$  during GWAS discovery were considered, and the lowest P-value for each SNP was kept after adjustment for 5% FDR. ANOVA F-test was insignificant at 5% alpha (P-value: 0.297,  $R^2$ : 0.039).

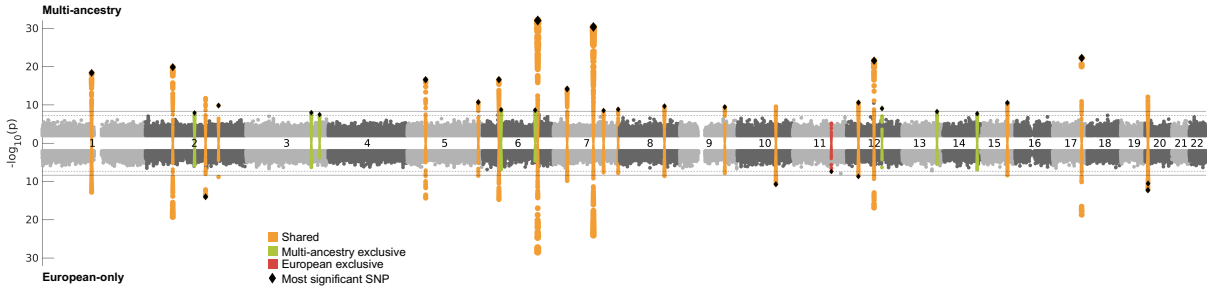

**Supplementary Fig. 8 Genome-wide cranial vault shape loci from multi-ancestry and European-only GWAS.** Miami plot shows the multi-ancestry (top;  $n = 6,772$ ) and European-only GWAS (bottom;  $n = 4,198$ ). Loci are colored based on whether they were shared (orange; lead SNPs within 250 kb); significant only in the multi-ancestry GWAS (green); or significant only in the European-only GWAS (red). Solid black diamonds indicate the most significantly association SNP at each locus and across both GWASs.

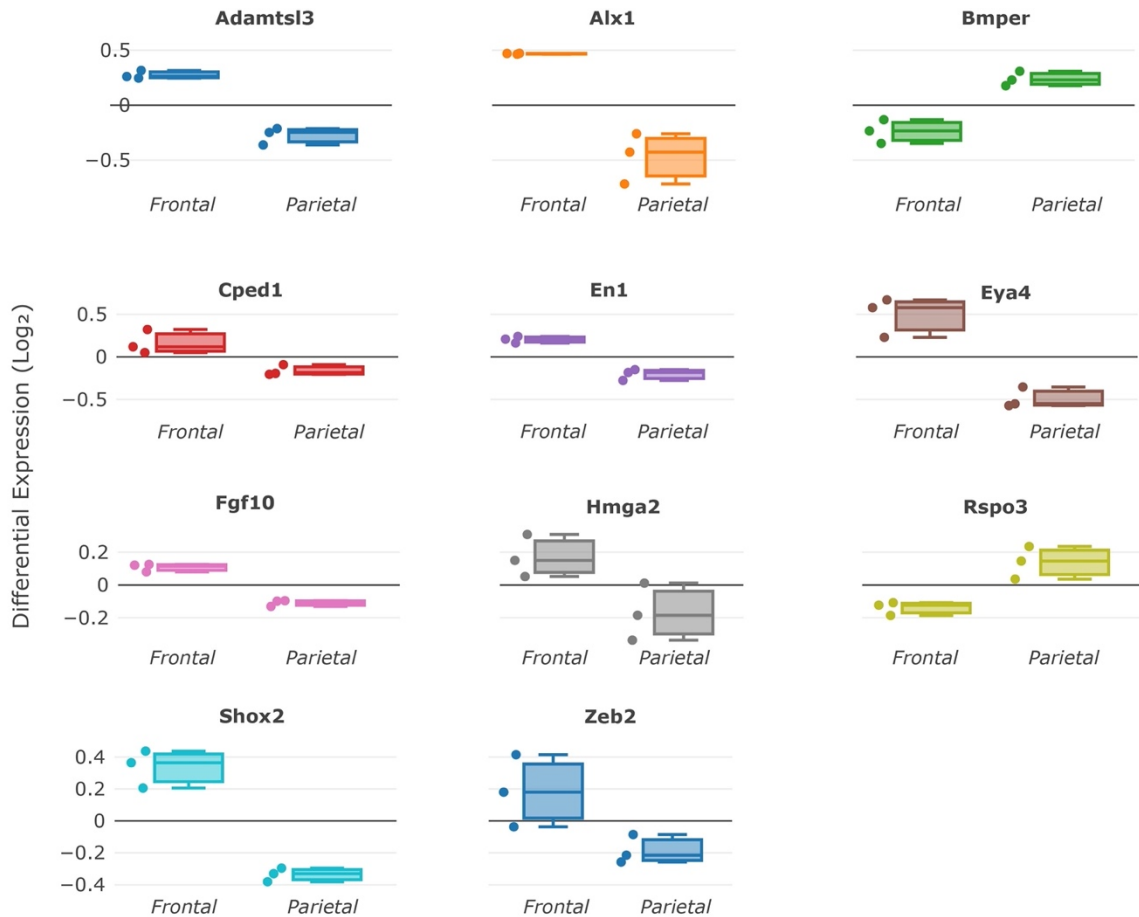

**Supplementary Fig. 9 GWAS Candidate Differentially Expressed Genes (DEGs).** DEGs raw counts were VST transformed, housekeeping gene normalized, and shown as the mean difference of DEG sample groups to the overall mean expression across all (parietal and frontal) sampling groups. Boxplots plot the first and third quartiles, with an internal horizontal line representing the median. Whiskers extend to the largest and smallest values.

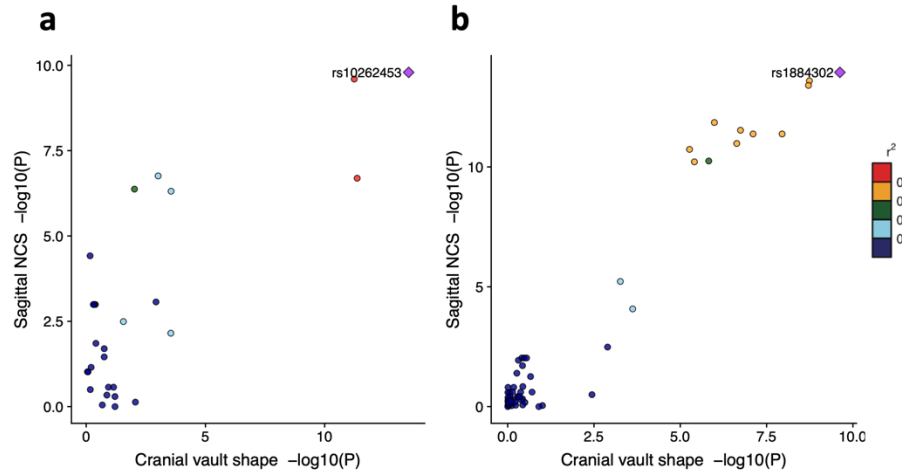

**Supplementary Fig. 10 LocusCompare plots of cranial vault shape and sagittal non-syndromic craniosynostosis for SNPs in common with Justice et al. (2012).** a, LocusCompare plot around rs10262453 near *BBS9*. b, LocusCompare plot around rs1884302 near *BMP2*. Color represents LD ( $r^2$ ) with the lead SNP (purple diamond) from Justice et al. (2012).

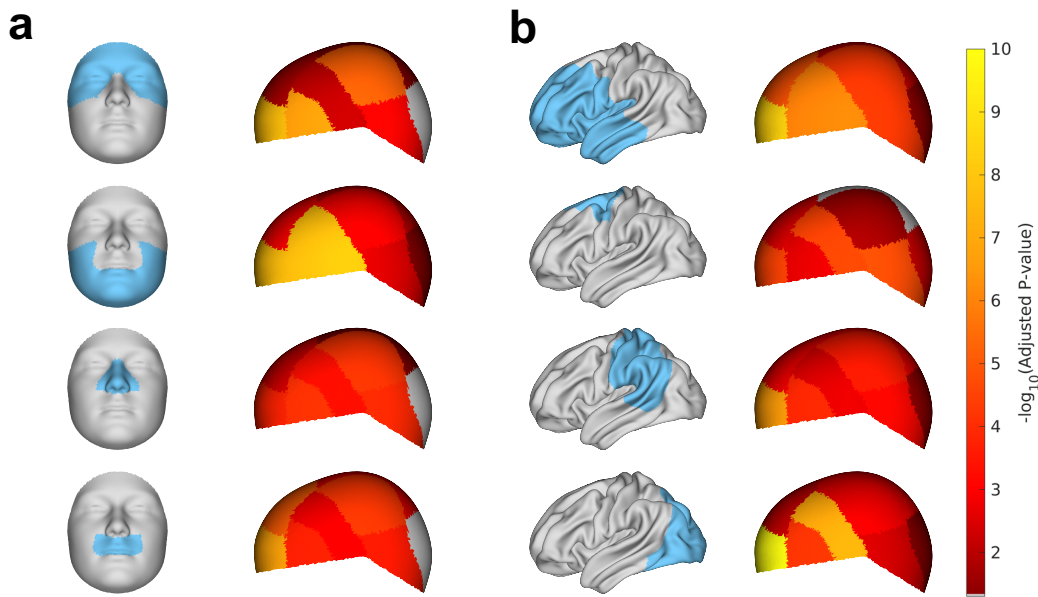

**Supplementary Fig. 11 Genome-wide sharing of signals between the cranial vault, brain, and face.** a, Genetic Spearman correlations with individual level-3 face (a) and brain (b) segments (cyan) across level-4 vault segments. Significance of Spearman correlations was determined based on standard errors obtained through bootstrapping. Empirical P-values (one-tailed) were adjusted for 5% FDR. Insignificant segments are indicated in grey.

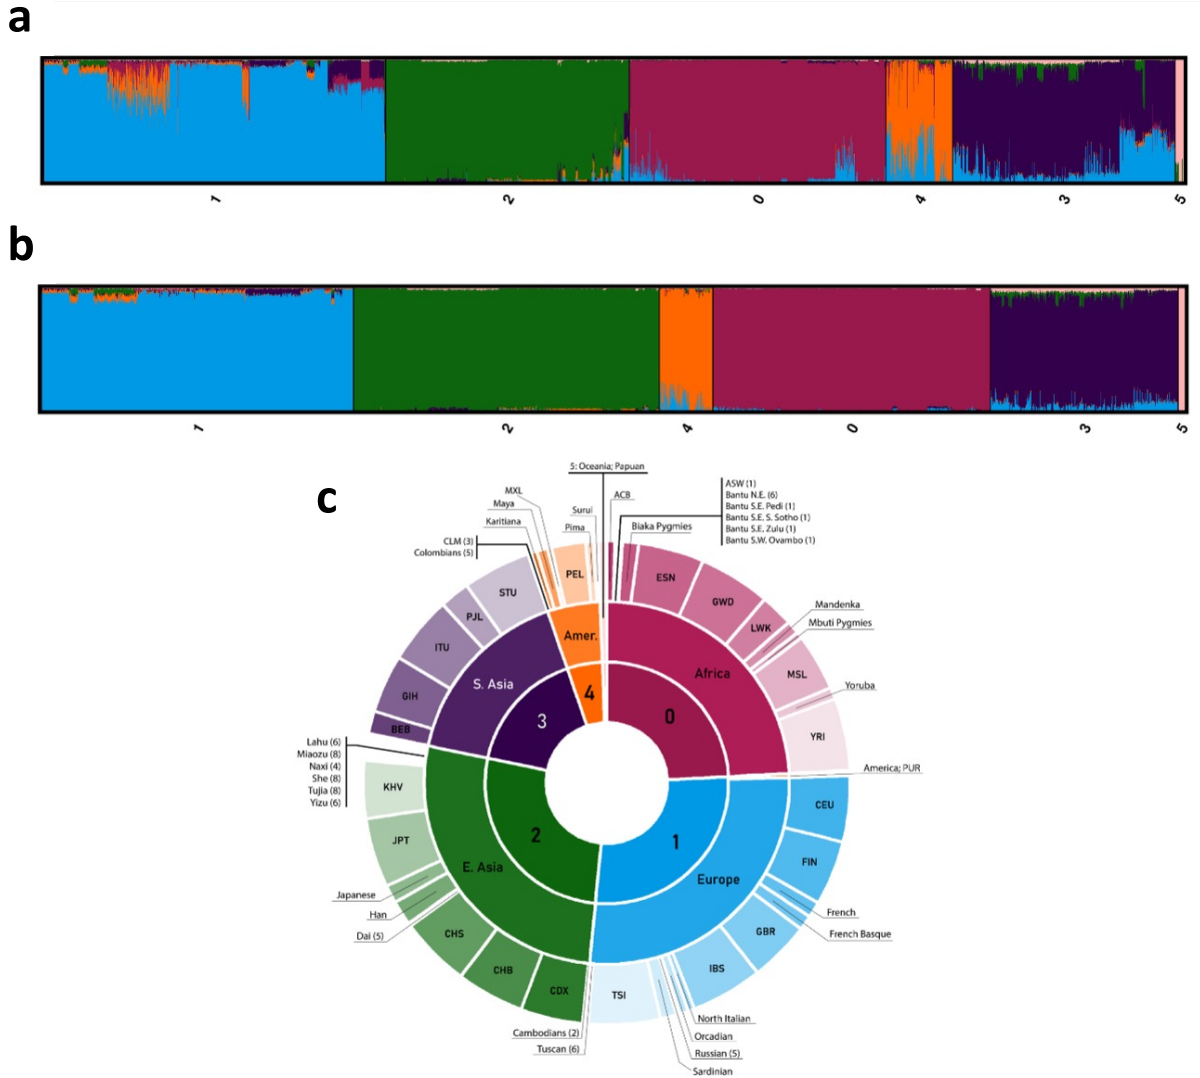

**Supplementary Fig. 12 ADMIXTURE K:6 Model of 1000G and HGDP ancestry references. A,** Clumpak plot of ADMIXTURE Q-file results of K:6 run for HGDP and 1000 genomes reference dataset with unsupervised K-means clustering labels applied. **B,** Clumpak plot of the same ADMIXTURE Q-file results seen in **a**, but for anchor reference data only. **C,** Population labels and the corresponding cluster number in sunburst chart to depict the population and sub-population membership for anchors in each cluster.

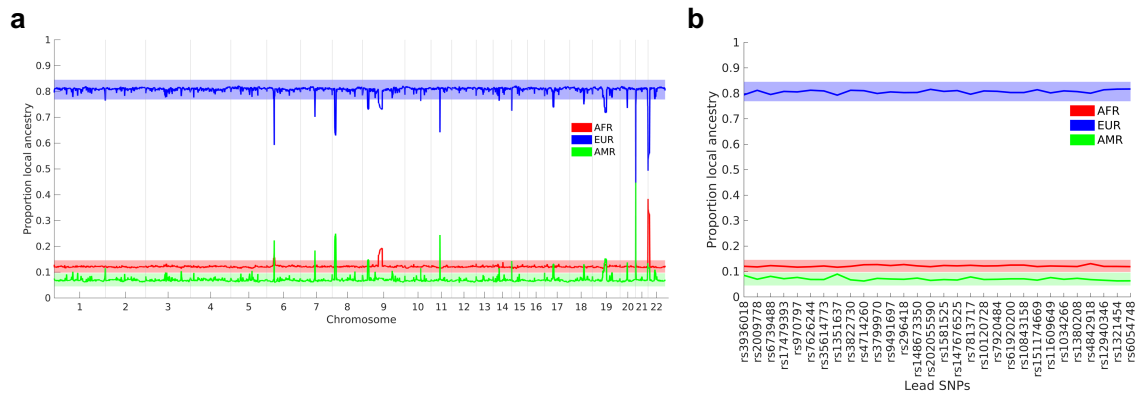

**Supplementary Fig. 13 Genome-wide local ancestry proportions.** **a**, Genome-wide fractions of local African (AFR; red), European (EUR; blue), and Indigenous American (AMR; green) ancestry inferred by RFMIX v2. **b**, local ancestry proportions at the 30 genome-wide significant lead SNPs. Bands indicate 95% confidence interval on the genome-wide local ancestry proportions.

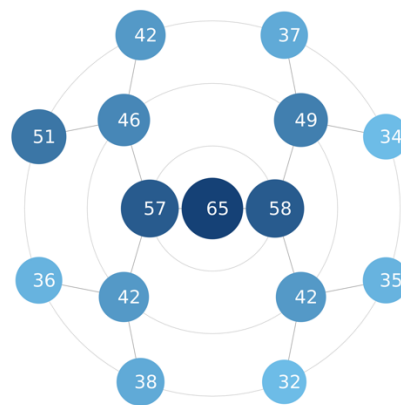

**Supplementary Fig. 14 Number of phenotypic dimensions per cranial vault segment.** The rosette indicates the number of PCs used to describe the major phenotypic variance in each cranial vault segment as determined by parallel analysis (Methods).

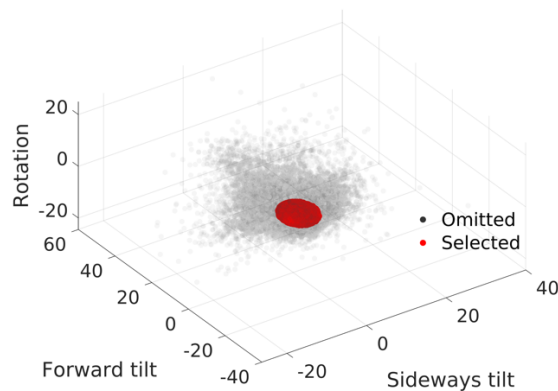

**Supplementary Fig. 15 Distribution of rotations along all three dimensions.** Grey dots represent omitted images while red dots, situated in the centroid, represent selected images with an aggregated score > 0.8.



**Supplementary Table 1, Lead SNPs at 30 genome-wide significant GWAS loci.**

P-values were obtained with CCA (upper-tail chi squared).

Support represents the number of 'suggestive' SNPs with P-value < 1e-6 that are clumped with the lead SNP.

Position is in GRCh38 coordinates.

Annotated protein coding genes include their source between brackets: Closest gene TSS (C); GREAT with default settings (GREAT); FUMA with default settings (FUMA);

eQTL co-localization based on GTEx8 and Bayesian colocalization with 'coloc' package and threshold of PP4 ≥ 0.7 (GTEX); and literature and within 500 kb (LIT).

| rsID        | Chromosome | Position  | A1 | A2 | MAF   | Support | Vault Segment | -log10(P discovery) | -log10(P replication) | Replication Significant | Annotated genes                                                                    |
|-------------|------------|-----------|----|----|-------|---------|---------------|---------------------|-----------------------|-------------------------|------------------------------------------------------------------------------------|
| rs3936018   | 1          | 119139747 | T  | C  | 0.214 | 236 11  |               | 18.39               | 0.12                  | FALSE                   | WARS2 (C,GREAT,FUMA,GTEX), TBX15 (FUMA,LIT), HSD3B2 (GTEX), HAO2 (GTEX)            |
| rs2009778   | 2          | 65750729  | C  | T  | 0.339 | 69 1    |               | 19.87               | 12.74                 | TRUE                    | MEIS1 (GREAT,LIT), SPRED2 (C,GREAT)                                                |
| rs6739488   | 2          | 118432725 | G  | A  | 0.472 | 34 1    |               | 7.92                | 2.65                  | TRUE                    | INSIG2 (C,GREAT), EN1 (GREAT,LIT)                                                  |
| rs17479393  | 2          | 144895720 | A  | T  | 0.210 | 41 1    |               | 11.73               | 17.96                 | TRUE                    | ZEB2 (C,GREAT,LIT)                                                                 |
| rs970797    | 2          | 176247091 | T  | G  | 0.426 | 3 5     |               | 9.85                | 3.21                  | TRUE                    | MTX2 (C,GREAT), HOXD1 (GREAT), HOXD cluster (LIT)                                  |
| rs7626244   | 3          | 157756785 | C  | A  | 0.398 | 38 5    |               | 7.99                | 0.35                  | FALSE                   | VEPH1 (C,GREAT), SHOX2 (GREAT,LIT)                                                 |
| rs35614773  | 3          | 177593205 | T  | G  | 0.431 | 83 1    |               | 7.46                | 0.68                  | FALSE                   | KCNMB2 (GREAT), TBL1XR1 (C,GREAT,GTEX,LIT)                                         |
| rs1351637   | 5          | 44441601  | A  | G  | 0.186 | 21 8    |               | 16.60               | 3.96                  | TRUE                    | MRPS30 (GREAT), FGF10 (C,GREAT,FUMA,LIT)                                           |
| rs3822730   | 5          | 171747250 | G  | C  | 0.465 | 12 2    |               | 10.73               | 19.95                 | TRUE                    | SMIM23 (C,GREAT), FGF18 (GREAT,GTEX,LIT)                                           |
| rs4714260   | 6          | 39568846  | T  | C  | 0.442 | 117 1   |               | 16.62               | 2.68                  | TRUE                    | KCNK16 (GREAT), KIF6 (C,GREAT,FUMA,GTEX,LIT), DAAM2 (GTEX,LIT)                     |
| rs3799970   | 6          | 44842621  | T  | A  | 0.198 | 41 1    |               | 8.72                | 2.83                  | TRUE                    | RUNX2 (GREAT,FUMA,LIT), CDC5L (C,GREAT), SUPT3H (FUMA)                             |
| rs9491697   | 6          | 127134977 | A  | G  | 0.418 | 12 3    |               | 8.64                | 0.11                  | FALSE                   | RNF146 (GREAT), RSPO3 (C,GREAT,FUMA,GTEX,LIT)                                      |
| rs296418    | 6          | 133334925 | A  | G  | 0.325 | 137 11  |               | 32.04               | 6.13                  | TRUE                    | TCF21 (GREAT), EYA4 (C,GREAT,FUMA,GTEX,LIT)                                        |
| rs148673350 | 7          | 33219926  | C  | T  | 0.294 | 47 1    |               | 14.16               | 31.99                 | TRUE                    | BMPER (GREAT,GTEX), BBS9 (C,GREAT,GTEX,LIT), RP9 (FUMA)                            |
| rs202055590 | 7          | 96585031  | A  | G  | 0.348 | 212 1   |               | 30.39               | 2.72                  | TRUE                    | DLX6 (GREAT), SLC25A13 (C,GREAT), SEM1 (FUMA), DLX5 (LIT)                          |
| rs1581525   | 7          | 121228465 | A  | G  | 0.394 | 68 12   |               | 8.52                | 0.52                  | FALSE                   | WNT16 (C,GREAT,GTEX,LIT), CPED1 (GREAT,FUMA)                                       |
| rs147676525 | 7          | 156385384 | A  | G  | 0.019 | 25 15   |               | 8.84                | 6.04                  | TRUE                    | SHH (GREAT,LIT), RNF32 (C,GREAT)                                                   |
| rs7813717   | 8          | 108534556 | G  | A  | 0.466 | 229 1   |               | 9.65                | 2.31                  | TRUE                    | EMC2 (C,GREAT,FUMA,GTEX), TMEM74 (GREAT), EIF3E (FUMA), NUDCD1 (GTEX), RSPO2 (LIT) |
| rs10120728  | 9          | 108615575 | C  | T  | 0.258 | 13 5    |               | 9.46                | 0.51                  | FALSE                   | ACTL7B (C,GREAT), ELP1 (LIT)                                                       |
| rs7920484   | 10         | 93190051  | A  | C  | 0.392 | 54 1    |               | 9.57                | 1.20                  | FALSE                   | CYP26A1 (C,GREAT), MYOF (GREAT), CEP55 (LIT)                                       |
| rs61920200  | 12         | 28085972  | G  | A  | 0.247 | 2 1     |               | 7.64                | 1.26                  | FALSE                   | PTHLH (GREAT,LIT), CCDC91 (C,GREAT,FUMA)                                           |
| rs10843158  | 12         | 28354259  | C  | T  | 0.228 | 563 1   |               | 10.62               | 11.59                 | TRUE                    | FAR2 (GREAT), CCDC91 (C,GREAT), PTHLH (LIT)                                        |
| rs151174669 | 12         | 65980466  | C  | T  | 0.177 | 46 11   |               | 21.57               | 3.82                  | TRUE                    | LLPH (C,GREAT), HMGA2 (GREAT,FUMA,LIT)                                             |
| rs11609649  | 12         | 85182714  | G  | A  | 0.139 | 6 5     |               | 9.08                | 4.78                  | TRUE                    | TSPAN19 (GREAT), ALX1 (C,GREAT,FUMA,LIT), LRRIQ1 (FUMA)                            |
| rs1034266   | 13         | 100322513 | G  | C  | 0.380 | 6 2     |               | 8.26                | 4.55                  | TRUE                    | PCCA (C,GREAT,FUMA), GGACT (GREAT), ZIC2 (GTEX,LIT)                                |
| rs1380208   | 14         | 98408346  | A  | C  | 0.328 | 32 11   |               | 7.73                | 0.79                  | FALSE                   | BCL11B (C,GREAT)                                                                   |
| rs4842918   | 15         | 83868247  | T  | C  | 0.250 | 43 2    |               | 10.53               | 0.44                  | FALSE                   | GOLGA6L4 (GREAT,GTEX), ADAMTSL3 (C,GREAT,FUMA,LIT), WHAMM (GTEX)                   |
| rs12940346  | 17         | 70079183  | T  | C  | 0.294 | 38 1    |               | 22.26               | 6.34                  | TRUE                    | KCNJ16 (C,GREAT,FUMA,GTEX), MAP2K6 (GREAT), KCNJ2 (LIT)                            |
| rs1321454   | 20         | 6608452   | T  | C  | 0.390 | 149 3   |               | 12.07               | 1.88                  | TRUE                    | FERMT1 (GREAT), BMP2 (C,GREAT,LIT)                                                 |
| rs6054748   | 20         | 7123941   | G  | A  | 0.383 | 27 4    |               | 9.88                | 2.07                  | TRUE                    | BMP2 (C,GREAT,LIT), HAO1 (GREAT)                                                   |



**Supplementary Table 3, GREAT functional enrichment of genome-wide loci for GO biological processes**

Terms were considered significant if both binomial P-values (one-tailed) and hypergeometric P-values (one-tailed) were significant at 5% FDR (BinomFdrQ, and HyperFdrQ). Only the top 100 terms are shown.

| ID         | Description                                              | BinomP      | BinomFdrQ   | HyperP       | HyperFdrQ   | ObsGenes | TotalGenes | Genes                                                                              |
|------------|----------------------------------------------------------|-------------|-------------|--------------|-------------|----------|------------|------------------------------------------------------------------------------------|
| GO:0001501 | skeletal system development                              | 9.799348e-9 | 1.265782e-4 | 4.651235e-10 | 6.008000e-6 | 13       | 463        | ALX1,BMP2,DLX6,EN1,FGF18,HMGA2,HOXD1,INSIG2,MEIS1,PTHLH,RUNX2,SHH,SHOX2            |
| GO:0048762 | mesenchymal cell differentiation                         | 3.330145e-8 | 2.150774e-4 | 3.383185e-9  | 2.185030e-5 | 8        | 130        | ALX1,BMP2,FGF10,HMGA2,SHH,TCF21,WNT16,ZEB2                                         |
| GO:0009790 | embryo development                                       | 2.502524e-7 | 1.077503e-3 | 2.322772e-8  | 7.500811e-5 | 15       | 905        | ALX1,BMP2,DLX6,EN1,FGF10,HMGA2,HOXD1,INSIG2,RSPO3,RUNX2,SHH,SHOX2,TCF21,WNT16,ZEB2 |
| GO:0004805 | mesenchyme development                                   | 4.088109e-7 | 1.320153e-3 | 6.362272e-8  | 1.369681e-4 | 8        | 189        | ALX1,BMP2,FGF10,HMGA2,SHH,TCF21,WNT16,ZEB2                                         |
| GO:0048598 | embryonic morphogenesis                                  | 9.313046e-7 | 2.405932e-3 | 3.743503e-9  | 1.611828e-5 | 13       | 550        | ALX1,DLX6,EN1,FGF10,HMGA2,INSIG2,RSPO3,RUNX2,SHH,SHOX2,TCF21,WNT16,ZEB2            |
| GO:0042475 | odontogenesis of dentin-containing tooth                 | 1.202830e-6 | 2.589493e-3 | 2.575072e-6  | 1.750642e-3 | 5        | 76         | BCL11B,BMP2,FGF10,RUNX2,SHH                                                        |
| GO:0061448 | connective tissue development                            | 1.868446e-6 | 3.449662e-3 | 1.418901e-6  | 1.221518e-3 | 7        | 196        | ALX1,BMP2,FGF18,HMGA2,RUNX2,SHOX2,TBLX1                                            |
| GO:0048562 | embryonic organ morphogenesis                            | 1.961521e-6 | 3.167121e-3 | 9.772344e-8  | 1.803312e-4 | 9        | 281        | ALX1,DLX6,FGF10,INSIG2,RUNX2,SHH,SHOX2,TCF21,WNT16                                 |
| GO:0010305 | regulation of cartilage development                      | 2.061750e-6 | 2.959069e-3 | 9.298337e-7  | 9.238971e-4 | 5        | 62         | BMP2,FGF18,PTHLH,RUNX2,SHOX2                                                       |
| GO:0002062 | chondrocyte differentiation                              | 2.091540e-6 | 2.701642e-3 | 9.298337e-7  | 9.238971e-4 | 5        | 62         | BMP2,FGF18,HMGA2,RUNX2,SHOX2                                                       |
| GO:0009887 | animal organ morphogenesis                               | 2.626751e-6 | 3.084522e-3 | 6.178819e-7  | 7.232249e-4 | 13       | 858        | ALX1,BCL11B,BMP2,DLX6,FGF10,FGF18,INSIG2,MEIS1,RUNX2,SHH,SHOX2,TCF21,WNT16         |
| GO:0048646 | anatomical structure formation involved in morphogenesis | 3.602997e-6 | 3.878326e-3 | 4.076686e-7  | 5.265855e-4 | 13       | 821        | ALX1,BMPER,DLX6,FGF10,FGF18,HMGA2,MEIS1,MYOF,RSPO3,SHH,TCF21,WNT16,ZEB2            |
| GO:0048568 | embryonic organ development                              | 3.769832e-6 | 3.745763e-3 | 2.363122e-8  | 6.104889e-5 | 11       | 418        | ALX1,DLX6,EN1,FGF10,INSIG2,RSPO3,RUNX2,SHH,SHOX2,TCF21,WNT16                       |
| GO:0051216 | cartilage development                                    | 4.400594e-6 | 4.060177e-3 | 4.426127e-6  | 2.485751e-3 | 6        | 150        | ALX1,BMP2,FGF18,HMGA2,RUNX2,SHOX2                                                  |
| GO:0048729 | tissue morphogenesis                                     | 4.497534e-6 | 3.872976e-3 | 1.637107e-6  | 1.321657e-3 | 10       | 510        | ALX1,BMP2,FGF10,HMGA2,RSPO3,SHH,SHOX2,TCF21,WNT16,ZEB2                             |
| GO:0001649 | osteoblast differentiation                               | 5.027256e-6 | 4.058567e-3 | 2.512608e-5  | 7.727466e-3 | 5        | 121        | BMP2,PTHLH,RUNX2,SHH,SHOX2                                                         |
| GO:0060348 | bone development                                         | 6.398060e-6 | 4.861397e-3 | 7.928049e-6  | 3.531262e-3 | 6        | 166        | BMP2,FGF18,INSIG2,MEIS1,RUNX2,SHOX2                                                |
| GO:0042481 | odontogenesis                                            | 8.029757e-6 | 5.762243e-3 | 1.449267e-5  | 5.200051e-3 | 5        | 108        | BCL11B,BMP2,FGF10,RUNX2,SHH                                                        |
| GO:0042815 | regulation of odontogenesis                              | 9.759835e-6 | 6.635147e-3 | 5.578101e-5  | 1.334302e-2 | 3        | 26         | BMP2,RUNX2,SHH                                                                     |
| GO:0035295 | tube development                                         | 1.098422e-5 | 7.094158e-3 | 3.012946e-6  | 1.853249e-3 | 10       | 546        | ALX1,BMP2,BMPER,EN1,FGF10,FGF18,SHH,SHOX2,TCF21,ZEB2                               |
| GO:0001823 | mesonephros development                                  | 1.312862e-5 | 8.075352e-3 | 5.942086e-6  | 2.842738e-3 | 5        | 90         | BMP2,BMPER,FGF10,SHH,TCF21                                                         |
| GO:0048557 | embryonic digestive tract morphogenesis                  | 1.479889e-5 | 6.688951e-3 | 2.292820e-7  | 3.280706e-4 | 4        | 19         | FGF10,SHH,SHOX2,TCF21                                                              |
| GO:0030177 | positive regulation of Wnt signaling pathway             | 1.570510e-5 | 8.820121e-3 | 5.549050e-6  | 2.756811e-3 | 6        | 156        | BMP2,FGF10,RNF146,RSPO3,SHH,ZEB2                                                   |
| GO:0035108 | limb morphogenesis                                       | 1.681807e-5 | 9.051625e-3 | 2.02810e-7   | 3.282226e-4 | 7        | 147        | ALX1,DLX6,EN1,FGF10,RUNX2,SHH,SHOX2                                                |
| GO:0040009 | chordate embryonic development                           | 2.098877e-5 | 1.084448e-2 | 2.612355e-5  | 7.524457e-3 | 9        | 555        | ALX1,BMP2,EN1,HOXD1,RSPO3,RUNX2,SHH,SHOX2,ZEB2                                     |
| GO:0009792 | embryo development ending in birth or egg hatching       | 2.203482e-5 | 1.094707e-2 | 2.812437e-5  | 7.897445e-3 | 9        | 560        | ALX1,BMP2,EN1,HOXD1,RSPO3,RUNX2,SHH,SHOX2,ZEB2                                     |
| GO:0048839 | inner ear development                                    | 2.412045e-5 | 1.153940e-2 | 1.219446e-5  | 4.773207e-3 | 6        | 179        | BMP2,BMPER,DLX6,FGF10,INSIG2,SHH                                                   |
| GO:0060173 | limb development                                         | 2.675300e-5 | 1.234173e-2 | 5.901900e-7  | 6.930440e-4 | 7        | 172        | ALX1,DLX6,EN1,FGF10,RUNX2,SHH,SHOX2                                                |
| GO:0001503 | ossification                                             | 2.954978e-5 | 1.316188e-2 | 7.762052e-5  | 1.591467e-2 | 6        | 249        | BMP2,FGF18,PTHLH,RUNX2,SHH,SHOX2                                                   |
| GO:0035115 | embryonic forelimb morphogenesis                         | 3.062717e-5 | 1.318704e-2 | 2.069069e-6  | 1.484787e-3 | 4        | 32         | EN1,RUNX2,SHH,SHOX2                                                                |
| GO:0043616 | keratinocyte proliferation                               | 3.163076e-5 | 1.317982e-2 | 4.856438e-6  | 2.613775e-3 | 3        | 12         | FERMT1,FGF10,WNT16                                                                 |
| GO:0072359 | circulatory system development                           | 3.299543e-5 | 1.331881e-2 | 1.275254e-5  | 4.844840e-3 | 11       | 792        | BMP2,BMPER,FGF10,FGF18,MEIS1,RSPO3,SHH,SHOX2,TCF21,WARS2,WNT16                     |
| GO:0007423 | sensory organ development                                | 3.358539e-5 | 1.314614e-2 | 1.407723e-5  | 5.195302e-3 | 9        | 513        | BCL11B,BMP2,BMPER,DLX6,FGF10,INSIG2,MEIS1,SHH,WNT16                                |
| GO:0002009 | morphogenesis of an epithelium                           | 3.773384e-5 | 1.433553e-2 | 1.943343e-5  | 6.436452e-3 | 8        | 406        | ALX1,BMP2,FGF10,RSPO3,SHH,TCF21,WNT16,ZEB2                                         |
| GO:0030326 | embryonic limb morphogenesis                             | 4.278237e-5 | 1.578914e-2 | 1.683187e-6  | 1.278925e-3 | 6        | 127        | ALX1,DLX6,EN1,RUNX2,SHH,SHOX2                                                      |
| GO:0061036 | positive regulation of cartilage development             | 4.413986e-5 | 1.583763e-2 | 7.791668e-5  | 1.572578e-2 | 3        | 29         | BMP2,FGF18,RUNX2                                                                   |
| GO:0050673 | epithelial cell proliferation                            | 4.603547e-5 | 1.607130e-2 | 3.985753e-6  | 2.340181e-3 | 5        | 83         | BMPER,FERMT1,FGF10,SHH,WNT16                                                       |
| GO:0042487 | regulation of odontogenesis of dentin-containing tooth   | 4.874129e-5 | 1.656819e-2 | 7.225373e-4  | 8.186855e-2 | 2        | 14         | BMP2,RUNX2                                                                         |
| GO:0043583 | ear development                                          | 5.471523e-5 | 1.812196e-2 | 2.555976e-5  | 7.678033e-3 | 6        | 204        | BMP2,BMPER,DLX6,FGF10,INSIG2,SHH                                                   |
| GO:0035136 | forelimb morphogenesis                                   | 6.706292e-5 | 2.165629e-2 | 5.169562e-6  | 2.671009e-3 | 4        | 40         | EN1,RUNX2,SHH,SHOX2                                                                |
| GO:0072111 | cell proliferation involved in kidney development        | 7.562083e-5 | 2.382425e-2 | 3.599450e-4  | 5.406290e-2 | 2        | 10         | BMP2,SHH                                                                           |
| GO:1901862 | negative regulation of muscle tissue development         | 8.489088e-5 | 2.610799e-2 | 2.928989e-4  | 4.670833e-3 | 3        | 45         | BMP2,MEIS1,SHH                                                                     |
| GO:0009952 | anterior/posterior pattern specification                 | 8.805062e-5 | 2.645000e-2 | 2.459117e-4  | 4.179528e-2 | 5        | 196        | ALX1,BMP2,EN1,SHH,ZEB2                                                             |
| GO:0021978 | telencephalon regionalization                            | 9.423318e-5 | 2.766386e-2 | 6.204609e-4  | 7.706244e-2 | 2        | 13         | BMP2,SHH                                                                           |
| GO:0035239 | tube morphogenesis                                       | 9.666666e-5 | 2.774763e-2 | 3.844390e-5  | 1.013428e-2 | 7        | 325        | ALX1,BMP2,FGF10,SHH,SHOX2,TCF21,ZEB2                                               |
| GO:0048566 | embryonic digestive tract development                    | 9.810631e-5 | 2.754868e-2 | 2.993501e-6  | 1.933533e-3 | 4        | 35         | FGF10,SHH,SHOX2,TCF21                                                              |
| GO:0001525 | angiogenesis                                             | 1.075675e-4 | 2.956275e-2 | 1.939250e-5  | 6.591919e-3 | 7        | 292        | BMPER,FGF10,FGF18,MEIS1,RSPO3,SHH,TCF21                                            |
| GO:0002076 | osteoblast development                                   | 1.078027e-4 | 2.901016e-2 | 1.485867e-5  | 5.187282e-3 | 3        | 17         | PTHLH,RUNX2,SHH                                                                    |
| GO:0060021 | palate development                                       | 1.086550e-4 | 2.864279e-2 | 6.620061e-6  | 3.053976e-3 | 5        | 92         | ALX1,DLX6,INSIG2,SHH,TCF21                                                         |
| GO:0021536 | diacephalon development                                  | 1.102575e-4 | 2.848392e-2 | 7.075414e-5  | 1.523219e-2 | 4        | 77         | BMP2,FGF10,SHH,ZEB2                                                                |

**Supplementary Table 4, FUMA functional enrichment of genome-wide loci for phenotypes in GWAS Catalog.**  
 Enrichment was performed with default settings on the set of genes annotated with GREAT for consistency with the other gene set enrichment analyses.  
 P-values were obtained from a hypergeometric test (one-tailed). Only significant (FDR < 0.05) terms are shown.

| Description                                                                                            | HyperP      | HyperFDR    | ObsGenes | TotalGenes | Genes                                                                             |
|--------------------------------------------------------------------------------------------------------|-------------|-------------|----------|------------|-----------------------------------------------------------------------------------|
| Monobrow                                                                                               | 3.51E-13    | 6.36E-10    | 8        | 77         | WARS2,INSIG2,EN1,HOXD1,MTX2,SHOX2,CDCSL,RSPO3                                     |
| Ossification of the posterior longitudinal ligament of the spine                                       | 3.25E-12    | 2.95E-09    | 5        | 11         | PTHLH,CDC91,HAO1,CDCS1,EMC2                                                       |
| Lung function (FVC)                                                                                    | 1.05E-11    | 6.38E-09    | 9        | 184        | PTHLH,CDC91,ALX1,EN1,BMP2,FGF10,CDCSL,RUNX2,RSPO3                                 |
| Heel bone mineral density                                                                              | 2.18E-11    | 8.15E-09    | 14       | 834        | CYP26A1,CDC91,FAR2,HMGA2,MEIS1,INSIG2,EN1,BMP2,HAO1,RSPO3,EYA4,CPED1,WNT16,ACTL7B |
| Chin dimples                                                                                           | 2.25E-11    | 8.15E-09    | 7        | 74         | HMGA2,LLPH,ZEB2,MTX2,TBL1XR1,KCNMB2,CDCSL                                         |
| Male-pattern baldness                                                                                  | 1.87E-10    | 5.66E-08    | 9        | 254        | WARS2,PTHLH,FAR2,HOXD1,MTX2,CDCSL,RSPO3,EMC2,TMEM74                               |
| Waist circumference adjusted for BMI in non-smokers                                                    | 1.20E-09    | 3.12E-07    | 6        | 70         | WARS2,CCDC91,HMGA2,ADAMTSL3,BMP2,RSPO3                                            |
| Waist circumference adjusted for BMI (joint analysis main effects and smoking interaction)             | 2.72E-09    | 6.18E-07    | 6        | 80         | WARS2,CCDC91,HMGA2,ADAMTSL3,BMP2,RSPO3                                            |
| Waist circumference adjusted for BMI (adjusted for smoking behaviour)                                  | 3.16E-09    | 6.38E-07    | 6        | 82         | WARS2,CCDC91,HMGA2,ADAMTSL3,BMP2,RSPO3                                            |
| Bone ultrasound measurement (velocity of sound)                                                        | 3.52E-09    | 6.39E-07    | 4        | 13         | CCDC91,EN1,RSPO3,WNT16                                                            |
| Bone mineral density (paediatric, total body less head)                                                | 6.71E-09    | 1.11E-06    | 4        | 15         | PTHLH,RSPO3,CPED1,WNT16                                                           |
| Bone mineral density (paediatric, skull)                                                               | 1.50E-08    | 2.27E-06    | 4        | 18         | RSPO3,EYA4,CPED1,WNT16                                                            |
| Waist-to-hip ratio adjusted for BMI (adjusted for smoking behaviour)                                   | 7.95E-08    | 1.11E-05    | 5        | 70         | WARS2,MEIS1,BMP2,RSPO3,EYA4                                                       |
| Bone mineral density (paediatric, upper limb)                                                          | 1.91E-07    | 2.48E-05    | 3        | 8          | RSPO3,CPED1,WNT16                                                                 |
| Bone mineral density (paediatric, lower limb)                                                          | 2.86E-07    | 3.46E-05    | 3        | 9          | PTHLH,CPED1,WNT16                                                                 |
| Height                                                                                                 | 9.77E-07    | 0.000110805 | 10       | 898        | CCDC91,HMGA2,ADAMTSL3,MEIS1,BMP2,SHOX2,FGF18,CDCSL,RUNX2,SLC25A13                 |
| Hip circumference adjusted for BMI                                                                     | 1.07E-06    | 0.000114428 | 6        | 218        | CCDC91,HMGA2,ADAMTSL3,BMP2,RSPO3,EYA4                                             |
| Waist circumference adjusted for body mass index                                                       | 1.46E-06    | 0.000142068 | 6        | 230        | WARS2,CCDC91,HMGA2,ADAMTSL3,BMP2,RSPO3                                            |
| Lumbar spine bone mineral density                                                                      | 1.49E-06    | 0.000142068 | 4        | 54         | INSIG2,EN1,CPED1,WNT16                                                            |
| Waist-to-hip ratio adjusted for BMI (joint analysis for main effect and physical activity interaction) | 1.72E-06    | 0.00015639  | 4        | 56         | WARS2,MEIS1,BMP2,RSPO3                                                            |
| Femoral neck bone mineral density                                                                      | 4.23E-06    | 0.000365944 | 4        | 70         | EN1,RSPO3,SLC25A13,WNT16                                                          |
| FEV1                                                                                                   | 7.51E-06    | 0.000592391 | 5        | 175        | CCDC91,BMP2,FGF10,FGF18,CDCSL                                                     |
| Spherical equivalent or myopia (age of diagnosis)                                                      | 7.51E-06    | 0.000592391 | 5        | 175        | CYP26A1,MYOX,PCCA,ZEB2,BMP2                                                       |
| Waist circumference adjusted for BMI in active individuals                                             | 8.36E-06    | 0.000632323 | 4        | 83         | CCDC91,ADAMTSL3,BMP2,RSPO3                                                        |
| Waist circumference adjusted for BMI (joint analysis main effects and physical activity interaction)   | 9.19E-06    | 0.000667338 | 4        | 85         | CCDC91,ADAMTSL3,BMP2,RSPO3                                                        |
| Pulse pressure                                                                                         | 9.96E-06    | 0.00069495  | 8        | 690        | HMGA2,LLPH,ADAMTSL3,BMP2,SHOX2,TBL1XR1,RSPO3,TCF21                                |
| Fractures                                                                                              | 1.09E-05    | 0.000735032 | 3        | 28         | RSPO3,CPED1,WNT16                                                                 |
| Refractive error                                                                                       | 1.22E-05    | 0.000789704 | 3        | 29         | CYP26A1,PCCA,BMP2                                                                 |
| Waist-to-hip ratio adjusted for BMI in non-smokers                                                     | 1.81E-05    | 0.00113355  | 3        | 33         | WARS2,RSPO3,EYA4                                                                  |
| Smooth-surface caries                                                                                  | 1.98E-05    | 0.0012005   | 3        | 34         | FERM1T,KIF6,BBS9                                                                  |
| Pediatric bone mineral content (radius)                                                                | 2.31E-05    | 0.001339972 | 2        | 5          | CPED1,WNT16                                                                       |
| Bone mineral density                                                                                   | 2.36E-05    | 0.001339972 | 3        | 36         | RSPO3,CPED1,WNT16                                                                 |
| Waist-to-hip ratio adjusted for body mass index                                                        | 2.93E-05    | 0.001612107 | 4        | 114        | WARS2,MEIS1,BMP2,RSPO3                                                            |
| Waist-hip ratio                                                                                        | 3.03E-05    | 0.001619237 | 4        | 115        | WARS2,TSPAN10,MAP2K6,RSPO3                                                        |
| Intraocular pressure                                                                                   | 3.36E-05    | 0.001744461 | 6        | 399        | CYP26A1,MYOX,SPRED2,MEIS1,RUNX2,BBS9                                              |
| TB-LM or TBLH-BMD (pleiotropy)                                                                         | 3.46E-05    | 0.001745841 | 2        | 6          | CPED1,WNT16                                                                       |
| Intracranial volume                                                                                    | 4.84E-05    | 0.002375774 | 2        | 7          | RSPO3,RNF146                                                                      |
| Waist-to-hip ratio adjusted for BMI in active individuals                                              | 5.30E-05    | 0.002532139 | 3        | 47         | WARS2,MEIS1,RSPO3                                                                 |
| Blood urea nitrogen levels                                                                             | 7.69E-05    | 0.003580615 | 4        | 146        | CYP26A1,MTX2,RSPO3,TCF21                                                          |
| Hip minimal joint space width                                                                          | 0.000103476 | 0.004695207 | 2        | 10         | HAO1,RUNX2                                                                        |
| Corneal astigmatism                                                                                    | 0.000110312 | 0.004883336 | 3        | 60         | ZEB2,BMPER,SHH                                                                    |
| Bone properties (heel)                                                                                 | 0.000126346 | 0.005459933 | 2        | 11         | RSPO3,WNT16                                                                       |
| Eye morphology                                                                                         | 0.000151465 | 0.006393242 | 2        | 12         | HOXD1,MTX2                                                                        |
| Facial morphology traits (63 three-dimensional facial segments)                                        | 0.000178828 | 0.007055929 | 2        | 13         | EYA4,DLX6                                                                         |
| Upper eyelid morphology                                                                                | 0.000178828 | 0.007055929 | 2        | 13         | HOXD1,MTX2                                                                        |
| Food addiction                                                                                         | 0.000178828 | 0.007055929 | 2        | 13         | RSPO3,RNF146                                                                      |
| LDL cholesterol levels in current drinkers                                                             | 0.000197686 | 0.00734059  | 3        | 73         | CYP26A1,MYOX,INSIG2                                                               |
| Subcortical brain region volumes                                                                       | 0.000240256 | 0.008908121 | 2        | 15         | RSPO3,RNF146                                                                      |
| Lung function (FEV1)                                                                                   | 0.000240495 | 0.008908121 | 3        | 78         | PTHLH,CDC91,ALX1                                                                  |
| Glaucoma (primary open-angle)                                                                          | 0.000249717 | 0.009064721 | 3        | 79         | CYP26A1,MYOX,MEIS1                                                                |
| Glomerular filtration rate (creatinine)                                                                | 0.000288887 | 0.010280973 | 3        | 83         | CYP26A1,EYA4,RNF32                                                                |
| Triglyceride levels in current drinkers                                                                | 0.000299262 | 0.01044538  | 3        | 84         | CYP26A1,MYOX,RSPO3                                                                |
| Lumbar spine bone mineral density (trabecular)                                                         | 0.000310576 | 0.010635747 | 2        | 17         | PTHLH,CDC91                                                                       |
| Breast cancer                                                                                          | 0.000333157 | 0.011197767 | 4        | 214        | PTHLH,FGF10,MRPS30,RNF146                                                         |
| Triglyceride levels x alcohol consumption (drinkers vs non-drinkers) interaction (2df)                 | 0.000378666 | 0.01202841  | 3        | 91         | CYP26A1,MYOX,RSPO3                                                                |
| Waist-to-hip ratio adjusted for BMI                                                                    | 0.000385656 | 0.01202841  | 5        | 403        | WARS2,KCNJ16,MEIS1,RSPO3,RNF146                                                   |
| Primary tooth development (time to first tooth eruption)                                               | 0.000389734 | 0.01202841  | 2        | 19         | HMGA2,KCNJ16                                                                      |
| Primary tooth development (number of teeth)                                                            | 0.000389734 | 0.01202841  | 2        | 19         | HMGA2,KCNJ16                                                                      |
| Triglyceride levels x alcohol consumption (regular vs non-regular drinkers) interaction (2df)          | 0.000391006 | 0.01202841  | 3        | 92         | CYP26A1,MYOX,RSPO3                                                                |
| LDL cholesterol levels x alcohol consumption (regular vs non-regular drinkers) interaction (2df)       | 0.00042957  | 0.012871965 | 3        | 95         | CYP26A1,MYOX,INSIG2                                                               |
| Bone ultrasound measurement (broadband ultrasound attenuation)                                         | 0.000432611 | 0.012871965 | 2        | 20         | RSPO3,WNT16                                                                       |
| LDL cholesterol levels x alcohol consumption (drinkers vs non-drinkers) interaction (2df)              | 0.000484674 | 0.014188428 | 3        | 99         | CYP26A1,MYOX,INSIG2                                                               |
| Mosquito bite size                                                                                     | 0.000513844 | 0.014803609 | 3        | 101        | INSIG2,EN1,RUNX2                                                                  |
| Nose morphology                                                                                        | 0.000524929 | 0.014886663 | 2        | 22         | HAO1,CDCSL                                                                        |
| Alzheimer disease and age of onset                                                                     | 0.000625954 | 0.017478556 | 2        | 24         | FGF10,CDCSL                                                                       |
| QT interval                                                                                            | 0.000731071 | 0.019927968 | 3        | 114        | FAR2,HAO1,RSPO3                                                                   |
| Osteoarthritis (hip)                                                                                   | 0.000735633 | 0.019927968 | 2        | 26         | PTHLH,RUNX2                                                                       |
| Peak expiratory flow                                                                                   | 0.000749841 | 0.020014145 | 3        | 115        | CCDC91,BMP2,FGF18                                                                 |
| HDL cholesterol levels in current drinkers                                                             | 0.000788296 | 0.020735612 | 3        | 117        | CYP26A1,MYOX,RSPO3                                                                |
| HDL cholesterol levels x alcohol consumption (regular vs non-regular drinkers) interaction (2df)       | 0.001045465 | 0.027107427 | 3        | 129        | CYP26A1,MYOX,RSPO3                                                                |
| Waist-to-hip ratio adjusted for BMI (joint analysis main effects and smoking interaction)              | 0.00116078  | 0.028530723 | 2        | 32         | WARS2,RSPO3                                                                       |
| Bone mineral density (spine)                                                                           | 0.001186914 | 0.029510269 | 2        | 33         | EN1,RSPO3                                                                         |
| Cerebral amyloid deposition in APOE4 non-carriers (PET imaging)                                        | 0.001186914 | 0.029510269 | 2        | 33         | MAP2K6,KCNJ16                                                                     |
| HDL cholesterol levels x alcohol consumption (drinkers vs non-drinkers) interaction (2df)              | 0.001296052 | 0.031788302 | 3        | 139        | CYP26A1,MYOX,RSPO3                                                                |
| Estimated glomerular filtration rate                                                                   | 0.001362229 | 0.032965936 | 5        | 534        | CYP26A1,FGF10,MRPS30,EYA4,SHH                                                     |
| Chronic obstructive pulmonary disease                                                                  | 0.001434322 | 0.03425387  | 3        | 144        | CCDC91,ADAMTSL3,FGF18                                                             |
| Triglyceride levels                                                                                    | 0.001463042 | 0.034485982 | 3        | 145        | CYP26A1,MYOX,RSPO3                                                                |
| Hip circumference                                                                                      | 0.00158153  | 0.036800989 | 3        | 149        | HMGA2,ADAMTSL3,EYA4                                                               |
| Chronotype                                                                                             | 0.001626308 | 0.037363903 | 5        | 556        | MEIS1,SHOX2,TBL1XR1,BBS9,DLX6                                                     |
| HDL cholesterol levels                                                                                 | 0.001737885 | 0.039019481 | 3        | 154        | CYP26A1,MYOX,RSPO3                                                                |
| Corneal structure                                                                                      | 0.001741365 | 0.039019481 | 2        | 40         | TBL1XR1,KCNMB2                                                                    |
| Polycystic ovary syndrome                                                                              | 0.001828867 | 0.040480411 | 2        | 41         | FAR2,HMGA2                                                                        |
| Dentures                                                                                               | 0.002199358 | 0.047521845 | 2        | 45         | HAO1,FGF10                                                                        |
| Number of decayed, missing and filled tooth surfaces or use of dentures                                | 0.002199358 | 0.047521845 | 2        | 45         | HAO1,FGF10                                                                        |





**Supplementary Table 7, Testing of GWAS lead SNPs in craniosynostosis cohorts.**

The cohorts (sagittal, coronal, metopic, lambdoidal synostosis) comprise patient-parent trios. P-values were obtained using the TDT test (upper-tailed chi squared).

| CHR | SNP         | BP        | A1 | A2 | Sagittal (n = 189) |    |        |         |           | Coronal (n = 276) |            |            |            |            | Metopic (n = 186) |            |            |            |            | Lambdoidal (n = 51) |            |            |            |            |            |            |            |
|-----|-------------|-----------|----|----|--------------------|----|--------|---------|-----------|-------------------|------------|------------|------------|------------|-------------------|------------|------------|------------|------------|---------------------|------------|------------|------------|------------|------------|------------|------------|
|     |             |           |    |    | T                  | U  | OR     | CHISQ   | P         | T                 | U          | OR         | CHISQ      | P          | T                 | U          | OR         | CHISQ      | P          | T                   | U          | OR         | CHISQ      | P          |            |            |            |
| 1   | rs3936018   | 119139747 | C  | T  | 22                 | 23 | 0.9565 | 0.02222 | 0.8815    | Not tested        | Not tested | Not tested | Not tested | Not tested | Not tested        | Not tested | Not tested | Not tested | Not tested | Not tested          | Not tested | Not tested | Not tested | Not tested | Not tested | Not tested | Not tested |
| 2   | rs2009778   | 65750729  | C  | T  | 29                 | 29 | 1      | 0       | 1         | 49                | 40         | 1.225      | 0.9101     | 0.3401     | 24                | 36         | 0.6667     | 2.4        | 0.1213     | 6                   | 9          | 0.6667     | 0.6        | 0.4386     |            |            |            |
| 2   | rs6739488   | 118432725 | A  | G  | 38                 | 34 | 1.118  | 0.2222  | 0.6374    | 50                | 36         | 1.389      | 2.279      | 0.1311     | 38                | 21         | 1.81       | 4.898      | 0.02688    | 4                   | 9          | 0.4444     | 1.923      | 0.1655     |            |            |            |
| 2   | rs17479393  | 144895720 | T  | A  | 22                 | 21 | 1.048  | 0.02326 | 0.8788    | 24                | 40         | 0.6        | 4          | 0.0455     | 23                | 20         | 1.15       | 0.2093     | 0.6473     | 7                   | 4          | 1.75       | 0.8182     | 0.3657     |            |            |            |
| 2   | rs970797    | 176247091 | T  | G  | 29                 | 34 | 0.8529 | 0.3968  | 0.5287    | 48                | 43         | 1.116      | 0.2747     | 0.6002     | 32                | 35         | 0.9143     | 0.1343     | 0.714      | 4                   | 6          | 0.6667     | 0.4        | 0.5271     |            |            |            |
| 3   | rs7626244   | 157756785 | C  | A  | 33                 | 32 | 1.031  | 0.01538 | 0.9013    | 37                | 52         | 0.7115     | 2.528      | 0.1118     | 29                | 24         | 1.208      | 0.4717     | 0.4922     | 11                  | 8          | 1.375      | 0.4737     | 0.4913     |            |            |            |
| 3   | rs35614773  | 177593205 | G  | T  | 28                 | 29 | 0.9655 | 0.01754 | 0.8946    | 39                | 46         | 0.8478     | 0.5765     | 0.4477     | 26                | 19         | 1.368      | 1.089      | 0.2967     | 6                   | 8          | 0.75       | 0.2857     | 0.593      |            |            |            |
| 5   | rs1351637   | 44441601  | G  | A  | 24                 | 16 | 1.5    | 1.6     | 0.2059    | 31                | 25         | 1.24       | 0.6429     | 0.4227     | 20                | 14         | 1.429      | 1.059      | 0.3035     | 8                   | 5          | 1.6        | 0.6923     | 0.4054     |            |            |            |
| 5   | rs3822730   | 171747250 | G  | C  | 32                 | 29 | 1.103  | 0.1475  | 0.7009    | 60                | 34         | 1.765      | 7.191      | 0.007325   | 33                | 31         | 1.065      | 0.0625     | 0.8026     | 9                   | 11         | 0.8182     | 0.2        | 0.6547     |            |            |            |
| 6   | rs4714260   | 39568846  | C  | T  | 34                 | 27 | 1.259  | 0.8033  | 0.3701    | 50                | 39         | 1.282      | 1.36       | 0.2436     | 25                | 31         | 0.8065     | 0.6429     | 0.4227     | 6                   | 11         | 0.5455     | 1.471      | 0.2253     |            |            |            |
| 6   | rs3799970   | 44842621  | A  | T  | 25                 | 20 | 1.25   | 0.5556  | 0.4561    | 26                | 29         | 0.8966     | 0.1636     | 0.6858     | 27                | 16         | 1.688      | 2.814      | 0.09345    | 5                   | 4          | 1.25       | 0.1111     | 0.7389     |            |            |            |
| 6   | rs9491697   | 127134977 | G  | A  | 31                 | 37 | 0.8378 | 0.5294  | 0.4669    | 45                | 42         | 1.071      | 0.1034     | 0.7477     | 30                | 26         | 1.154      | 0.2857     | 0.593      | 9                   | 6          | 1.5        | 0.6        | 0.4386     |            |            |            |
| 6   | rs296418    | 133334925 | G  | A  | 21                 | 30 | 0.7    | 1.588   | 0.2076    | 32                | 45         | 0.7111     | 2.195      | 0.1385     | 23                | 24         | 0.9583     | 0.02128    | 0.884      | 7                   | 12         | 0.5833     | 1.316      | 0.2513     |            |            |            |
| 7   | rs148673350 | 33219926  | T  | C  | 8                  | 33 | 0.2424 | 15.24   | 9.45E-05  | 43                | 36         | 1.194      | 0.6203     | 0.431      | 34                | 19         | 1.789      | 4.245      | 0.03936    | 10                  | 10         | 1          | 0          | 1          |            |            |            |
| 7   | rs1581525   | 121228465 | A  | G  | 25                 | 35 | 0.7143 | 1.667   | 0.1967    | 31                | 39         | 0.7949     | 0.9143     | 0.339      | 28                | 31         | 0.9032     | 0.1525     | 0.6961     | 6                   | 8          | 0.75       | 0.2857     | 0.593      |            |            |            |
| 7   | rs147676525 | 156385384 | G  | A  | 1                  | 4  | 0.25   | 1.8     | 0.1797    | 5                 | 3          | 1.667      | 0.5        | 0.4795     | 10                | 1          | 10         | 7.364      | 0.006656   | 0                   | 0          | NA         | NA         | NA         |            |            |            |
| 8   | rs7813717   | 108634556 | A  | G  | 27                 | 39 | 0.6923 | 2.182   | 0.1396    | 48                | 49         | 0.9796     | 0.01031    | 0.9191     | 35                | 32         | 1.094      | 0.1343     | 0.714      | 9                   | 6          | 1.5        | 0.6        | 0.4386     |            |            |            |
| 9   | rs10120728  | 108615575 | C  | T  | 25                 | 34 | 0.7353 | 1.373   | 0.2413    | 37                | 40         | 0.925      | 0.1169     | 0.7324     | 27                | 24         | 1.125      | 0.1765     | 0.6744     | 7                   | 9          | 0.7778     | 0.25       | 0.6171     |            |            |            |
| 10  | rs7920484   | 93190051  | C  | A  | 33                 | 27 | 1.222  | 0.6     | 0.4386    | 47                | 47         | 1          | 0          | 1          | 23                | 39         | 0.5897     | 4.129      | 0.04215    | 7                   | 12         | 0.5833     | 1.316      | 0.2513     |            |            |            |
| 12  | rs61920200  | 28085972  | A  | G  | 30                 | 27 | 1.111  | 0.1579  | 0.6911    | 36                | 52         | 0.6923     | 2.909      | 0.08808    | 30                | 23         | 1.304      | 0.9245     | 0.3363     | 6                   | 10         | 0.6        | 1          | 0.3173     |            |            |            |
| 12  | rs10843158  | 28354259  | T  | C  | 29                 | 24 | 1.208  | 0.4717  | 0.4922    | 39                | 46         | 0.8478     | 0.5765     | 0.4477     | 26                | 21         | 1.238      | 0.5319     | 0.4658     | 9                   | 7          | 1.286      | 0.25       | 0.6171     |            |            |            |
| 12  | rs151174669 | 65980466  | T  | C  | 21                 | 27 | 0.7778 | 0.75    | 0.3865    | 40                | 28         | 1.429      | 2.118      | 0.1456     | 10                | 26         | 0.3846     | 7.111      | 0.007661   | 5                   | 10         | 0.5        | 1.667      | 0.1967     |            |            |            |
| 12  | rs11609649  | 85182714  | A  | G  | 25                 | 21 | 1.19   | 0.3478  | 0.5553    | 26                | 24         | 1.083      | 0.08       | 0.7773     | 22                | 14         | 1.571      | 1.778      | 0.1824     | 1                   | 6          | 0.1667     | 3.571      | 0.05878    |            |            |            |
| 13  | rs1034266   | 100322513 | G  | C  | 41                 | 16 | 2.562  | 10.96   | 0.0009285 | 48                | 34         | 1.412      | 2.39       | 0.1221     | 29                | 30         | 0.9667     | 0.01695    | 0.8964     | 6                   | 10         | 0.6        | 1          | 0.3173     |            |            |            |
| 15  | rs4842918   | 83868247  | C  | T  | 23                 | 18 | 1.278  | 0.6098  | 0.4349    | 35                | 46         | 0.7609     | 1.494      | 0.2216     | 20                | 28         | 0.7143     | 1.333      | 0.2482     | 3                   | 7          | 0.4286     | 1.6        | 0.2059     |            |            |            |
| 17  | rs12940346  | 70079183  | C  | T  | 25                 | 32 | 0.7812 | 0.8596  | 0.3538    | 43                | 35         | 1.229      | 0.8205     | 0.365      | 31                | 19         | 1.632      | 2.88       | 0.08969    | 11                  | 6          | 1.833      | 1.471      | 0.2253     |            |            |            |
| 20  | rs1321454   | 6608452   | C  | T  | 22                 | 24 | 0.9167 | 0.08696 | 0.7681    | 42                | 38         | 1.105      | 0.2        | 0.6547     | 31                | 37         | 0.8378     | 0.5294     | 0.4669     | 10                  | 6          | 1.667      | 1          | 0.3173     |            |            |            |
| 20  | rs6054748   | 7123941   | A  | G  | 61                 | 11 | 5.545  | 34.72   | 3.80E-09  | 58                | 36         | 1.611      | 5.149      | 0.02326    | 26                | 26         | 1          | 0          | 1          | 16                  | 4          | 4          | 7.2        | 0.00729    |            |            |            |

Supplementary Table 8, Human annotations of abnormal neurocranium and brain morphology for GWAS candidate genes.

| Lead SNP from GWAS | Probable Candidate Gene | Relevant Neurocranium Phenotypes from GWAS                                                                                                                                                                                                               | Ref DOI                                                                                                                                                                                                                                                                                                                                                                                                            | Relevant Syndromes and Disorders with Neurocranium Phenotype                                                                                                              | Association with Neurocranium Dysmorphology                                                                                                                                                                                                                                                |
|--------------------|-------------------------|----------------------------------------------------------------------------------------------------------------------------------------------------------------------------------------------------------------------------------------------------------|--------------------------------------------------------------------------------------------------------------------------------------------------------------------------------------------------------------------------------------------------------------------------------------------------------------------------------------------------------------------------------------------------------------------|---------------------------------------------------------------------------------------------------------------------------------------------------------------------------|--------------------------------------------------------------------------------------------------------------------------------------------------------------------------------------------------------------------------------------------------------------------------------------------|
| rs3936018          | TBX15                   | White et al. (2021): forehead morphology. (PMID:33288918)                                                                                                                                                                                                | <a href="https://doi.org/10.1038/s41588-020-00741-7">https://doi.org/10.1038/s41588-020-00741-7</a>                                                                                                                                                                                                                                                                                                                | Cousin Syndrome (OMIM:260660).                                                                                                                                            | Macrocephaly; Abnormality of the skull base; Frontal bossing. <a href="https://hpo.jax.org/app/browse/gene/6913">https://hpo.jax.org/app/browse/gene/6913</a>                                                                                                                              |
| rs2009778          | MEIS1                   | White et al. (2021): lateral forehead and supraorbital ridge morphology. (PMID:33288918)                                                                                                                                                                 | <a href="https://doi.org/10.1038/s41588-020-00741-7">https://doi.org/10.1038/s41588-020-00741-7</a>                                                                                                                                                                                                                                                                                                                | Cleft Palate, Cardiac Defects, And Mental Retardation (OMIM:600987).<br>15q14 Microdeletion Syndrome (ORPHA:261190).                                                      | Narrow forehead; Biparietal narrowing; Microcephaly; Large forehead. <a href="https://hpo.jax.org/app/browse/gene/4212">https://hpo.jax.org/app/browse/gene/4212</a>                                                                                                                       |
| rs6739488          | EN1                     | White et al. (2021): forehead morphology. (PMID:33288918)                                                                                                                                                                                                | <a href="https://doi.org/10.1038/s41588-020-00741-7">https://doi.org/10.1038/s41588-020-00741-7</a>                                                                                                                                                                                                                                                                                                                | Endove Syndrome, Limb-brain Type (OMIM:619218).                                                                                                                           | Microcephaly. <a href="https://hpo.jax.org/app/browse/gene/2019">https://hpo.jax.org/app/browse/gene/2019</a>                                                                                                                                                                              |
| rs17497393         | ZEB2                    | White et al. (2021): upper face and forehead morphology. (PMID:33288918)                                                                                                                                                                                 | <a href="https://doi.org/10.1038/s41588-020-00741-7">https://doi.org/10.1038/s41588-020-00741-7</a>                                                                                                                                                                                                                                                                                                                | Mowat-Wilson Syndrome (OMIM:235730).                                                                                                                                      | Microcephaly; Abnormal posterior cranial fossa morphology; Frontal bossing; Right unicoronal synostosis. <a href="https://hpo.jax.org/app/browse/gene/9839">https://hpo.jax.org/app/browse/gene/9839</a>                                                                                   |
| rs970797           | HOXD10/13               | White et al. (2021): global face morphology, including forehead region. (PMID:33288918)                                                                                                                                                                  | <a href="https://doi.org/10.1038/s41588-020-00741-7">https://doi.org/10.1038/s41588-020-00741-7</a>                                                                                                                                                                                                                                                                                                                | Brachydactyly Type E (ORPHA:93387).                                                                                                                                       | Frontal bossing; Macrocephaly. <a href="https://hpo.jax.org/app/browse/gene/2239">https://hpo.jax.org/app/browse/gene/2239</a>                                                                                                                                                             |
| rs7626244          | SHOX2                   | White et al. (2021): forehead morphology. (PMID:33288918)                                                                                                                                                                                                | <a href="https://doi.org/10.1038/s41588-020-00741-7">https://doi.org/10.1038/s41588-020-00741-7</a>                                                                                                                                                                                                                                                                                                                | Pierpont Syndrome (ORPHA:487825).                                                                                                                                         | Microcephaly; High forehead; Brachycephaly. <a href="https://hpo.jax.org/app/browse/gene/79718">https://hpo.jax.org/app/browse/gene/79718</a>                                                                                                                                              |
| rs35614773         | TBL1XR1                 | White et al. (2021): forehead morphology. (PMID:33288918)                                                                                                                                                                                                | <a href="https://doi.org/10.1038/s41588-020-00741-7">https://doi.org/10.1038/s41588-020-00741-7</a>                                                                                                                                                                                                                                                                                                                | Lacrimoauriculodigital Syndrome (OMIM:149730).                                                                                                                            | Broad forehead. <a href="https://hpo.jax.org/app/browse/gene/2255">https://hpo.jax.org/app/browse/gene/2255</a>                                                                                                                                                                            |
| rs1351637          | FGF10                   | White et al. (2021): lateral forehead and temple region morphology. (PMID:33288918)                                                                                                                                                                      | <a href="https://doi.org/10.1038/s41588-020-00741-7">https://doi.org/10.1038/s41588-020-00741-7</a>                                                                                                                                                                                                                                                                                                                |                                                                                                                                                                           |                                                                                                                                                                                                                                                                                            |
| rs3822730          | FGF18                   | White et al. (2021): central forehead and supraorbital ridge morphology. (PMID:33288918)<br>Shadrin et al. (2021): brain morphology. (PMID:34560273)                                                                                                     | <a href="https://doi.org/10.1038/s41588-020-00741-7">https://doi.org/10.1038/s41588-020-00741-7</a><br><a href="https://doi.org/10.1016/j.neuroimage.2021.118603">https://doi.org/10.1016/j.neuroimage.2021.118603</a>                                                                                                                                                                                             |                                                                                                                                                                           |                                                                                                                                                                                                                                                                                            |
| rs4714260          | KIF6                    | White et al. (2021): forehead morphology. (PMID:33288918)<br>Shadrin et al. (2021): brain morphology. (PMID:34560273)<br>van der Meer et al. (2020): brain morphology. (PMID:32665545)                                                                   | <a href="https://doi.org/10.1038/s41588-020-00741-7">https://doi.org/10.1038/s41588-020-00741-7</a><br><a href="https://doi.org/10.1016/j.neuroimage.2021.118603">https://doi.org/10.1016/j.neuroimage.2021.118603</a><br><a href="https://doi.org/10.1038/s41467-020-17368-1">https://doi.org/10.1038/s41467-020-17368-1</a>                                                                                      | Isolated case report (Konjikusic et al., 2018 (PMID:30475797); <a href="https://doi.org/10.1371/journal.pgen.1007817">https://doi.org/10.1371/journal.pgen.1007817</a> ). | Macrocephaly.                                                                                                                                                                                                                                                                              |
| rs3799970          | RUNX2                   | van der Meer et al. (2020): brain morphology. (PMID:32665545)                                                                                                                                                                                            | <a href="https://doi.org/10.1038/s41467-020-17368-1">https://doi.org/10.1038/s41467-020-17368-1</a>                                                                                                                                                                                                                                                                                                                | Cleidocranial Dysplasia (OMIM:119600).                                                                                                                                    | Thickened calvaria; Broad forehead; Macrocephaly; Sloping forehead; Parietal bossing; Persistent open anterior fontanelle; Frontal bossing; Wormian bones; Large fontanelles; Brachycephaly. <a href="https://hpo.jax.org/app/browse/gene/860">https://hpo.jax.org/app/browse/gene/860</a> |
| rs9491697          | RSPO3                   | Grasby et al. (2020): brain morphology. (PMID:32193296)                                                                                                                                                                                                  | <a href="https://doi.org/10.1126/science.aay6690">https://doi.org/10.1126/science.aay6690</a>                                                                                                                                                                                                                                                                                                                      |                                                                                                                                                                           |                                                                                                                                                                                                                                                                                            |
| rs296418           | EYA4                    | White et al. (2021): forehead morphology. (PMID:33288918)<br>Shadrin et al. (2021): brain morphology. (PMID:34560273)                                                                                                                                    | <a href="https://doi.org/10.1038/s41588-020-00741-7">https://doi.org/10.1038/s41588-020-00741-7</a><br><a href="https://doi.org/10.1016/j.neuroimage.2021.118603">https://doi.org/10.1016/j.neuroimage.2021.118603</a>                                                                                                                                                                                             |                                                                                                                                                                           |                                                                                                                                                                                                                                                                                            |
| rs148673350        | BBS9                    | Justice et al. (2012): sagittal synostosis; metopic synostosis. (PMID:23160099)<br>van der Meer et al. (2020): brain morphology. (PMID:32665545)                                                                                                         | <a href="https://doi.org/10.1038/ng.2463">https://doi.org/10.1038/ng.2463</a><br><a href="https://doi.org/10.1038/s41467-020-17368-1">https://doi.org/10.1038/s41467-020-17368-1</a>                                                                                                                                                                                                                               | Bardet-Biedl Syndrome (ORPHA:110).                                                                                                                                        |                                                                                                                                                                                                                                                                                            |
| rs20205590         | DLX5                    |                                                                                                                                                                                                                                                          |                                                                                                                                                                                                                                                                                                                                                                                                                    | Split-hand/foot Malformation 1 With Sensorineural Hearing Loss (OMIM:220600).                                                                                             | Frontal bossing. <a href="https://www.omim.org/entry/220600">https://www.omim.org/entry/220600</a>                                                                                                                                                                                         |
| rs1581525          | WNT16                   | White et al. (2021): forehead morphology. (PMID:33288918)<br>Zhao et al. (2019): brain morphology. (PMID:31676860)                                                                                                                                       | <a href="https://doi.org/10.1038/s41588-020-00741-7">https://doi.org/10.1038/s41588-020-00741-7</a><br><a href="https://doi.org/10.1038/s41588-019-0516-6">https://doi.org/10.1038/s41588-019-0516-6</a>                                                                                                                                                                                                           |                                                                                                                                                                           |                                                                                                                                                                                                                                                                                            |
| rs147676525        | SHH                     | Shadrin et al. (2021): brain morphology. (PMID:34560273)                                                                                                                                                                                                 | <a href="https://doi.org/10.1016/j.neuroimage.2021.118603">https://doi.org/10.1016/j.neuroimage.2021.118603</a>                                                                                                                                                                                                                                                                                                    | Holoprosencephaly (ORPHA:220386; ORPHA:93925; ORPHA:93924; ORPHA:280200).                                                                                                 | Megalencephaly; Macrocephaly; Microcephaly. <a href="https://hpo.jax.org/app/browse/gene/6469">https://hpo.jax.org/app/browse/gene/6469</a>                                                                                                                                                |
| rs7813717          | RSPO2                   | van der Meer et al. (2020): brain morphology. (PMID:32665545)                                                                                                                                                                                            | <a href="https://doi.org/10.1038/s41467-020-17368-1">https://doi.org/10.1038/s41467-020-17368-1</a>                                                                                                                                                                                                                                                                                                                | Humerofemoral Hypoplasia with Radiotibial Ray Deficiency (OMIM:618022).                                                                                                   | Prominent glabella. <a href="https://hpo.jax.org/app/browse/gene/340419">https://hpo.jax.org/app/browse/gene/340419</a>                                                                                                                                                                    |
| rs10120728         | ELP1                    |                                                                                                                                                                                                                                                          |                                                                                                                                                                                                                                                                                                                                                                                                                    |                                                                                                                                                                           |                                                                                                                                                                                                                                                                                            |
| rs7920484          | CEP55                   |                                                                                                                                                                                                                                                          |                                                                                                                                                                                                                                                                                                                                                                                                                    |                                                                                                                                                                           |                                                                                                                                                                                                                                                                                            |
| rs61920200         | PTH1H                   | White et al. (2021): forehead morphology. (PMID:33288918)<br>Shadrin et al. (2021): brain morphology. (PMID:34560273)                                                                                                                                    | <a href="https://doi.org/10.1038/s41588-020-00741-7">https://doi.org/10.1038/s41588-020-00741-7</a><br><a href="https://doi.org/10.1016/j.neuroimage.2021.118603">https://doi.org/10.1016/j.neuroimage.2021.118603</a>                                                                                                                                                                                             | Brachydactyly Type E (ORPHA:93387).                                                                                                                                       | Frontal bossing; Macrocephaly. <a href="https://hpo.jax.org/app/browse/gene/5744">https://hpo.jax.org/app/browse/gene/5744</a>                                                                                                                                                             |
| rs10843158         |                         | White et al. (2021): forehead morphology. (PMID:33288918)<br>Taal et al. (2012): head circumference. (PMID:22504419)                                                                                                                                     | <a href="https://doi.org/10.1038/s41588-020-00741-7">https://doi.org/10.1038/s41588-020-00741-7</a><br><a href="https://doi.org/10.1038/ng.2238">https://doi.org/10.1038/ng.2238</a>                                                                                                                                                                                                                               | Silver-Russell Syndrome 5 (OMIM:618908).<br>12q14 Microdeletion Syndrome (ORPHA:94063).                                                                                   | Microcephaly; Prominent forehead; Frontal bossing. <a href="https://hpo.jax.org/app/browse/gene/8091">https://hpo.jax.org/app/browse/gene/8091</a>                                                                                                                                         |
| rs151174669        | HMGGA2                  | Bonforte et al. (2021): supraorbital ridge morphology. (PMID:33547071)<br>Yang et al. (2019): head circumference. (PMID:31681408)<br>Shadrin et al. (2021): brain morphology. (PMID:34560273)<br>Grasby et al. (2020): brain morphology. (PMID:32193296) | <a href="https://doi.org/10.1126/sciadv.abc6160">https://doi.org/10.1126/sciadv.abc6160</a><br><a href="https://doi.org/10.3389/fgene.2019.00947">https://doi.org/10.3389/fgene.2019.00947</a><br><a href="https://doi.org/10.1016/j.neuroimage.2021.118603">https://doi.org/10.1016/j.neuroimage.2021.118603</a><br><a href="https://doi.org/10.1126/science.aay6690">https://doi.org/10.1126/science.aay6690</a> |                                                                                                                                                                           |                                                                                                                                                                                                                                                                                            |
| rs11609649         | ALX1                    | White et al. (2021): global face morphology, including forehead region. (PMID:33288918)<br>Shadrin et al. (2021): brain morphology. (PMID:34560273)                                                                                                      | <a href="https://doi.org/10.1038/s41588-020-00741-7">https://doi.org/10.1038/s41588-020-00741-7</a><br><a href="https://doi.org/10.1016/j.neuroimage.2021.118603">https://doi.org/10.1016/j.neuroimage.2021.118603</a>                                                                                                                                                                                             | Frontonasal Dysplasia 3 (OMIM:613456).                                                                                                                                    | Hypoplasia of the frontal bone; Brachycephaly; Prominent glabella. <a href="https://hpo.jax.org/app/browse/gene/8092">https://hpo.jax.org/app/browse/gene/8092</a>                                                                                                                         |
| rs1034266          | ZIC2                    | White et al. (2021): forehead morphology. (PMID:33288918)                                                                                                                                                                                                | <a href="https://doi.org/10.1038/s41588-020-00741-7">https://doi.org/10.1038/s41588-020-00741-7</a>                                                                                                                                                                                                                                                                                                                | Holoprosencephaly (ORPHA:220386; ORPHA:93925; ORPHA:93924; ORPHA:280200).                                                                                                 | Megalencephaly; Macrocephaly; Microcephaly; Broad forehead; Sloping forehead; High forehead; Narrow forehead. <a href="https://hpo.jax.org/app/browse/gene/7546">https://hpo.jax.org/app/browse/gene/7546</a>                                                                              |
| rs1380208          | Gene Desert             |                                                                                                                                                                                                                                                          |                                                                                                                                                                                                                                                                                                                                                                                                                    |                                                                                                                                                                           |                                                                                                                                                                                                                                                                                            |
| rs4842918          | ADAMTS13                | Shadrin et al. (2021): brain morphology. (PMID:34560273)                                                                                                                                                                                                 | <a href="https://doi.org/10.1016/j.neuroimage.2021.118603">https://doi.org/10.1016/j.neuroimage.2021.118603</a>                                                                                                                                                                                                                                                                                                    |                                                                                                                                                                           |                                                                                                                                                                                                                                                                                            |
| rs12940346         | KCNJ2                   |                                                                                                                                                                                                                                                          |                                                                                                                                                                                                                                                                                                                                                                                                                    | Andersen Cardiodysrhythmic Periodic Paralysis (OMIM:170300).<br>Andersen-Tawil Syndrome (ORPHA:37553).                                                                    | Prominent frontal sinuses; Broad forehead; Microcephaly; Scaphocephaly. <a href="https://hpo.jax.org/app/browse/gene/3759">https://hpo.jax.org/app/browse/gene/3759</a>                                                                                                                    |
| rs1321454          | BMP2                    | Justice et al. (2012): sagittal synostosis. (PMID:23160099)                                                                                                                                                                                              | <a href="https://doi.org/10.1038/ng.2463">https://doi.org/10.1038/ng.2463</a>                                                                                                                                                                                                                                                                                                                                      | 20p12.3 Microdeletion Syndrome (ORPHA:261295).                                                                                                                            | Broad forehead; Narrow forehead; Macrocephaly.                                                                                                                                                                                                                                             |
| rs6054748          |                         | Shadrin et al. (2021): brain morphology. (PMID:34560273)                                                                                                                                                                                                 | <a href="https://doi.org/10.1016/j.neuroimage.2021.118603">https://doi.org/10.1016/j.neuroimage.2021.118603</a>                                                                                                                                                                                                                                                                                                    | Short Stature, Facial Dysmorphism, and Skeletal Anomalies with or without Cardiac Anomalies (OMIM:617877).                                                                | <a href="https://hpo.jax.org/app/browse/gene/650">https://hpo.jax.org/app/browse/gene/650</a>                                                                                                                                                                                              |



Supplementary Table 9, Mouse annotations of abnormal neurocranium morphology for GWAS candidate genes.

| Lead SNP from GWAS | Probable Candidate Gene | Neurocranium and Brain Phenotypes in Mouse Mutants                                                                                                                                                                                                                                                                                                                                                                                                                                                                                                                                                                                                                                                                                                                                                                                                                                                                          | Neurocranium and Brain Expression in Mouse                                                                                                                                                                                                                                                                                                                                                    | Notes                                                                                                                                                                           | MGU URL              |                      |
|--------------------|-------------------------|-----------------------------------------------------------------------------------------------------------------------------------------------------------------------------------------------------------------------------------------------------------------------------------------------------------------------------------------------------------------------------------------------------------------------------------------------------------------------------------------------------------------------------------------------------------------------------------------------------------------------------------------------------------------------------------------------------------------------------------------------------------------------------------------------------------------------------------------------------------------------------------------------------------------------------|-----------------------------------------------------------------------------------------------------------------------------------------------------------------------------------------------------------------------------------------------------------------------------------------------------------------------------------------------------------------------------------------------|---------------------------------------------------------------------------------------------------------------------------------------------------------------------------------|----------------------|----------------------|
| r13936018          | TRX15                   | Kuljper et al. (2005): abnormal basioccipital bone morphology; decreased cranium height; decreased cranium width. (PMID:1573667)                                                                                                                                                                                                                                                                                                                                                                                                                                                                                                                                                                                                                                                                                                                                                                                            | From MGU: Brain (forebrain, hindbrain, midbrain); Cranial Base (basioccipital cartilage condensation).                                                                                                                                                                                                                                                                                        | Another potentially relevant gene at this locus is <i>WARS2</i> .<br>TRX15 also associated shows neurocranium expression in Zebrafish. (Begemann et al., 2002). (PMID:12175500) | <a href="#">Link</a> |                      |
| r12009778          | MES1                    | Curry (1959): shortened head. (PMID:13654621)<br>Singh et al. (2005): abnormal neurocranium morphology; abnormal occipital bone morphology; abnormal temporal bone morphology; small basioccipital bone. (PMID: 15637701)<br>Hisa et al. (2004): abnormal brain morphology. (PMID:14713950)                                                                                                                                                                                                                                                                                                                                                                                                                                                                                                                                                                                                                                 | From MGU: Brain (forebrain, hindbrain, midbrain, cerebral cortex gray matter).                                                                                                                                                                                                                                                                                                                | MES1 also associated with craniofacial morphology in Zebrafish (Melvin et al., 2013). (PMID:23595552)<br>Another potentially relevant gene at this locus is <i>SPRED2</i> .     | <a href="#">Link</a> |                      |
| r16739488          | EN1                     | Brocchi et al. (1999): abnormal brain morphology; abnormal cerebellum morphology. (PMID:10490023)<br>Fanhuyssen et al. (2004): abnormal cerebellum morphology; abnormal hindbrain morphology. (PMID:15112182)<br>Loomis et al. (1996): abnormal brain morphology; abnormal cerebellum morphology. (PMID:8684466)<br>Cayan et al. (1997): abnormal brain morphology. (PMID:9362463)<br>Sgaler et al. (2007): abnormal cerebellum morphology. (PMID:17537797)<br>Hanks et al. (1998): abnormal brain morphology; abnormal cerebellum morphology. (PMID:9778510)<br>Deckelbaum et al. (2006): wide cranial sutures; hypoplastic and undermineralized cranial vault bones. (PMID:16319148)                                                                                                                                                                                                                                      | From MGU: Brain (forebrain, hindbrain, midbrain).<br>Augustine et al. (1995): Brain (developing neural tube). (PMID:7482351)<br>Tran et al. (2010): Cranial vault (frontal bone, parietal bone). (PMID:20980604)<br>Deckelbaum et al. (2006): Cranial Vault (frontal bone, parietal bone, interparietal bone, all cranial sutures). (PMID:16319148)                                           |                                                                                                                                                                                 |                      | <a href="#">Link</a> |
| r117479393         | ZEB2                    | Van de Putte et al. (2003): abnormal cranial neural crest cell migration; abnormal neural crest cell delamination; open neural tube. (PMID:12527671)<br>Miyoshi et al. (2006): open neural tube; abnormal neural plate morphology. (PMID:16598713)                                                                                                                                                                                                                                                                                                                                                                                                                                                                                                                                                                                                                                                                          | From MGU: Brain (forebrain, hindbrain, midbrain, cerebral cortex gray matter).                                                                                                                                                                                                                                                                                                                |                                                                                                                                                                                 | <a href="#">Link</a> |                      |
| r1870797           | HOMD10                  |                                                                                                                                                                                                                                                                                                                                                                                                                                                                                                                                                                                                                                                                                                                                                                                                                                                                                                                             | Bassez et al. (2004): Brain (developing neural tube). (PMID:15006694)                                                                                                                                                                                                                                                                                                                         |                                                                                                                                                                                 | <a href="#">Link</a> |                      |
| r17626244          | SHOX2                   |                                                                                                                                                                                                                                                                                                                                                                                                                                                                                                                                                                                                                                                                                                                                                                                                                                                                                                                             | From MGU: Brain (forebrain, hindbrain, midbrain, cerebral cortex gray matter).                                                                                                                                                                                                                                                                                                                | Other potentially relevant genes at this locus include <i>EVX2</i> , <i>HOMD11</i> , <i>HOMD12</i> , <i>HOMD13</i> , and <i>MPX2</i> .                                          | <a href="#">Link</a> |                      |
| r153644773         | IBL1AR1                 |                                                                                                                                                                                                                                                                                                                                                                                                                                                                                                                                                                                                                                                                                                                                                                                                                                                                                                                             | From MGU: Brain (forebrain, hindbrain, midbrain, cerebral cortex gray matter).                                                                                                                                                                                                                                                                                                                | Other potentially relevant genes at this locus include <i>VEPPI1</i> , <i>PTK3</i> and <i>RSRC1</i> .                                                                           | <a href="#">Link</a> |                      |
| r13351637          | FGF10                   |                                                                                                                                                                                                                                                                                                                                                                                                                                                                                                                                                                                                                                                                                                                                                                                                                                                                                                                             | From MGU: Brain (forebrain, hindbrain, midbrain, cerebral cortex gray matter); cerebellum gray matter); Cranial vault (coronal suture).<br>Vestinen et al. (2009): Cranial vault (developing frontal bone). (PMID:19205045)                                                                                                                                                                   |                                                                                                                                                                                 | <a href="#">Link</a> |                      |
| r13822730          | FGF18                   | Liu et al. (2007): abnormal cranial suture morphology; abnormal craniofacial bone morphology; small neurocranium. (PMID:13937493)<br>Ohbayashi et al. (2002): delayed cranial suture closure. (PMID:11937494)<br>Hung et al. (2016): altered size and shape of the neurocranium. (PMID:26794256)                                                                                                                                                                                                                                                                                                                                                                                                                                                                                                                                                                                                                            | From MGU: Brain (forebrain, hindbrain, midbrain, cerebral cortex gray matter); Cranial base; Cranial Vault (frontal bone, parietal bone, coronal suture, sagittal suture, metopic suture).                                                                                                                                                                                                    |                                                                                                                                                                                 | <a href="#">Link</a> |                      |
| r14714260          | KIF6                    | Konjusic et al. (2018): domed cranium; increased brain size. (PMID:30475797)                                                                                                                                                                                                                                                                                                                                                                                                                                                                                                                                                                                                                                                                                                                                                                                                                                                | From MGU: Brain (forebrain, hindbrain, midbrain, cerebral cortex gray matter).                                                                                                                                                                                                                                                                                                                | Another potentially relevant gene at this locus is <i>DAAM2</i> .                                                                                                               | <a href="#">Link</a> |                      |
| r13799970          | RUNX2                   | Lou et al. (2009): abnormal neurocranium morphology; abnormal cranial suture morphology; small basioccipital bone; wide cranial sutures. (PMID:19028669)<br>Obara et al. (2014): abnormal neurocranium morphology; absent occipital bone; delayed sagittal suture closure. (PMID:25244033)<br>Komori et al. (1997): abnormal neurocranium morphology; abnormal interparietal bone morphology; abnormal carotid bone morphology; abnormal supraoccipital bone morphology. (PMID:9182763)<br>Kugiyama et al. (2007): abnormal neurocranium morphology; delayed fontanelle closure. (PMID:17786208)<br>Xiao et al. (2004): abnormal cranium morphology; absent occipital bone. (PMID:15007057)<br>Otto et al. (1997): abnormal cranium morphology; abnormal fontanelle morphology; interparietal bone hypoplasia; wide cranial sutures. (PMID:9182764)<br>Hesse et al. (2000): abnormal fontanelle morphology. (PMID:21173110) | From MGU: Brain (forebrain, hindbrain, midbrain, cerebral cortex gray matter); Chondrocranium (basioccipital bone, basioccipital bone, occipital bone); Cranial vault (frontal bone, parietal bone, interparietal bone, cranial sutures, fontanelle).                                                                                                                                         |                                                                                                                                                                                 | <a href="#">Link</a> |                      |
| r18491697          | RSPO3                   |                                                                                                                                                                                                                                                                                                                                                                                                                                                                                                                                                                                                                                                                                                                                                                                                                                                                                                                             | From MGU: Brain (forebrain, hindbrain, midbrain, cerebral cortex gray matter).                                                                                                                                                                                                                                                                                                                | RSPO3 also involved in craniofacial development in zebrafish (Alhazmi et al., 2021). (PMID:33712657)                                                                            | <a href="#">Link</a> |                      |
| r1294618           | EYAA4                   |                                                                                                                                                                                                                                                                                                                                                                                                                                                                                                                                                                                                                                                                                                                                                                                                                                                                                                                             | From MGU: Brain (forebrain, hindbrain, midbrain, cerebral cortex gray matter); Chondrocranium<br>Borani et al. (1999): Chondrocranium (basioccipital). (PMID:9887327)                                                                                                                                                                                                                         |                                                                                                                                                                                 | <a href="#">Link</a> |                      |
| r1148673350        | BBS9                    |                                                                                                                                                                                                                                                                                                                                                                                                                                                                                                                                                                                                                                                                                                                                                                                                                                                                                                                             | From MGU: Brain (forebrain, hindbrain, midbrain, cerebral cortex gray matter).                                                                                                                                                                                                                                                                                                                | BBS9 also involved in brain development in zebrafish (Veleri et al., 2012). (PMID:22479622)                                                                                     | <a href="#">Link</a> |                      |
| r120205590         | DLX6                    | Beverdam et al. (2002): abnormal alisphenoid bone morphology; abnormal basicranium morphology; abnormal basioccipital bone morphology; abnormal frontal bone morphology; abnormal interparietal bone morphology; abnormal temporal squamous morphology; exencephaly. (PMID:12440231)<br>Depew et al. (1999): abnormal alisphenoid bone morphology; abnormal cranium morphology; abnormal neurocranium morphology; abnormal occipital bone morphology; abnormal temporal squamous morphology; exencephaly; small interparietal bone. (PMID:10433912)<br>Acampora et al. (1999): abnormal alisphenoid bone morphology; abnormal basioccipital bone morphology; abnormal cranium morphology; delayed cranial suture closure; ectopic cranial bone; exencephaly; wide cranial sutures; Wormian bones. (PMID:10433909)                                                                                                           | From MGU: Brain (forebrain, hindbrain, midbrain, cerebral cortex gray matter); Chondrocranium; Cranial vault (frontal bone).                                                                                                                                                                                                                                                                  | Another relevant gene at this locus is <i>DLX6</i> .                                                                                                                            | <a href="#">Link</a> |                      |
| r11581525          | WNT16                   |                                                                                                                                                                                                                                                                                                                                                                                                                                                                                                                                                                                                                                                                                                                                                                                                                                                                                                                             | From MGU: Brain (forebrain, hindbrain, midbrain, cerebral cortex gray matter).<br>Jiang et al. (2014): Cranial vault (bones prior to mineralization). (PMID:24037946)                                                                                                                                                                                                                         | Other potentially relevant genes at this locus include <i>CPED1</i> and <i>FAM58C</i> .                                                                                         | <a href="#">Link</a> |                      |
| r114767625         | SHH                     | Niedermaier et al. (2005): abnormal cranium morphology; abnormal frontal bone morphology; abnormal neurocranium morphology; thin interparietal bone. (PMID:15841179)<br>Sibley et al. (1998): microcephaly. (PMID:8276769)<br>Chan et al. (2009): cerebellum hypoplasia. (PMID:19287388)<br>Dassule et al. (2000): abnormal cranium morphology. (PMID:11044393)<br>Dalubo et al. (2003): microcephaly. (PMID:12756179)<br>Corrales et al. (2004): abnormal cerebellum morphology. (PMID:15496441)<br>Chiang et al. (1996): abnormal forebrain morphology; decreased brain size. (PMID:8837770)<br>Wu et al. (2005): decreased brain size; microcephaly. (PMID:2015047)<br>Lewis et al. (2004): abnormal cerebellum morphology; small cerebellum. (PMID:15183722)<br>Huang et al. (2007): abnormal neurocranium morphology; abnormal telencephalon morphology; increased neuroblastoma. (PMID:17468141)                      | From MGU: Brain (forebrain, hindbrain, midbrain, cerebral cortex gray matter).<br>Kim et al. (1998): Cranial vault (metopic suture; sagittal suture). (PMID:94771322)<br>Lenton et al. (2011): Cranial vault (parietal bone). (PMID:21557451)<br>Nie et al. (2005): Chondrocranium (basioccipital, basioccipital, sphenoccipital synchondrosis, intersphenoid synchondrosis). (PMID:16145660) |                                                                                                                                                                                 | <a href="#">Link</a> |                      |
| r17813717          | RSPO2                   | Yamada et al. (2009): abnormal temporal squamous morphology. (PMID:19231133)<br>Chen et al. (2009): abnormal brain development. (PMID:9015235)                                                                                                                                                                                                                                                                                                                                                                                                                                                                                                                                                                                                                                                                                                                                                                              | From MGU: Brain (forebrain, hindbrain, midbrain, cerebral cortex gray matter).                                                                                                                                                                                                                                                                                                                | RSPO2 also involved in craniofacial development in zebrafish (Alhazmi et al., 2021). (PMID:33712657)                                                                            | <a href="#">Link</a> |                      |
| r130120728         | ELP1                    | Dietrich et al. (2011): abnormal brain development; abnormal forebrain development; abnormal telencephalon development. (PMID:22046423)                                                                                                                                                                                                                                                                                                                                                                                                                                                                                                                                                                                                                                                                                                                                                                                     | From MGU: Brain (forebrain, hindbrain, midbrain, cerebral cortex gray matter).                                                                                                                                                                                                                                                                                                                | Other potentially relevant genes at this locus include <i>ACTL7B</i> , <i>ACTL7A</i> , <i>ABTRAM</i> , <i>CTNNA12</i> , and <i>TMEM245</i> .                                    | <a href="#">Link</a> |                      |
| r17920484          | CEP55                   | Tobisch et al. (2020): abnormal cerebral cortex morphology; abnormal cranium morphology; decreased brain size; microcephaly; thin cerebral cortex. (PMID:32046433)                                                                                                                                                                                                                                                                                                                                                                                                                                                                                                                                                                                                                                                                                                                                                          | From MGU: Brain (forebrain, hindbrain, midbrain, cerebral cortex gray matter).                                                                                                                                                                                                                                                                                                                | Other potentially relevant genes at this locus include <i>HHEX</i> and <i>CYP26A1</i> .                                                                                         | <a href="#">Link</a> |                      |
| r161920200         |                         | He et al. (2001): domed cranium. (PMID:11316774)                                                                                                                                                                                                                                                                                                                                                                                                                                                                                                                                                                                                                                                                                                                                                                                                                                                                            |                                                                                                                                                                                                                                                                                                                                                                                               |                                                                                                                                                                                 |                      |                      |
| r130843158         | PTFHJ                   | Amizuka et al. (2004): domed cranium. (PMID:14751559)<br>Sudo et al. (2001): domed cranium. (PMID:11068831)<br>Kangaki et al. (1994): domed cranium. (PMID:8314082)<br>Schipani et al. (1997): domed cranium. (PMID:9391087)<br>Miao et al. (2008): decreased brain size. (PMID:19091948)<br>Ishii-Suzuki et al. (1998): abnormal cranial base synchondroses. (PMID:10409817)                                                                                                                                                                                                                                                                                                                                                                                                                                                                                                                                               | From MGU: Brain (forebrain, hindbrain, midbrain, cerebral cortex gray matter); Chondrocranium (synchondroses).                                                                                                                                                                                                                                                                                | PTFHJ also shows evidence of craniofacial expression in zebrafish (Yan et al., 2012; Hoyle et al., 2022) and chicks (Abzhonov et al., 2007). (PMID:17670790;12761277;34919126)  | <a href="#">Link</a> |                      |
| r151174669         | HMG2A                   | Benson and Chada (1994): abnormally large brain size. (PMID:7958830)<br>Zhou et al. (1995): shortened head (brachycephaly). (PMID:7651535)<br>Lee et al. (2022): altered cranial vault shape. (PMID:34878116)                                                                                                                                                                                                                                                                                                                                                                                                                                                                                                                                                                                                                                                                                                               | From MGU: Brain (forebrain, hindbrain, midbrain).                                                                                                                                                                                                                                                                                                                                             | Another potentially relevant gene at this locus is <i>GRP1</i> .<br>HMG2A also associated with craniofacial dysmorphology in rabbits (Carreiro et al., 2017). (PMID:27988804)   | <a href="#">Link</a> |                      |
| r11160649          | ALX1                    | Zhao et al. (1996): abnormal forebrain morphology; absent interparietal bone; absent neurocranium; absent prephenoid bone; decreased cranium length; microcephaly; small frontal bone; small parietal bone; small supraoccipital bone; small temporal squamous; shortened head. (PMID:8673125)                                                                                                                                                                                                                                                                                                                                                                                                                                                                                                                                                                                                                              | From MGU: Brain (forebrain).                                                                                                                                                                                                                                                                                                                                                                  |                                                                                                                                                                                 | <a href="#">Link</a> |                      |
| r11034266          | ZIC2                    | Dykes et al. (2018): exencephaly. (PMID:29992973)<br>Warr et al. (2008): abnormal forebrain development; exencephaly. (PMID:18617531)<br>Elms et al. (2003): decreased neural crest cell number. (PMID:14651926)<br>Hatakeyama et al. (2013): abnormal cerebral hemisphere morphology; decreased brain size; thin cerebral cortex. (PMID:22355353)<br>Nagai et al. (2000): abnormal cerebral cortex morphology; abnormal forebrain development; abnormal telencephalon development; exencephaly; microcephaly. (PMID:10273508)                                                                                                                                                                                                                                                                                                                                                                                              | From MGU: Brain (forebrain, hindbrain, midbrain, cerebral cortex gray matter).<br>Bellchamber et al. (2021): Brain (borders of the neural plate during crest cell formation). (PMID:34638777)                                                                                                                                                                                                 | Another potentially relevant gene at this locus is <i>ZIC3</i> .<br>ZIC2 also involved in craniofacial development in zebrafish (Tesia et al., 2013). (PMID:23665175)           | <a href="#">Link</a> |                      |
| r11380208          |                         |                                                                                                                                                                                                                                                                                                                                                                                                                                                                                                                                                                                                                                                                                                                                                                                                                                                                                                                             |                                                                                                                                                                                                                                                                                                                                                                                               | This region is a gene desert                                                                                                                                                    |                      |                      |
| r14842918          | ADAMTS3                 |                                                                                                                                                                                                                                                                                                                                                                                                                                                                                                                                                                                                                                                                                                                                                                                                                                                                                                                             | From MGU: Brain (forebrain, hindbrain, midbrain, cerebral cortex gray matter).                                                                                                                                                                                                                                                                                                                | Other potentially relevant genes at this locus include <i>SH3GL3</i> and <i>GOLGA64</i> .                                                                                       | <a href="#">Link</a> |                      |
| r112940346         | KCNJ2                   | Belus et al. (2018): wide sagittal sutures; enlarged fontanelles; small squamosal bone; small basioccipital bone. (PMID:29571612)                                                                                                                                                                                                                                                                                                                                                                                                                                                                                                                                                                                                                                                                                                                                                                                           | From MGU: Brain (forebrain, hindbrain, midbrain, cerebral cortex gray matter).                                                                                                                                                                                                                                                                                                                | None of the genes at this locus are strong candidates.                                                                                                                          | <a href="#">Link</a> |                      |
| r11321454          | BMP2                    |                                                                                                                                                                                                                                                                                                                                                                                                                                                                                                                                                                                                                                                                                                                                                                                                                                                                                                                             | From MGU: Brain (neural folds). (PMID:2664374)                                                                                                                                                                                                                                                                                                                                                | There is also evidence that this region harbors regulatory elements for <i>SOR9</i> (Castori et al., 2016). (PMID:26643729)                                                     | <a href="#">Link</a> |                      |
| r16054748          |                         |                                                                                                                                                                                                                                                                                                                                                                                                                                                                                                                                                                                                                                                                                                                                                                                                                                                                                                                             | From MGU: Brain (forebrain, hindbrain, midbrain, cerebral cortex gray matter); Chondrocranium (sphenoid bone, basioccipital bone/cartilage, synchondroses).<br>Kim et al. (1998): Cranial vault (osteogenic foci of sagittal suture, parietal bone). (PMID:9477322)                                                                                                                           | Multiple locus                                                                                                                                                                  | <a href="#">Link</a> |                      |

**Supplementary Table 10, Table of reference data anchors.**

Anchor reference samples were derived from joint 1000G and HDGP datasets based on a K:6 ADMIXTURE model (Methods), followed by K-means clustering, and filtering for samples with higher-than-average main ancestry component per cluster.

| Anchor Cluster | Population | Number of Samples |
|----------------|------------|-------------------|
| 0              | Africa     | 545               |
| 1              | Europe     | 613               |
| 2              | East-Asia  | 601               |
| 3              | South-Asia | 369               |
| 4              | America    | 105               |
| 5              | Oceania    | 13                |

**Supplementary Table 11, List of GTEx8 tissues used for eQTL colocalization analysis**

**Tissue label**

|                                                                                                                                                                                                                                                                                                                                                                                                           |        |
|-----------------------------------------------------------------------------------------------------------------------------------------------------------------------------------------------------------------------------------------------------------------------------------------------------------------------------------------------------------------------------------------------------------|--------|
| Brain - Amygdala<br>Brain - Caudate (basal ganglia)<br>Brain - Nucleus accumbens (basal ganglia)<br>Brain - Putamen (basal ganglia)<br>Brain - Cerebellum<br>Brain - Cerebellar Hemisphere<br>Brain - Anterior cingulate cortex (BA24)<br>Brain - Cortex<br>Brain - Frontal Cortex (BA9)<br>Brain - Hippocampus<br>Brain - Hypothalamus<br>Brain - Spinal cord (cervical c-1)<br>Brain - Substantia nigra | Brain  |
| Cells - Cultured fibroblasts<br>Skin - Not Sun Exposed (Suprapubic)<br>Skin - Sun Exposed (Lower leg)                                                                                                                                                                                                                                                                                                     | Skin   |
| Pituitary<br>Thyroid<br>Testis                                                                                                                                                                                                                                                                                                                                                                            | Glands |
| Muscle - Skeletal<br>Adipose - Subcutaneous<br>Adipose - Visceral (Omentum)                                                                                                                                                                                                                                                                                                                               | Other  |

**Supplementary Table 12, Colocalization of GWAS loci and eQTL from 22 tissues in GTEx8.**All tissue-gene combinations with posterior probability for overlap (PP4)  $\geq 0.5$  are listed per locus.

| Lead SNP    | Tissue                                    | Gene            | PP4   |
|-------------|-------------------------------------------|-----------------|-------|
| rs3936018   | Brain - Substantia nigra                  | <i>WARS2</i>    | 0.931 |
| rs3936018   | Skin - Sun Exposed (Lower leg)            | <i>WARS2</i>    | 0.848 |
| rs3936018   | Skin - Sun Exposed (Lower leg)            | <i>HSD3B2</i>   | 0.857 |
| rs3936018   | Thyroid                                   | <i>WARS2</i>    | 0.948 |
| rs3936018   | Thyroid                                   | <i>HAO2</i>     | 0.824 |
| rs3936018   | Adipose - Visceral (Omentum)              | <i>WARS2</i>    | 0.733 |
| rs3936018   | Adipose - Visceral (Omentum)              | <i>HSD3B2</i>   | 0.837 |
| rs35614773  | Cells - Cultured fibroblasts              | <i>TBL1XR1</i>  | 0.754 |
| rs3822730   | Skin - Sun Exposed (Lower leg)            | <i>FGF18</i>    | 0.801 |
| rs4714260   | Skin - Not Sun Exposed (Suprapubic)       | <i>DAAM2</i>    | 0.978 |
| rs4714260   | Skin - Not Sun Exposed (Suprapubic)       | <i>KIF6</i>     | 0.811 |
| rs9491697   | Cells - Cultured fibroblasts              | <i>RSPO3</i>    | 0.929 |
| rs9491697   | Adipose - Subcutaneous                    | <i>RSPO3</i>    | 0.887 |
| rs296418    | Testis                                    | <i>EYA4</i>     | 0.929 |
| rs296418    | Adipose - Visceral (Omentum)              | <i>EYA4</i>     | 0.955 |
| rs148673350 | Brain - Caudate (basal ganglia)           | <i>BBS9</i>     | 0.549 |
| rs148673350 | Cells - Cultured fibroblasts              | <i>BMPER</i>    | 0.746 |
| rs148673350 | Pituitary                                 | <i>BBS9</i>     | 0.914 |
| rs1581525   | Brain - Putamen (basal ganglia)           | <i>WNT16</i>    | 0.705 |
| rs7813717   | Brain - Nucleus accumbens (basal ganglia) | <i>EMC2</i>     | 0.599 |
| rs7813717   | Brain - Putamen (basal ganglia)           | <i>EIF3E</i>    | 0.516 |
| rs7813717   | Brain - Hippocampus                       | <i>EMC2</i>     | 0.923 |
| rs7813717   | Pituitary                                 | <i>EIF3E</i>    | 0.507 |
| rs7813717   | Thyroid                                   | <i>EIF3E</i>    | 0.636 |
| rs7813717   | Testis                                    | <i>NUDCD1</i>   | 0.786 |
| rs7920484   | Brain - Cerebellar Hemisphere             | <i>CPEB3</i>    | 0.536 |
| rs7920484   | Skin - Sun Exposed (Lower leg)            | <i>KIF11</i>    | 0.611 |
| rs61920200  | Skin - Not Sun Exposed (Suprapubic)       | <i>CCDC91</i>   | 0.699 |
| rs10843158  | Skin - Not Sun Exposed (Suprapubic)       | <i>CCDC91</i>   | 0.699 |
| rs1034266   | Skin - Not Sun Exposed (Suprapubic)       | <i>ZIC2</i>     | 0.943 |
| rs1034266   | Skin - Sun Exposed (Lower leg)            | <i>ZIC2</i>     | 0.567 |
| rs1034266   | Skin - Sun Exposed (Lower leg)            | <i>PCCA</i>     | 0.620 |
| rs4842918   | Brain - Hypothalamus                      | <i>GOLGA6L4</i> | 0.820 |
| rs4842918   | Adipose - Visceral (Omentum)              | <i>WHAMM</i>    | 0.801 |
| rs12940346  | Brain - Cerebellum                        | <i>KCNJ16</i>   | 0.994 |
| rs12940346  | Brain - Cerebellar Hemisphere             | <i>KCNJ16</i>   | 0.991 |
| rs12940346  | Brain - Hippocampus                       | <i>ABCA9</i>    | 0.548 |
| rs1321454   | Cells - Cultured fibroblasts              | <i>BMP2</i>     | 0.692 |
| rs1321454   | Adipose - Visceral (Omentum)              | <i>CASC20</i>   | 0.510 |

## **Supplementary Note: Further details on methods**

### **Estimating the study-wide significance threshold**

To combine our GWAS results across multiple segments, we took for each SNP the minimal P-value across the 15 segments (minP). Since correlation between the segments is expected (due to e.g., the hierarchical nature of segments), a Bonferroni correction based on 15 independent tests would be overly stringent. For a more accurate adjustment, we estimated the number of effective independent tests per SNP following Kanai<sup>1</sup> and ran 10,000 genotype-phenotype associations under the null by permutation testing in a way that preserved the correlational structure of our phenotypes. This was repeated for 500 random SNPs and yielding an estimate of 11.44 ( $\pm 0.55$ ) independent traits.

To illustrate the robustness of this estimate, we additionally estimated the number of effective traits using several other approaches. First, we repeated the permutation testing for our 30 lead SNPs, yielding an estimate for the number of effective traits of 11.28 ( $\pm 0.50$ ). Second, we applied several methods to estimate the number of effective traits from a trait-correlation matrix. We used three methods: 1) Li & Ji<sup>2</sup>, 2) Galwey<sup>3</sup>, and 3) Li<sup>4</sup> on three different correlation matrices: 1) based on the P-values from the GWAS, 2) based on the Chi-squared statistics from the GWAS, and 3) based on the Spearman genetic correlation matrix (methods). All three correlation matrices yielded highly concordant results across methods (Table 1). While these estimates align, the most conservative estimate of 11.44 was obtained based on 10,000 permutations of 500 random SNPs. We therefore adjusted the genome-wide significance threshold (instead of the P-values themselves) using Bonferroni correction based on 11.44 effective traits, resulting in a study-wide threshold of  $4.37e-9$  (i.e.,  $5e-8 / 11.44$ ).

**Table 1** The number of effective traits estimated through different methods.

---

| Method  | P-values | Chi-squares | Genetic correlation |
|---------|----------|-------------|---------------------|
| Li & Ji | 11.00    | 10.00       | 10.00               |
| Galwey  | 11.27    | 10.84       | 10.98               |
| Li      | 8.87     | 8.52        | 8.57                |

---

In short, we tried several approaches to estimate the number of effective traits, thereby taking into account the correlational structure between the phenotypes. We showed robustness of our estimates and used the most conservative estimate to adjust the significance threshold.

## References

1. Kanai, M., Tanaka, T. & Okada, Y. Empirical estimation of genome-wide significance thresholds based on the 1000 Genomes Project data set. *J. Hum. Genet.* **61**, 861–866 (2016).
2. Li, J. & Ji, L. Adjusting multiple testing in multilocus analyses using the eigenvalues of a correlation matrix. *Heredity* **95**, 221–227 (2005).
3. Galwey, N. W. A new measure of the effective number of tests, a practical tool for comparing families of non-independent significance tests. *Genet. Epidemiol.* **33**, 559–568 (2009).
4. Li, M.-X., Gui, H.-S., Kwan, J. S. H. & Sham, P. C. GATES: A Rapid and Powerful Gene-Based Association Test Using Extended Simes Procedure. *Am. J. Hum. Genet.* **88**, 283–293 (2011).
